# Supplementary material
Source: publisher figshare collection journal article supplement (https://gsapubs.figshare.com/articles/dataset/_/20443206)

## Supplementary File S3. Concordia Plots and Weighted Mean Age Interpretations of New Zircon U-Pb Geochronology Data

This supplementary file includes detailed concordia and weighted mean age plots used in the interpretation of rock ages for 28 new zircon U-Pb geochronology samples. All plots made with Isoplot 3.75 (Ludwig, 2012). This file should be cited as the paper it accompanies:

*Attia, S., Paterson, S.R., Jiang, D., Miller, R.B., in review, Spatiotemporally heterogeneous deformation, indirect tectonomagmatic links, and lithospheric evolution during orogenic activity coeval with an arc flare-up: Geosphere, v. XX, n. X, p. XX-XX, doi: XXXXXX.*

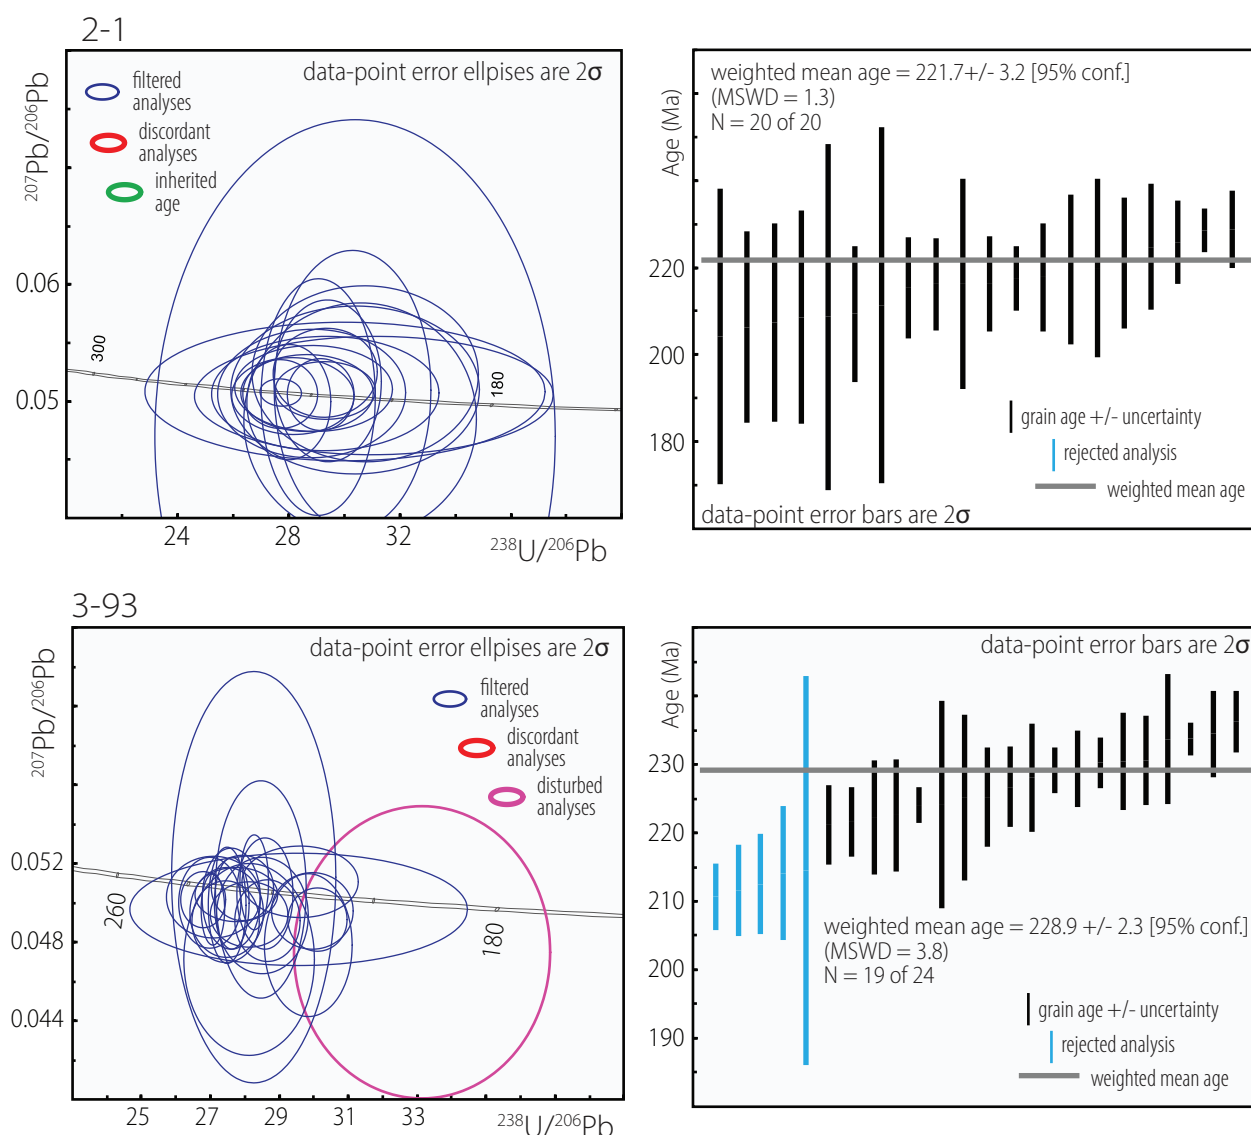

A-145

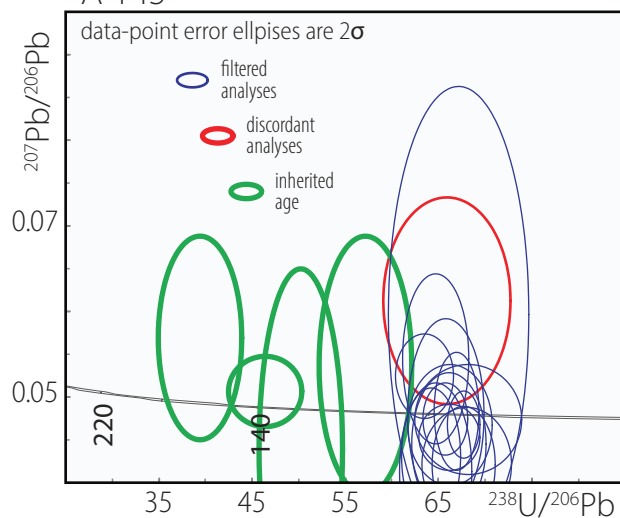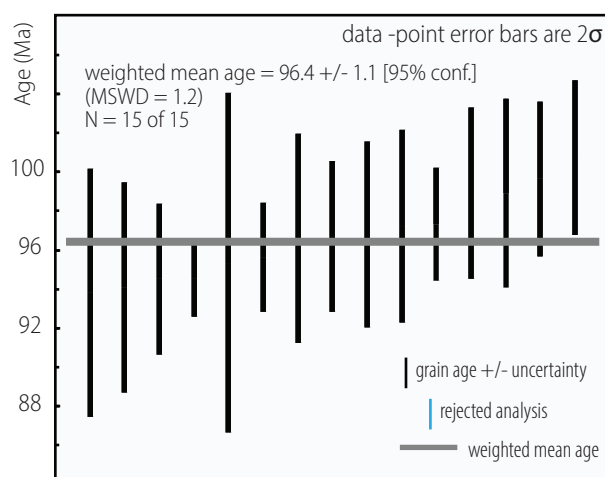

A-71

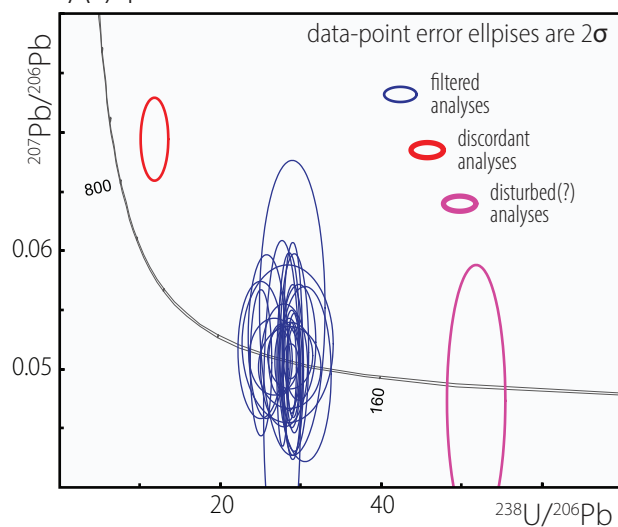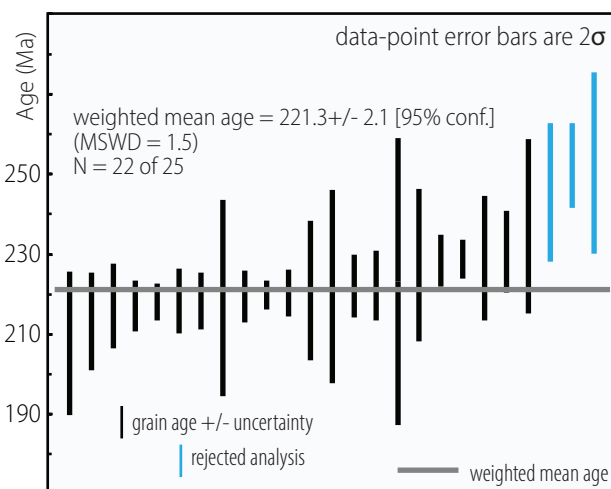

B34A

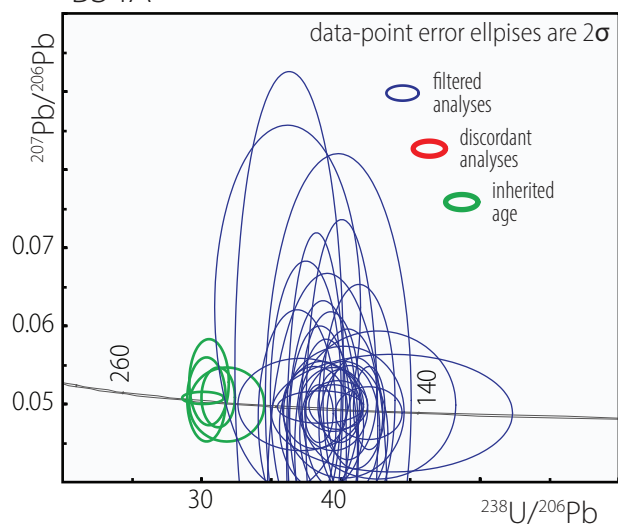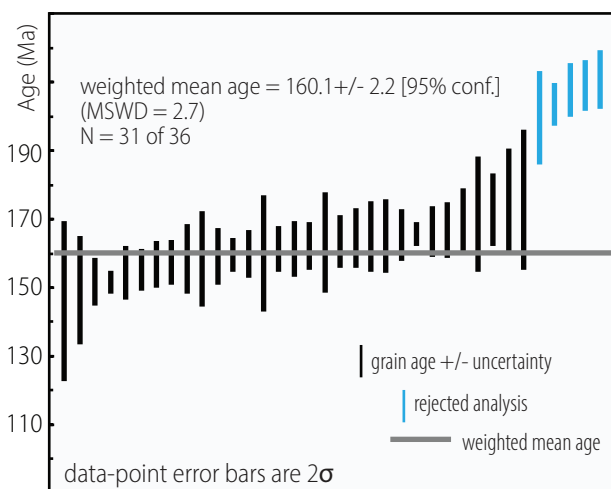

BL18-1

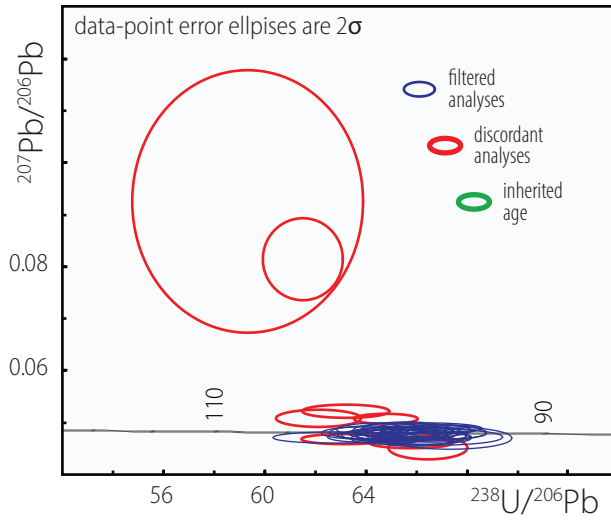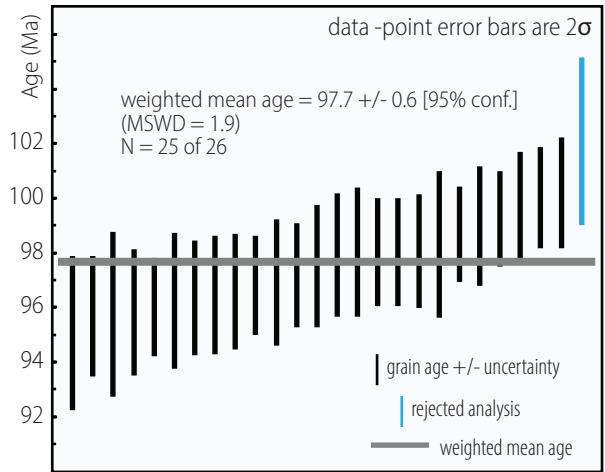

C-200

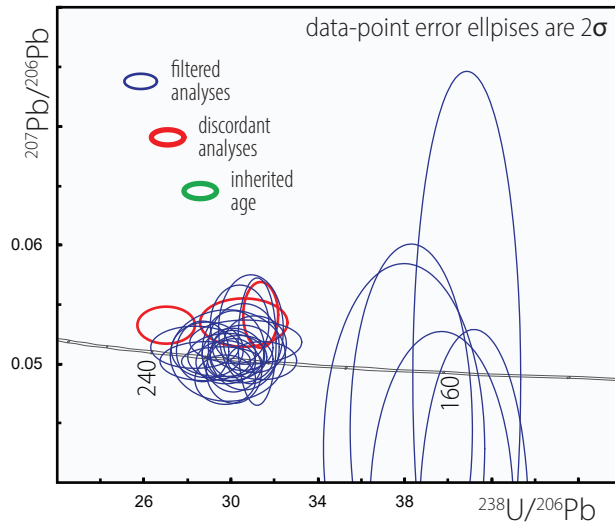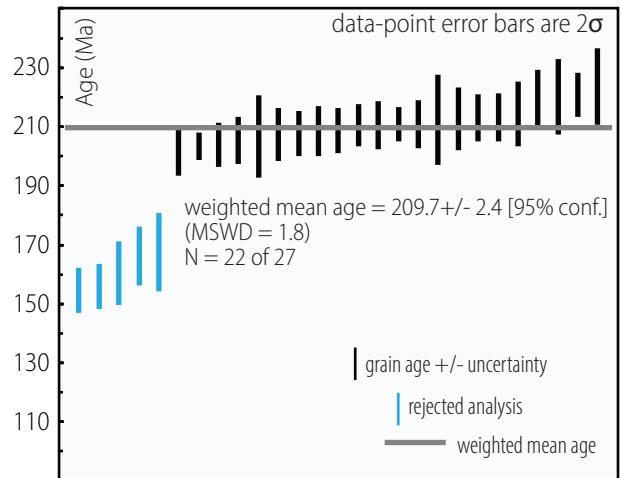

C-59

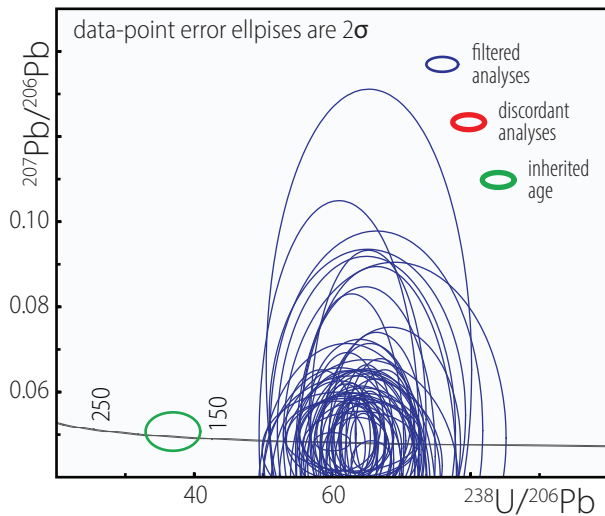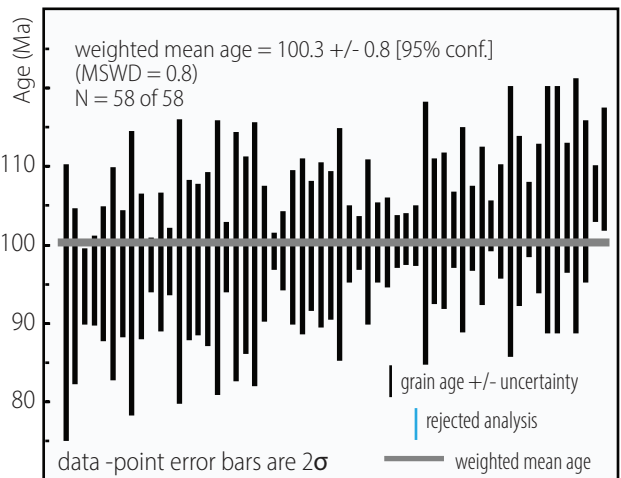

D-142

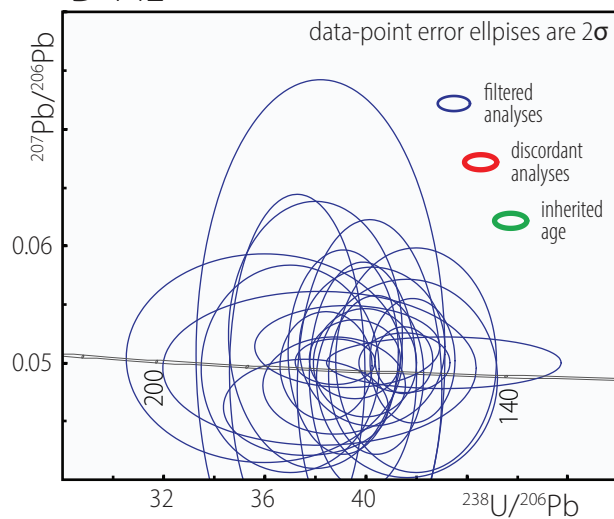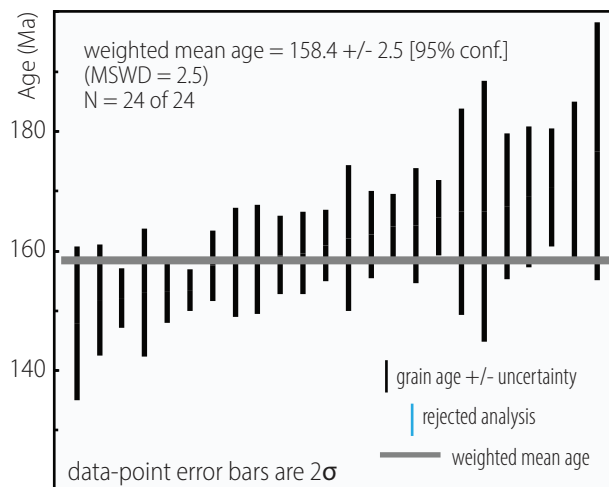

DL16-21

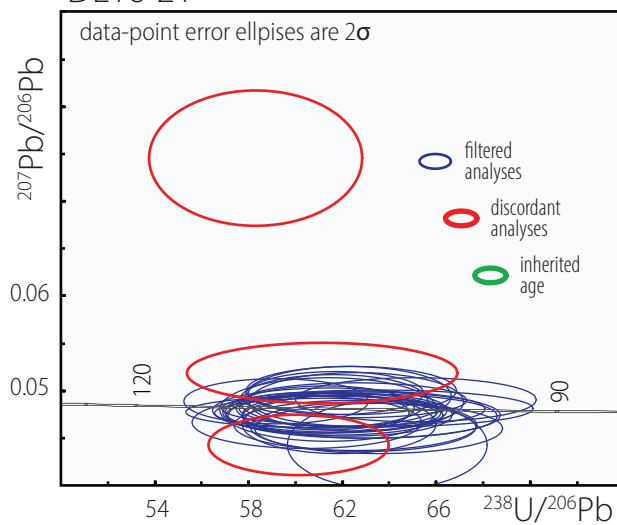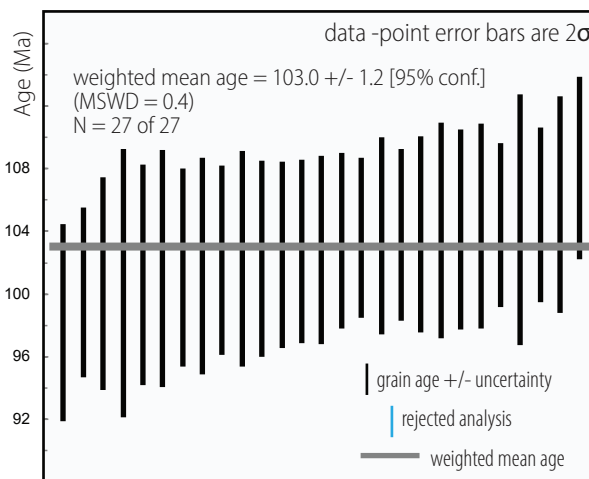

DL16-26

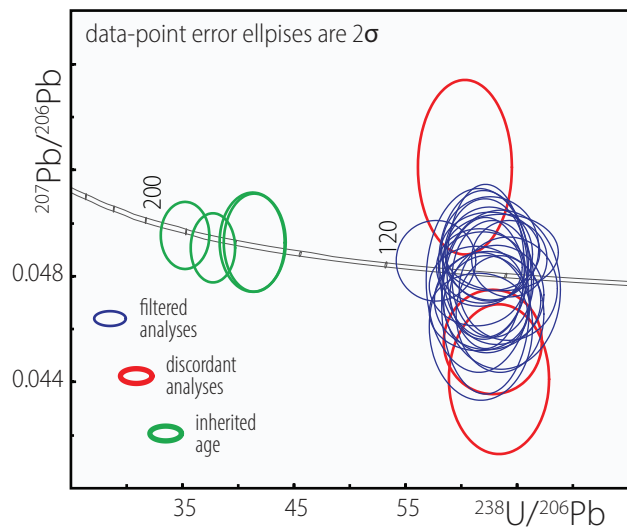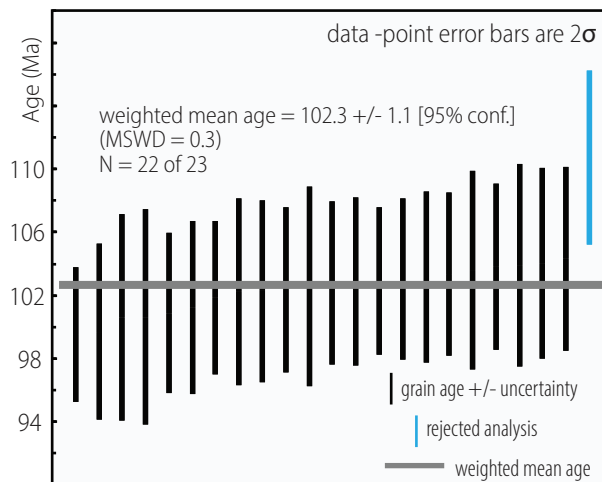

### DL16-88

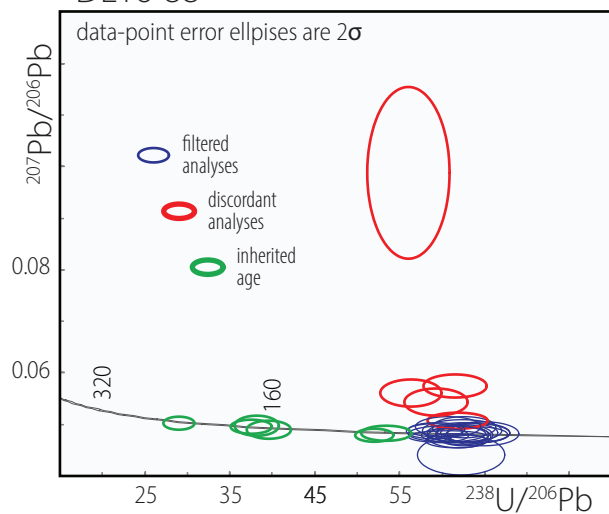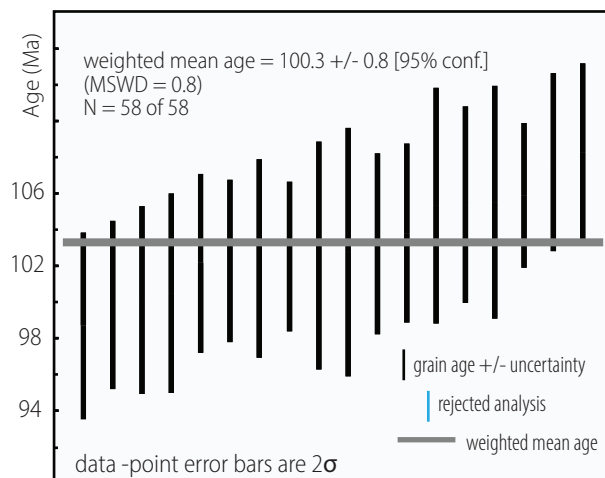

### FG-2-10

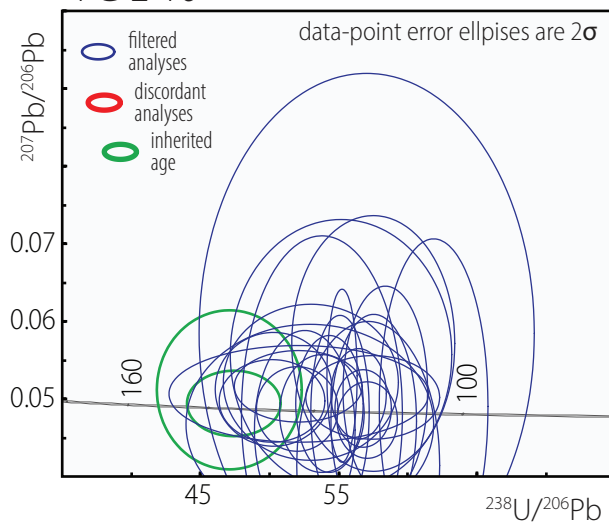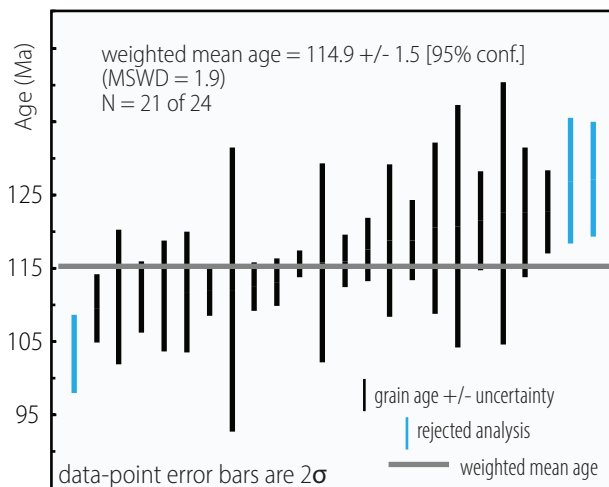

### HC18-AW-13

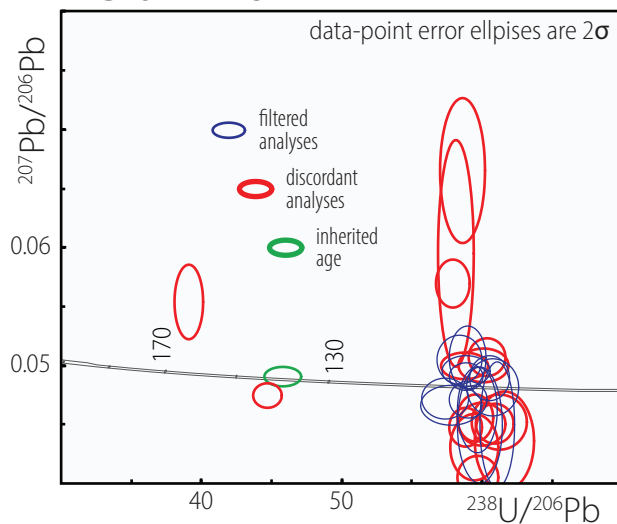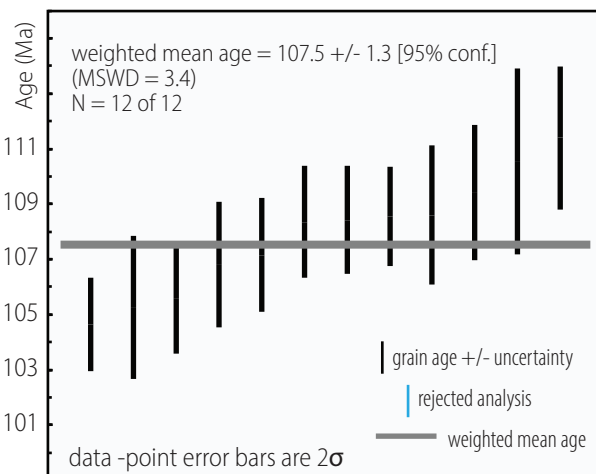

HC18-AW-17

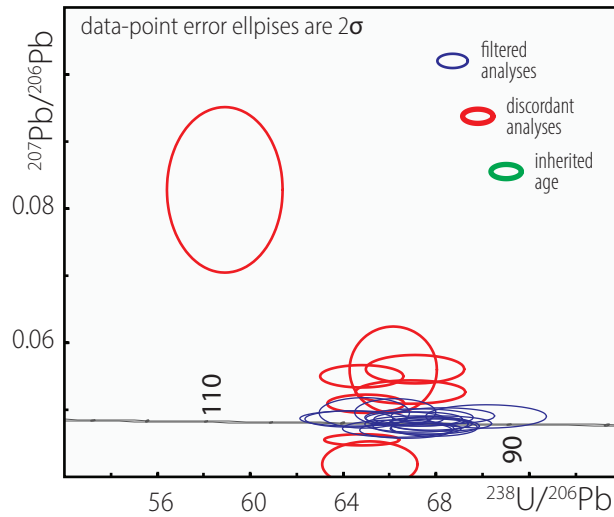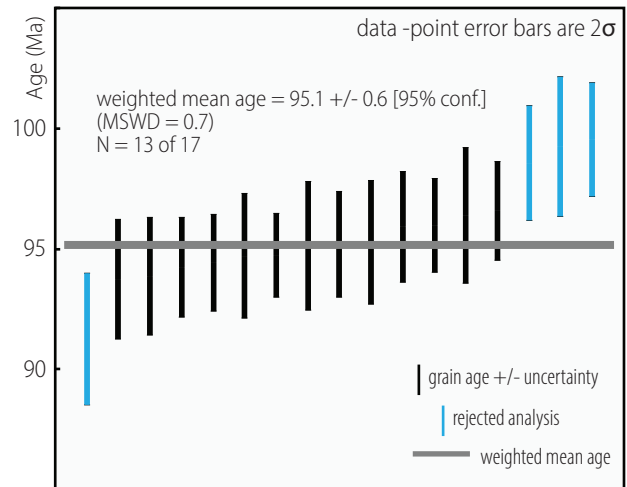

HL16-61

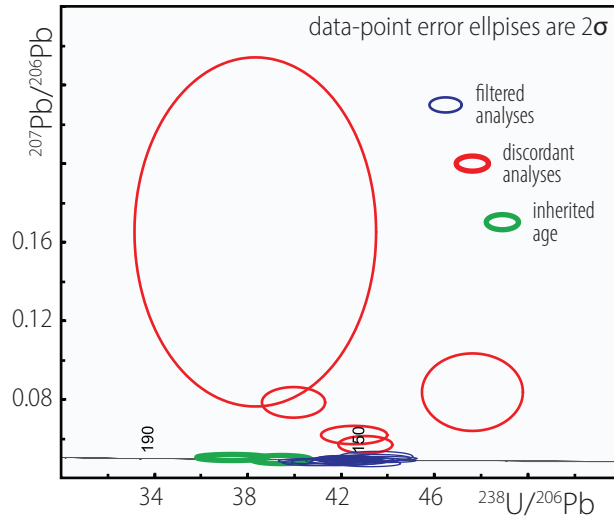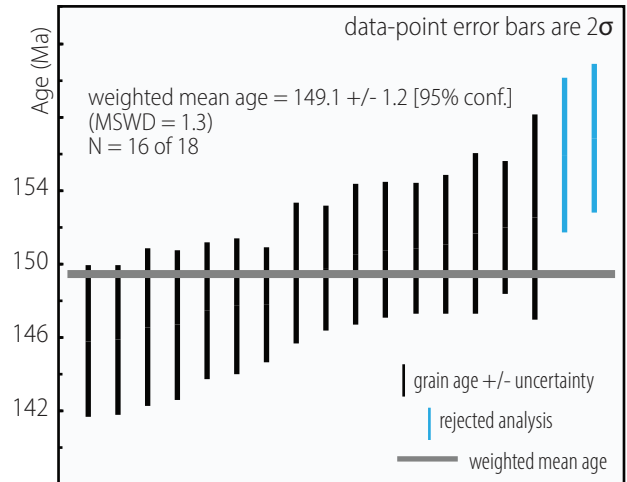

HLA-51

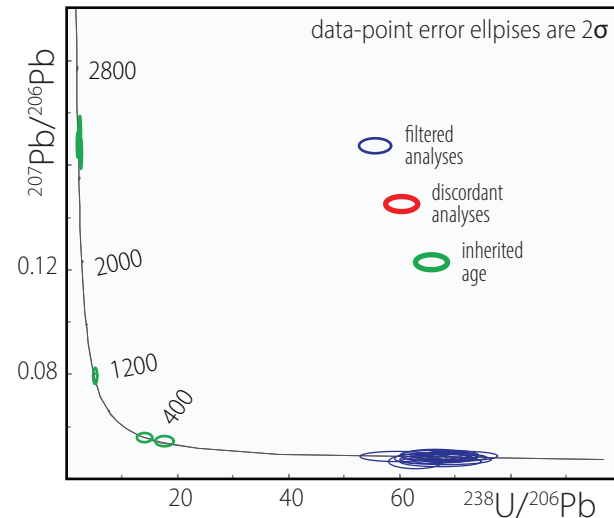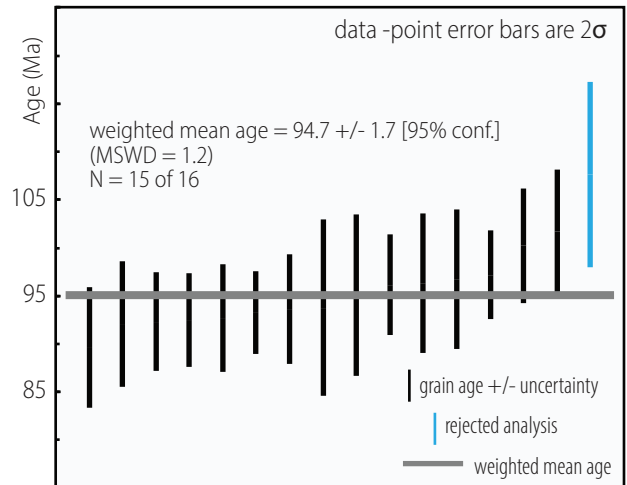

J17-567

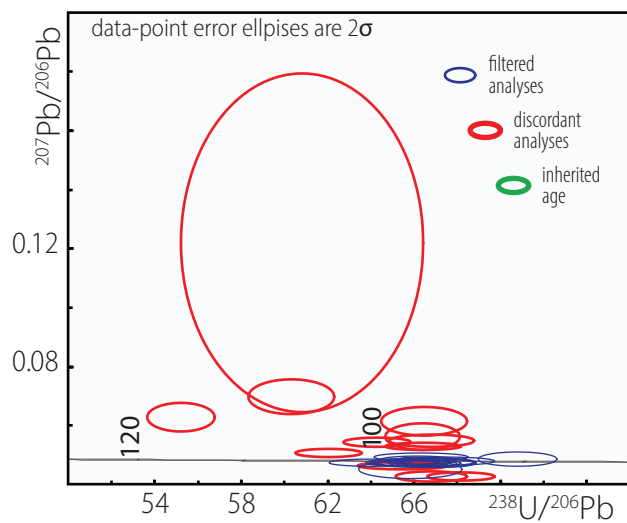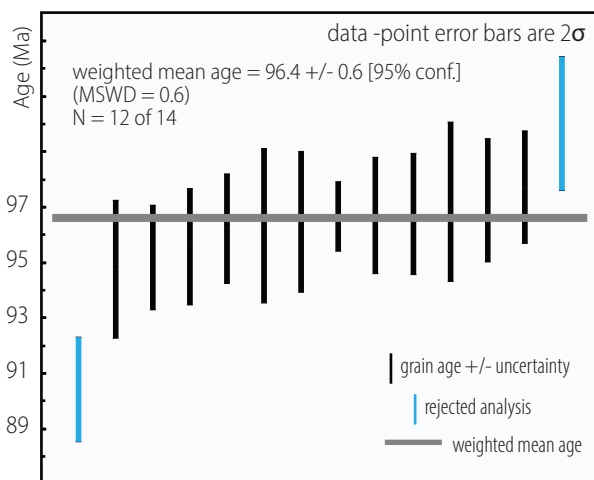

J17-568A

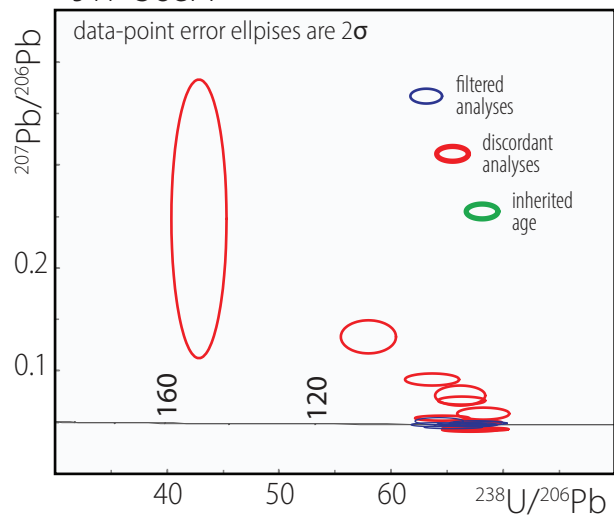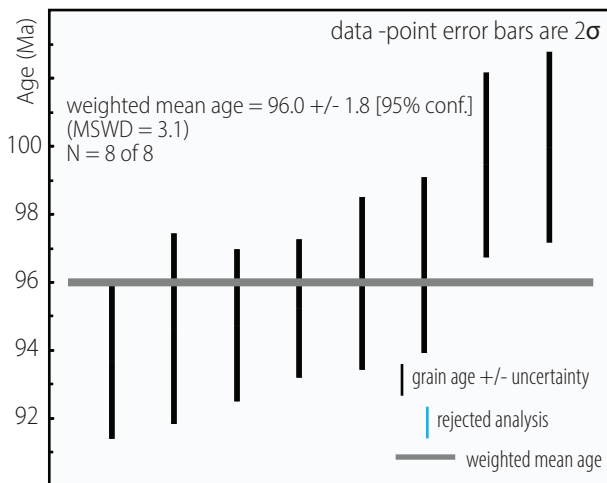

NR15-46

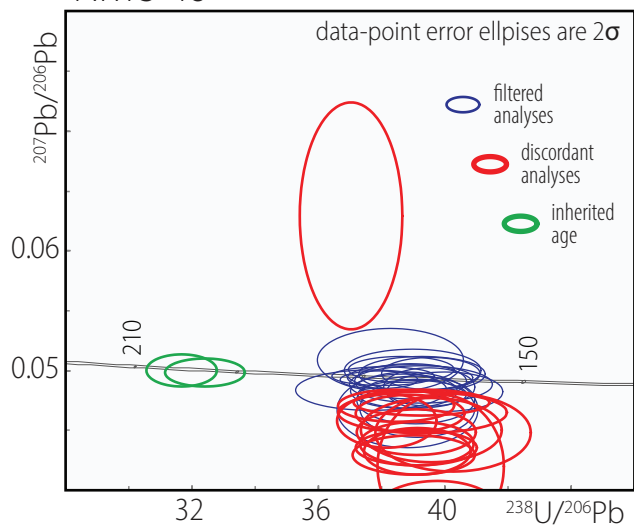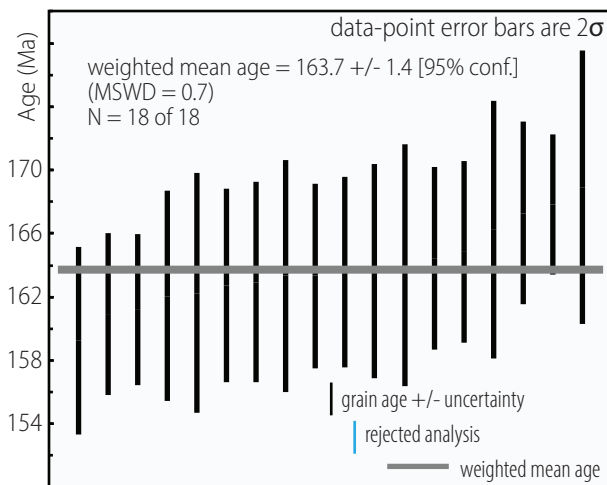

NR15-188

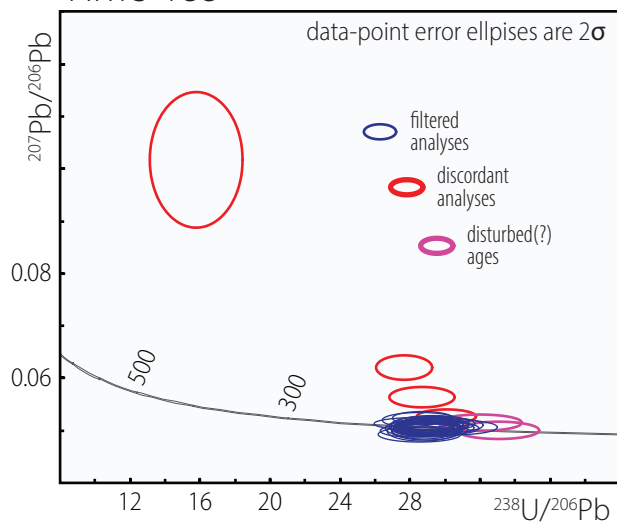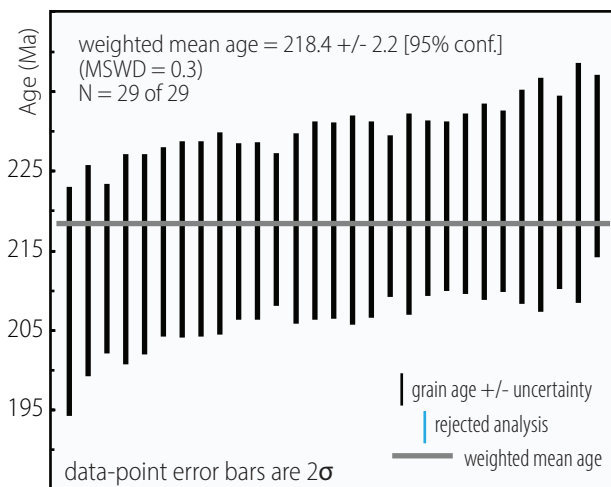

NR15-193

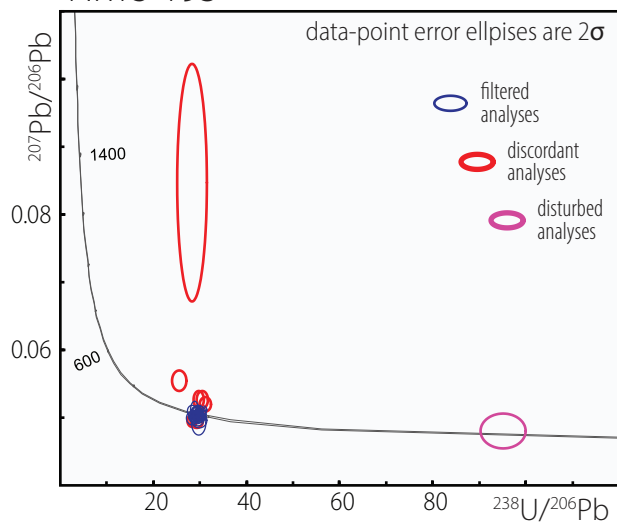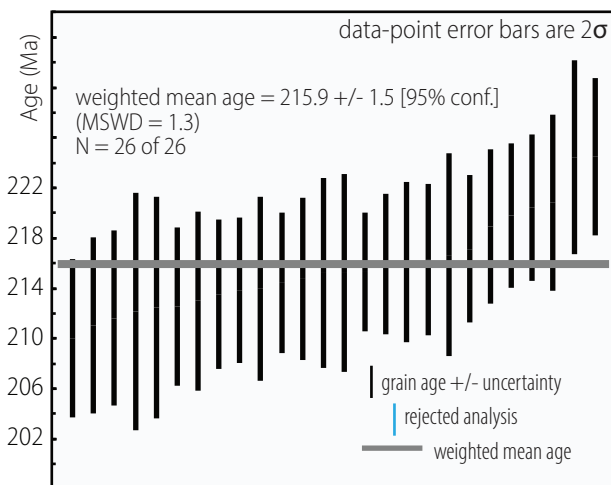

NR16-1

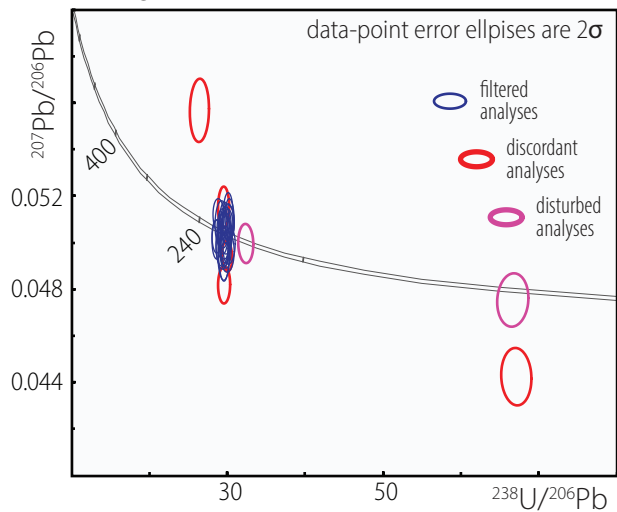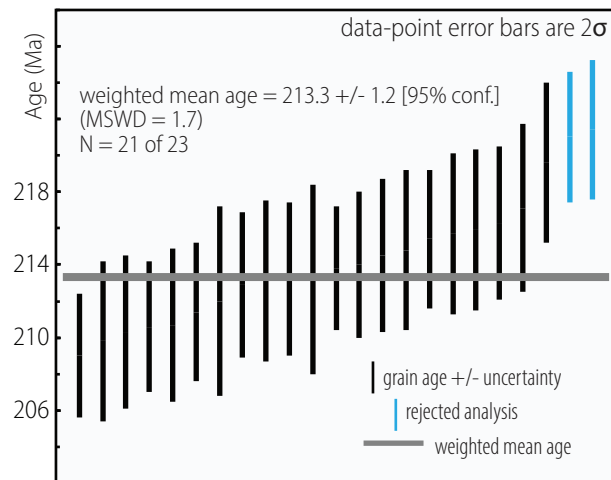



RR16-S-33

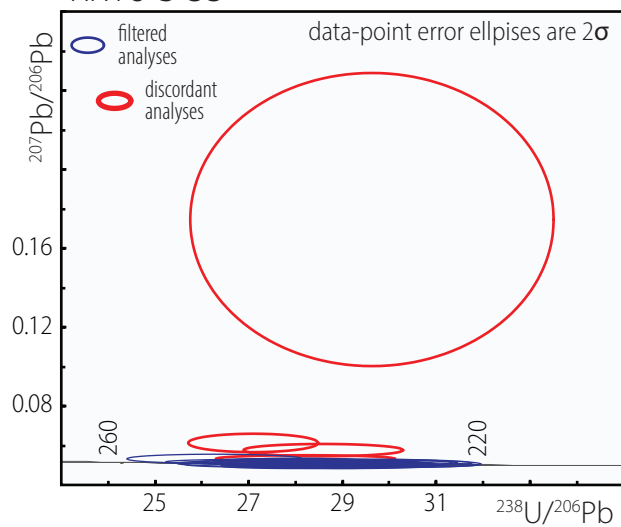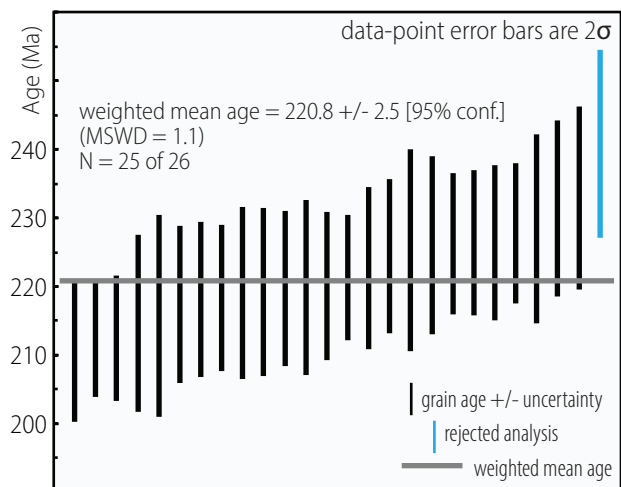

VT15-22-B

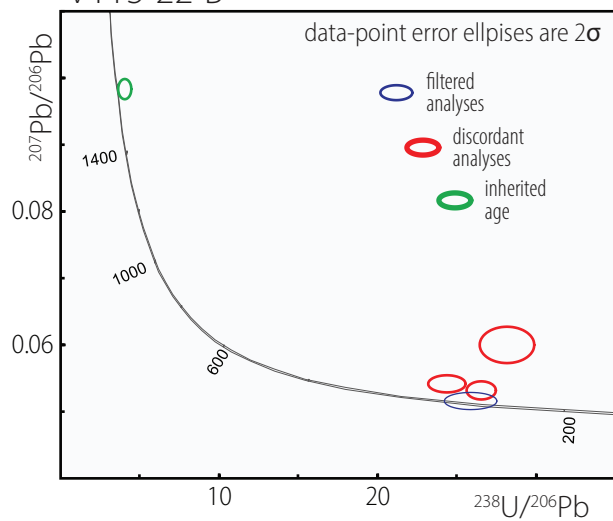

NO INTERPRETED SAMPLE  
ROCK AGE DUE TO SINGLE  
CONCORDANT ANALYSIS

VT16-3-A

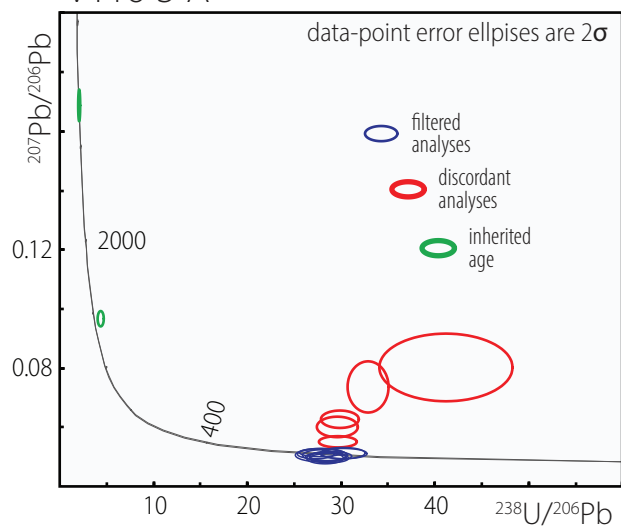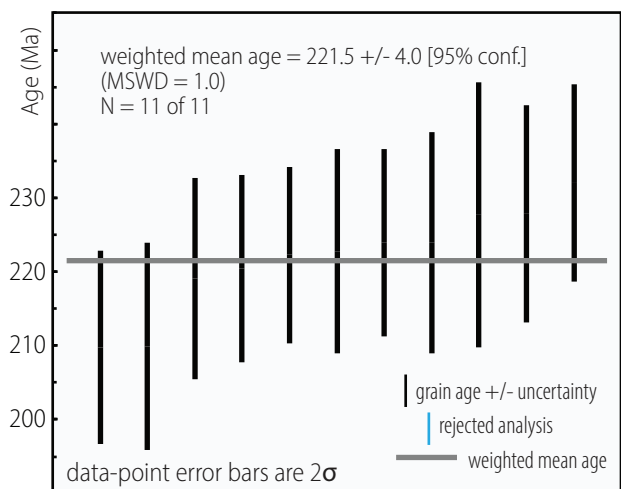

NR16-1

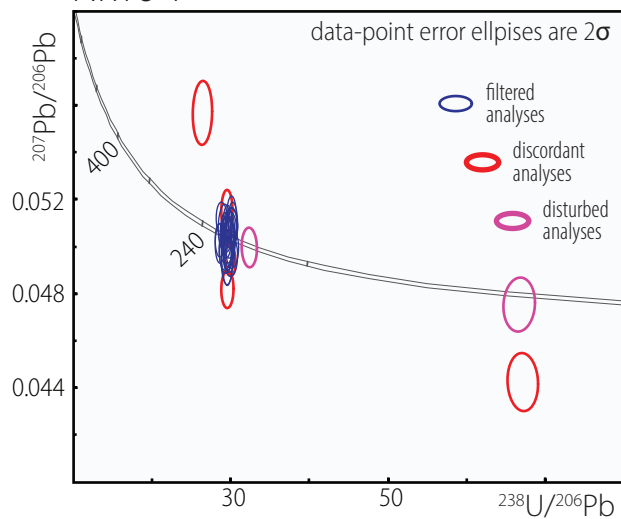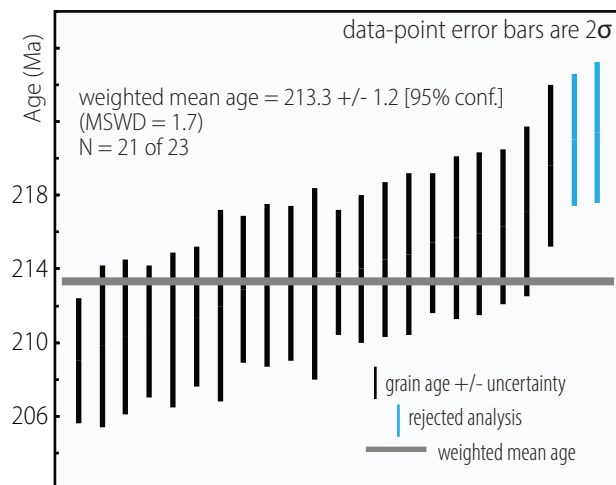

1-19

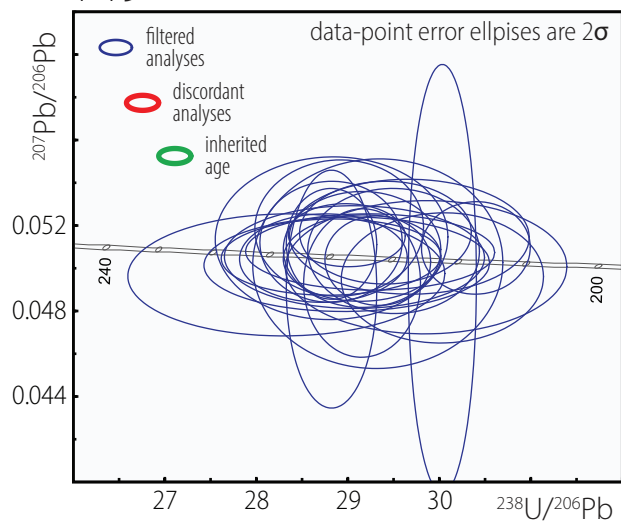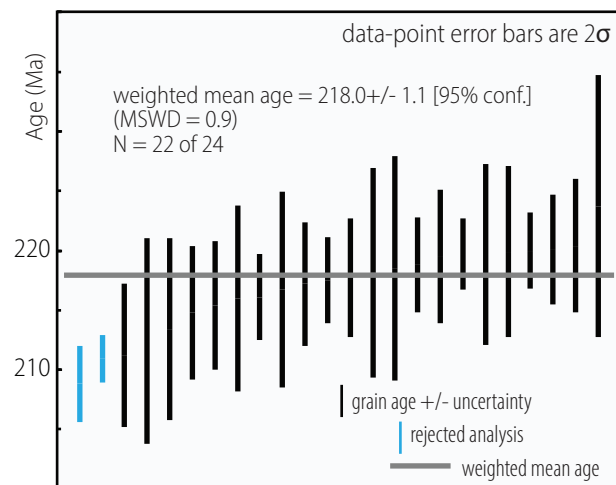

Supplement: Supplementary file 1 [file 1]
