# Supplementary material
Source: publisher figshare collection journal article supplement (https://gsapubs.figshare.com/articles/dataset/_/20443206)
Supplement: Supplementary file 1 [file 1]

## Sheet: 1 Data Source
Data Source Information		Attia, S., Paterson, S.R., Jiang, D., and Miller, R.B., 2022, Spatiotemporally heterogeneous deformation, indirect tectonomagmatic links, and lithospheric evolution during orogenic activity coeval with an arc flare-up: Geosphere, v. 18, https://doi.org/10.1130/GES02478.1
TITLE	descriptive title of the dataset	New zircon U-Pb geochronology data from central Sierra Nevada intrusions and metamorphic wallrocks, eastern California
ABSTRACT	brief description of dataset, please aim for <250 words	This dataset comprises new zircon U-Pb isotopic age analyses, conducted by LA-ICPMS at the University of Arizona LaseChron Center, from intrusions and metavolcanic strata of the central Sierra Nevada in eastern California, USA.
AUTHOR	name of the author(s) of the dataset (Last, First)	Attia, S., Paterson, S.R., Jiang, D., and Miller, R.B.
Institution	institution of the author	New Mexico Institute of Mining and Technology
Release Date	date when the data is available to the public (if left blank, available now)	2021-10-01
Creator	person who fills out this template	Snir Attia
CONTACT INFO	contact email for the creator of the template	snir.attia@nmt.edu
Related Publication #1	information about a publication related to the dataset (e.g. journal article that cites all or part of the dataset)
Title		Spatiotemporally heterogeneous deformation, indirect tectonomagmatic links, and lithospheric evolution during orogenic activity coeval with an arc flare-up
Authors		Attia, S., Paterson, S.R., Jiang, D., and Miller, R.B.
Publication Year		in review
Journal
Volume
Issue
Pages
DOI

## Sheet: 2 Samples
Sample Information
IDENTIFICATION		LOCATION				DESCRIPTION			More info (add more columns if you can provide more information)
SAMPLE NAME	IGSN	LATITUDE	LONGITUDE	ELEVATION	LOCATION KEYWORDS	LITHOLOGY	age	depth in core	texture	cruise	collection date	collector
name given by collector	unique ID assigned by SESAR	decimal degrees, negative to indicate S	decimal degrees, negative to indicate W	in meters with respect to sea level	keywords for searches ex.: East Pacific Rise, Sierra Nevada	rock type, e.g. basalt	age	depth in core, if applicable, in cm
		Please add columns for off-bottom locations if needed (e.g. for dredges)					age unit: (geologic age)
HLA-51	IESNI001G	37.6218	-119.166		eastern central Sierra Nevada	hypabyssal andesite	Late Cretaceous
HC18-AW-17	IESNI001H	37.6069	-119.2		eastern central Sierra Nevada	granodiorite	Late Cretaceous
J17-568A	IESNI001I	37.83	-119.129		eastern central Sierra Nevada	granodiorite	Late Cretaceous
J17-567	IESNI001J	37.7871	-119.068		eastern central Sierra Nevada	granite	Late Cretaceous
A-145	IESNI001K	37.7293	-119.213		eastern central Sierra Nevada	meta-rhyolite	Upper Cretaceous
BL18-1	IESNI001L	37.7668	-119.335		eastern central Sierra Nevada	granodiorite	Late Cretaceous
C-59	IESNI001M	37.7358	-119.218		eastern central Sierra Nevada	meta-andesite	Lower to Upper Cretaceous
DL16-26	IESNI001N	37.7358	-119.215		eastern central Sierra Nevada	meta-dacite	Lower Cretaceous
DL16-21	IESNI001O	37.7257	-119.205		eastern central Sierra Nevada	meta-dacite	Lower Cretaceous
DL16-88	IESNI001P	37.7353	-119.209		eastern central Sierra Nevada	meta-rhyolite	Lower Cretaceous
HC18-AW-13	IESNI001Q	37.6086	-119.21		eastern central Sierra Nevada	meta-dacite	Lower Cretaceous
FG-2-10	IESNI001R	37.3525	-119.746		western central Sierra Nevada	meta-volcanic	Lower Cretaceous
HL16-61	IESNI001S	37.625	-119.129		eastern central Sierra Nevada	granodiorite	Late Jurassic
D-142	IESNI001T	37.7169	-119.169		eastern central Sierra Nevada	meta-rhyolite	Upper Jurassic
C-200	IESNI001U	37.7547	-119.159		eastern central Sierra Nevada	meta-andesite	Upper Jurassic
B34A	IESNI001V	37.7532	-119.186		eastern central Sierra Nevada	meta-andesite	Upper Jurassic
NR15-46	IESNI001W	37.7893	-119.192		eastern central Sierra Nevada	meta-andesite	Middle to Upper Jurassic
VT16-11	IESNI001X	37.6906	-119.146		eastern central Sierra Nevada	meta-rhyolite	Middle Jurassic
NR16-1	IESNI001Y	37.8479	-119.22		eastern central Sierra Nevada	granodiorite	Late Triassic
NR15-193	IESNI001Z	37.8433	-119.213		eastern central Sierra Nevada	meta-volcanic	Upper Triassic
1-19	IESNI0020	37.98	-119.293		eastern central Sierra Nevada	meta-rhyolite	Upper Triassic
NR15-188	IESNI0021	37.842	-119.237		eastern central Sierra Nevada	porphyritic granite	Late Triassic
RR16-S-33	IESNI0022	37.6687	-119.069		eastern central Sierra Nevada	meta-rhyodacite	Upper Triassic
A-71	IESNI0023	37.7378	-119.188		eastern central Sierra Nevada	meta-rhyolite	Upper Triassic
VT16-3-a	IESNI0024	37.6978	-119.123		eastern central Sierra Nevada	meta-andesite	Upper Triassic
2-1	IESNI0025	37.9727	-119.278		eastern central Sierra Nevada	diorite	Late Triassic
3-93	IESNI0026	37.9619	-119.289		eastern central Sierra Nevada	meta-volcanic	Upper Triassic
VT15-22-b	IESNI0027	37.6911	-119.151		eastern central Sierra Nevada	meta-andesite	Upper Jurassic

## Sheet: 3 Data
Analytical Data
								PARAMETER [list]	U	Pb206_Pb204	U_Th	Pb206_Pb207	Pb206_Pb207_21D	Pb207_U235	Pb207_U235_1SD	Pb206_U238	Pb206_U238_1SD	error correlation	Pb206_U238 Age	Pb206_U238 Age_1SD	Pb207_U235 Age	Pb207_U235 Age_1SD	Pb206_Pb207 Age	Pb206_Pb207 Age_1SD	BestAge	BestAge_1SD	Concardance	Filter	Comment
								METHOD CODE [more info]:	1	1	2	1	1	1	1	1	1	2	1	1	1	1	1	1	2	2	2	2	2
								UNIT [list]:	ppm				%		%		%		Ma	Ma	Ma	Ma	Ma	Ma	Ma	Ma	%
SAMPLE NAME	IGSN	ANALYZED MATERIAL	species	Analysis	size fraction	sample preparation	chemical treatment	number of replicates
must match a sample on the SAMPLES tab column A	must match an IGSN on the SAMPLES tab column B	e.g. whole rock, volcanic glass, mineral, fossil	if mineral or fossil e.g. plagioclase, Cibicidoides wuellerstorfi	e.g. spot number	e.g. <2mm	e.g. crushed in agate mill, sieved at 500 microns	e.g. whole rock samples were dissolved in 0.1M HF + 5.0M HNO3	if average, leave blank if 1
HC18-AW-17	IESNI001H	mineral	zircon	HC18-AW-17-2					888.735	203179	1.14018	19.9554	0.91829	0.101926	1.40099	0.0147582	1.05807	0.755231	94.4421	0.991979	98.5525	1.31582	199.17	21.3447	94.4421	0.991979	NA	exclude	off concordia
HC18-AW-17	IESNI001H	mineral	zircon	HC18-AW-17-4					183.195	20589.1	2.1921	19.2537	1.39992	0.106651	1.79443	0.0148994	1.12259	0.625596	95.339	1.06239	102.897	1.75595	281.708	32.0336	95.339	1.06239	NA	exclude	off concordia
HC18-AW-17	IESNI001H	mineral	zircon	HC18-AW-17-5					868.181	3500.98	3.03869	17.8253	1.50471	0.115237	1.97493	0.0149045	1.27913	0.647685	95.3714	1.21094	110.745	2.07208	455.37	33.3931	95.3714	1.21094	NA	exclude	off concordia
HC18-AW-17	IESNI001H	mineral	zircon	HC18-AW-17-6					478.352	4921.56	1.9106	18.9858	1.33256	0.108517	1.95792	0.0149491	1.43449	0.732659	95.655	1.36203	104.608	1.94618	313.684	30.3176	95.655	1.36203	NA	exclude	off concordia
HC18-AW-17	IESNI001H	mineral	zircon	HC18-AW-17-8					1171.68	2761.6	1.09397	17.8691	4.69709	0.116596	4.83571	0.0151172	1.14955	0.23772	96.7227	1.10357	111.981	5.12721	449.898	104.393	96.7227	1.10357	NA	exclude	off concordia
HC18-AW-17	IESNI001H	mineral	zircon	HC18-AW-17-9					164.737	1971.52	2.54477	23.8297	3.30642	0.08878	3.54844	0.0153504	1.28804	0.362987	98.2035	1.25531	86.3662	2.93795	NA	NA	98.2035	1.25531	NA	exclude	off concordia
HC18-AW-17	IESNI001H	mineral	zircon	HC18-AW-17-10					683.862	31552.9	2.77126	19.6186	1.09547	0.108119	1.52154	0.0153907	1.05594	0.693997	98.459	1.03177	104.243	1.5074	238.542	25.2621	98.459	1.03177	NA	exclude	off concordia
HC18-AW-17	IESNI001H	mineral	zircon	HC18-AW-17-11					424.858	19587.6	1.70595	18.1737	1.2406	0.117045	1.68112	0.0154342	1.13449	0.674845	98.7355	1.11161	112.39	1.78859	412.229	27.7383	98.7355	1.11161	NA	exclude	off concordia
HC18-AW-17	IESNI001H	mineral	zircon	HC18-AW-17-12					688.92	4659.65	2.438	21.9513	0.803508	0.0969051	1.29471	0.0154346	1.01521	0.784122	98.7375	0.994758	93.9155	1.1614	NA	NA	98.7375	0.994758	NA	exclude	off concordia
HC18-AW-17	IESNI001H	mineral	zircon	HC18-AW-17-13					321.045	2996.6	3.37023	12.0588	6.07404	0.194004	6.31407	0.0169747	1.72437	0.273099	108.507	1.85541	180.04	10.4174	1266.67	118.707	108.507	1.85541	NA	exclude	off concordia
HC18-AW-17	IESNI001H	mineral	zircon	HC18-AW-17-14					348.055	44249	1.23513	20.4058	1.45015	0.0962676	2.09452	0.0142535	1.51133	0.721561	91.2351	1.36915	93.3252	1.86758	147.064	33.9839	91.2351	1.36915	NA		isolated young age
HC18-AW-17	IESNI001H	mineral	zircon	HC18-AW-17-1					707.906	35957.9	1.46391	20.3823	1.00794	0.0990272	1.67336	0.0146452	1.33574	0.798239	93.7242	1.24286	95.8779	1.53097	149.8	23.6016	93.7242	1.24286	NA
HC18-AW-17	IESNI001H	mineral	zircon	HC18-AW-17-15					739.35	10445.8	1.73576	20.8476	0.99999	0.0969506	1.64989	0.0146654	1.31231	0.795392	93.8527	1.22271	93.9576	1.48064	96.6076	23.6797	93.8527	1.22271	NA
HC18-AW-17	IESNI001H	mineral	zircon	HC18-AW-17-16					743.509	8710.49	1.09524	21.1213	1.10206	0.0960697	1.56495	0.0147229	1.1111	0.709988	94.2183	1.03924	93.1419	1.39277	65.6729	26.2201	94.2183	1.03924	NA
HC18-AW-17	IESNI001H	mineral	zircon	HC18-AW-17-17					1142.24	15396.6	1.03757	20.8411	0.78736	0.0975851	1.33182	0.0147568	1.07415	0.80653	94.4333	1.00696	94.5447	1.20232	97.3323	18.6404	94.4333	1.00696	NA
HC18-AW-17	IESNI001H	mineral	zircon	HC18-AW-17-18					598.586	15666.2	1.65757	20.9946	1.04854	0.0971395	1.73145	0.0147976	1.37786	0.795783	94.6924	1.29519	94.1325	1.55659	79.9438	24.8969	94.6924	1.29519	NA
HC18-AW-17	IESNI001H	mineral	zircon	HC18-AW-17-19					667.634	7330.97	1.60669	21.1732	0.707001	0.0963614	1.16472	0.014804	0.925598	0.794693	94.7329	0.870435	93.412	1.03945	59.7979	16.8384	94.7329	0.870435	NA
HC18-AW-17	IESNI001H	mineral	zircon	HC18-AW-17-3					361.043	32780.8	1.64702	20.4443	1.11417	0.100218	1.79975	0.0148664	1.41341	0.785338	95.1296	1.3347	96.9775	1.6646	142.66	26.1366	95.1296	1.3347	NA
HC18-AW-17	IESNI001H	mineral	zircon	HC18-AW-17-20					714.257	27920.6	1.34469	20.5471	0.93283	0.0997752	1.48749	0.0148752	1.15864	0.778924	95.1853	1.09475	96.5688	1.37026	130.893	21.9345	95.1853	1.09475	NA
HC18-AW-17	IESNI001H	mineral	zircon	HC18-AW-17-21					522.986	10529.3	1.80222	20.8736	1.06374	0.0983002	1.72626	0.0148881	1.35957	0.787581	95.2676	1.2857	95.2061	1.56881	93.6593	25.1811	95.2676	1.2857	NA
HC18-AW-17	IESNI001H	mineral	zircon	HC18-AW-17-22					663.95	7159.01	1.41731	21.3003	1.02757	0.0969972	1.58635	0.0149911	1.20855	0.761843	95.9215	1.15068	94.0008	1.42424	45.5057	24.5573	95.9215	1.15068	NA
HC18-AW-17	IESNI001H	mineral	zircon	HC18-AW-17-23					702.782	12012	1.58905	20.5084	0.845759	0.100808	1.32716	0.0150008	1.02276	0.770641	95.983	0.974407	97.5215	1.23406	135.296	19.8622	95.983	0.974407	NA
HC18-AW-17	IESNI001H	mineral	zircon	HC18-AW-17-24					245.815	5113.57	2.48687	21.1724	1.16616	0.0980512	1.88059	0.015063	1.47537	0.784521	96.3781	1.41135	94.9759	1.70512	59.9192	27.8021	96.3781	1.41135	NA
HC18-AW-17	IESNI001H	mineral	zircon	HC18-AW-17-7					779.084	11344.5	2.02259	20.1399	1.72008	0.103297	2.02774	0.0150951	1.07381	0.529562	96.582	1.02938	99.8156	1.9277	177.725	40.1158	96.582	1.02938	NA
HC18-AW-17	IESNI001H	mineral	zircon	HC18-AW-17-25					497.693	8230.58	1.69838	20.1632	1.91353	0.105314	2.26895	0.0154075	1.21924	0.537359	98.5659	1.19262	101.67	2.19512	175.036	44.6399	98.5659	1.19262	NA		isolated older age
HC18-AW-17	IESNI001H	mineral	zircon	HC18-AW-17-26					641.528	37256.7	1.95725	20.5368	0.969943	0.104135	1.76478	0.0155173	1.47433	0.83542	99.2628	1.45225	100.586	1.69003	132.037	22.8314	99.2628	1.45225	NA		isolated older age
HC18-AW-17	IESNI001H	mineral	zircon	HC18-AW-17-27					574.869	5176.66	2.07664	20.5315	0.990719	0.104455	1.55853	0.0155611	1.20312	0.771957	99.5406	1.18839	100.881	1.49668	132.685	23.285	99.5406	1.18839	NA		isolated older age
A-145	IESNI001K	mineral	zircon	A-145-28					1005.64	3597.1	1.18818	16.3203	8.04888	0.128242	9.09159	0.0151796	4.22759	0.465	97.1186	4.075	122.517	10.4934	648.84	173.111	97.1186	4.075	NA	exclude	off concordia
A-145	IESNI001K	mineral	zircon	A-145-32					572.418	3199.97	0.970158	18.6252	11.5279	0.129571	12.0591	0.0175028	3.5398	0.293538	111.855	3.92527	123.713	14.0465	358.077	260.969	111.855	3.92527	NA	exclude	inheritance
A-145	IESNI001K	mineral	zircon	A-145-8					430.993	1816.32	2.69774	22.7381	19.5649	0.120705	19.9009	0.0199057	3.64142	0.182978	127.06	4.58149	115.711	21.7672	-111.847	485.705	127.06	4.58149	NA	exclude	inheritance
A-145	IESNI001K	mineral	zircon	A-145-6					1709.25	12136.6	4.83947	19.7346	3.2761	0.150481	4.75628	0.0215382	3.4481	0.724957	137.37	4.68654	142.336	6.31692	225.935	75.7467	137.37	4.68654	NA	exclude	inheritance
A-145	IESNI001K	mineral	zircon	A-145-23					904.297	13629.1	0.517422	17.5659	8.55949	0.19902	9.7343	0.0253552	4.63592	0.476246	161.412	7.39004	184.297	16.4075	488.783	189.163	161.412	7.39004	NA	exclude	inheritance
A-145	IESNI001K	mineral	zircon	A-145-5					1122.17	2766.98	2.25675	21.109	5.52261	0.0957645	6.49115	0.0146613	3.41113	0.525504	93.8264	3.17736	92.8591	5.76028	68.0991	131.494	93.8264	3.17736	NA
A-145	IESNI001K	mineral	zircon	A-145-12					1005.46	2072.97	2.33164	23.7127	6.47211	0.0854887	7.0796	0.0147024	2.86923	0.405281	94.0879	2.67999	83.2922	5.66144	-216.259	162.824	94.0879	2.67999	NA
A-145	IESNI001K	mineral	zircon	A-145-16					721.894	1777.71	2.56308	23.7807	6.63612	0.0856331	6.94527	0.0147695	2.04906	0.29503	94.5139	1.92252	83.4272	5.56265	-223.465	167.196	94.5139	1.92252	NA
A-145	IESNI001K	mineral	zircon	A-145-14					2118.68	4588.65	1.34031	21.3697	3.4312	0.095329	3.58384	0.0147748	1.03478	0.288735	94.5478	0.971221	92.4555	3.16709	38.7662	82.1012	94.5478	0.971221	NA
A-145	IESNI001K	mineral	zircon	A-145-29					968.343	5691.3	1.19525	16.7527	18.2455	0.122621	18.8137	0.0148987	4.58894	0.243914	95.3347	4.34266	117.445	20.8688	592.404	398.541	95.3347	4.34266	NA
A-145	IESNI001K	mineral	zircon	A-145-30					1916.67	6575.79	1.3638	20.6783	5.80192	0.0996443	5.98291	0.014944	1.46045	0.244104	95.6224	1.38621	96.448	5.50487	116.905	136.888	95.6224	1.38621	NA
A-145	IESNI001K	mineral	zircon	A-145-33					1381.81	5654.28	2.32682	21.3936	6.16959	0.0973157	6.77248	0.0150996	2.79333	0.412453	96.6105	2.67853	94.2955	6.09866	36.0972	147.795	96.6105	2.67853	NA
A-145	IESNI001K	mineral	zircon	A-145-9					1743.73	4411.81	1.47757	22.0772	3.53673	0.0943853	4.06274	0.0151129	1.99937	0.492122	96.6951	1.91886	91.5802	3.55783	-39.7087	85.9003	96.6951	1.91886	NA
A-145	IESNI001K	mineral	zircon	A-145-20					937.763	3126.09	2.37081	22.4587	7.60826	0.0928835	7.99903	0.0151294	2.46957	0.308734	96.8001	2.37269	90.1859	6.90301	-81.4851	186.479	96.8001	2.37269	NA
A-145	IESNI001K	mineral	zircon	A-145-2					996.05	3475.92	1.66006	20.8366	9.54882	0.100568	9.88398	0.015198	2.55206	0.258202	97.2358	2.4629	97.3008	9.17103	98.8842	226.358	97.2358	2.4629	NA
A-145	IESNI001K	mineral	zircon	A-145-3					1301.41	2528.9	1.86879	21.0707	3.63309	0.0995231	3.92895	0.0152091	1.49577	0.380705	97.3058	1.44454	96.336	3.611	72.399	86.4024	97.3058	1.44454	NA
A-145	IESNI001K	mineral	zircon	A-145-11					986.52	5955.57	1.13321	18.3575	7.4423	0.116115	7.77034	0.0154598	2.23393	0.287494	98.8976	2.19244	111.544	8.20843	390.656	167.237	98.8976	2.19244	NA
A-145	IESNI001K	mineral	zircon	A-145-18					796.604	1991.2	2.81218	24.2034	10.2556	0.0880941	10.546	0.015464	2.4577	0.233046	98.9243	2.4127	85.7264	8.66976	-268.005	261.009	98.9243	2.4127	NA
A-145	IESNI001K	mineral	zircon	A-145-7					800.368	2050.74	1.17248	23.2295	7.57237	0.0924644	7.83268	0.0155781	2.00254	0.255665	99.6484	1.98016	89.7965	6.73154	-164.77	188.645	99.6484	1.98016	NA
A-145	IESNI001K	mineral	zircon	A-145-10					1460.7	5802.57	1.55273	19.0672	3.81566	0.113854	4.29926	0.0157447	1.98101	0.46078	100.706	1.9795	109.485	4.46218	304.924	86.9646	100.706	1.9795	NA
J17-567	IESNI001J	mineral	zircon	-June17567 Spot 7					396.61	2571.01	2.02279	23.3867	1.32578	0.08642	1.62325	0.0146646	0.936625	0.577005	93.8479	0.872635	84.163	1.31109	NA	NA	93.8479	0.872635	NA	exclude	off concordia
J17-567	IESNI001J	mineral	zircon	-June17567 Spot 27 core3					478.782	13445.7	1.3901	18.1895	1.55612	0.113379	1.96285	0.0149638	1.19635	0.609498	95.7481	1.13702	109.052	2.02959	410.287	34.806	95.7481	1.13702	NA	exclude	off concordia
J17-567	IESNI001J	mineral	zircon	-June17567 Spot 22					390.526	3138.2	2.5658	23.3927	1.65648	0.0882083	1.93711	0.014972	1.00422	0.518413	95.8	0.954933	85.833	1.59434	NA	NA	95.8	0.954933	NA	exclude	off concordia
J17-567	IESNI001J	mineral	zircon	-June17567 Spot 1					908.267	9318.86	1.75837	16.2602	3.3075	0.127519	3.52838	0.0150448	1.22879	0.348259	96.263	1.17408	121.866	4.0519	655.834	70.9644	96.263	1.17408	NA	exclude	off concordia
J17-567	IESNI001J	mineral	zircon	-June17567 Spot 23 rim1					809.365	4774.6	1.86011	17.77	3.32915	0.116791	3.49636	0.0150586	1.06829	0.305545	96.3506	1.02165	112.159	3.71267	462.274	73.8081	96.3506	1.02165	NA	exclude	off concordia
J17-567	IESNI001J	mineral	zircon	-June17567 Spot 25					926.287	53968.6	2.12883	18.8923	0.920808	0.109862	1.41754	0.0150598	1.07775	0.760293	96.3582	1.03078	105.839	1.42478	324.896	20.9291	96.3582	1.03078	NA	exclude	off concordia
J17-567	IESNI001J	mineral	zircon	-June17567 Spot 33					599.404	7424.77	2.25746	21.5829	1.05998	0.0975104	1.67559	0.0152703	1.29771	0.774479	97.6949	1.25824	94.4756	1.51161	13.9105	25.4828	97.6949	1.25824	NA	exclude	off concordia
J17-567	IESNI001J	mineral	zircon	-June17567 Spot 4					738.26	11773.2	1.36192	18.3627	1.09878	0.116743	1.48469	0.0155544	0.998497	0.672528	99.4986	0.985862	112.115	1.57595	389.048	24.6671	99.4986	0.985862	NA	exclude	off concordia
J17-567	IESNI001J	mineral	zircon	-June17567 Spot 11					1030.37	14441	1.55295	19.653	1.09633	0.112997	1.4894	0.0161132	1.00815	0.676884	103.044	1.03058	108.703	1.53537	234.546	25.3153	103.044	1.03058	NA	exclude	off concordia
J17-567	IESNI001J	mineral	zircon	-June17567 Spot 6					823.057	610.536	2.13276	8.19683	19.1837	0.276505	19.5495	0.0164451	3.7637	0.192522	105.15	3.92542	247.882	43.0235	1984.87	344.744	105.15	3.92542	NA	exclude	off concordia
J17-567	IESNI001J	mineral	zircon	-June17567 Spot 3					709.067	1759.77	1.6707	14.305	3.44865	0.159691	3.70394	0.0165751	1.35128	0.364823	105.974	1.4203	150.432	5.17886	924.667	70.8726	105.974	1.4203	NA	exclude	off concordia
J17-567	IESNI001J	mineral	zircon	-June17567 Spot 31					767.404	2764.2	1.326	15.9137	3.19656	0.156848	3.39494	0.0181109	1.1435	0.336825	115.706	1.31129	147.941	4.67378	701.874	68.0457	115.706	1.31129	NA	exclude	off concordia
J17-567	IESNI001J	mineral	zircon	-June17567 Spot 5					1552.92	8221.17	1.80042	20.5494	1.90928	0.0947433	2.17831	0.0141265	1.04866	0.48141	90.428	0.941661	91.9124	1.91419	130.633	44.8887	90.428	0.941661	NA		isolated young age
J17-567	IESNI001J	mineral	zircon	-June17567 Spot 21					463.89	24030.9	2.63756	20.8574	1.20255	0.0978354	1.78721	0.0148062	1.32211	0.739764	94.7472	1.2435	94.7763	1.6172	95.4987	28.4709	94.7472	1.2435	NA
J17-567	IESNI001J	mineral	zircon	-June17567 Spot 10					819.079	11286.1	1.83574	21.061	1.23607	0.0973275	1.58964	0.0148732	0.999548	0.628787	95.1725	0.944307	94.3064	1.43162	72.4616	29.3876	95.1725	0.944307	NA
J17-567	IESNI001J	mineral	zircon	-June17567 Spot 2					657.436	15376.4	2.39547	21.1014	1.18864	0.0975448	1.62237	0.0149349	1.10418	0.680597	95.5649	1.04743	94.5075	1.46407	67.9208	28.2677	95.5649	1.04743	NA
J17-567	IESNI001J	mineral	zircon	-June17567 Spot 30					665.346	24736.5	2.28117	21.1484	0.935308	0.0979879	1.39368	0.0150362	1.03322	0.741362	96.2079	0.986661	94.9173	1.2629	62.6186	22.2805	96.2079	0.986661	NA
J17-567	IESNI001J	mineral	zircon	-June17567 Spot 32					631.589	49436.6	2.31898	20.9704	1.14221	0.0989547	1.8527	0.0150567	1.45871	0.787346	96.3386	1.39486	95.811	1.69392	82.6767	27.1072	96.3386	1.39486	NA
J17-567	IESNI001J	mineral	zircon	-June17567 Spot 26					586.111	14727.4	2.16457	20.2007	1.15753	0.102869	1.76547	0.0150778	1.33304	0.755064	96.472	1.27644	99.4208	1.67205	170.697	27.0275	96.472	1.27644	NA
J17-567	IESNI001J	mineral	zircon	-June17567 Spot 19 rim2					728.114	16914.8	1.5752	20.7833	1.03827	0.100199	1.22631	0.0151101	0.652562	0.532134	96.6771	0.626171	96.96	1.13403	103.948	24.5655	96.6771	0.626171	NA
J17-567	IESNI001J	mineral	zircon	-June17567 Spot 17 core1					464.636	30401.8	1.95911	20.7158	1.26419	0.100555	1.66763	0.0151145	1.08757	0.652165	96.7056	1.04389	97.2888	1.54712	111.589	29.8415	96.7056	1.04389	NA
J17-567	IESNI001J	mineral	zircon	-June17567 Spot 20					714.389	90338.7	2.14282	21.2126	0.947187	0.0982416	1.48094	0.0151209	1.13842	0.768719	96.7459	1.09315	95.1519	1.34513	55.3561	22.5769	96.7459	1.09315	NA
J17-567	IESNI001J	mineral	zircon	-June17567 Spot 24 rim3					639.815	6250.85	1.48205	22.1309	2.8952	0.0946023	3.25828	0.0151911	1.49471	0.458744	97.1916	1.44184	91.7816	2.85933	NA	NA	97.1916	1.44184	NA
J17-567	IESNI001J	mineral	zircon	-June17567 Spot 8					1381.03	14601.2	1.97023	21.0806	1.16949	0.0993568	1.63961	0.0151974	1.14918	0.700886	97.2316	1.10898	96.1825	1.50463	70.2467	27.8196	97.2316	1.10898	NA
J17-567	IESNI001J	mineral	zircon	-June17567 Spot 9					626.516	128431	2.25184	21.1064	1.00263	0.0997314	1.451	0.0152733	1.04888	0.722865	97.7137	1.01717	96.5284	1.33612	67.3649	23.8665	97.7137	1.01717	NA
J17-567	IESNI001J	mineral	zircon	-June17567 Spot 18 core2					573.703	31849.4	1.74359	21.0355	1.07596	0.102445	1.62197	0.0156361	1.21372	0.748298	100.017	1.20456	99.0305	1.53041	75.3192	25.5558	100.017	1.20456	NA		isolated older age
J17-568A	IESNI001I	mineral	zircon	-June17568A Spot 62					371.431	4665.21	2.81894	23.1604	1.34361	0.0870798	1.83456	0.0146336	1.24913	0.680887	93.6509	1.16136	84.7794	1.49217	NA	NA	93.6509	1.16136	NA	exclude	off concordia
J17-568A	IESNI001I	mineral	zircon	-June17568A Spot 61					563.634	5126.75	1.96409	17.1467	4.24363	0.117748	4.46753	0.0146494	1.3966	0.312611	93.7511	1.29985	113.028	4.77869	540.842	92.8582	93.7511	1.29985	NA	exclude	off concordia
J17-568A	IESNI001I	mineral	zircon	-June17568A Spot 41 rim1					581.636	8606.71	2.47181	19.8166	1.16024	0.102628	1.71681	0.0147565	1.26542	0.737075	94.4312	1.18624	99.1994	1.62252	215.383	26.8693	94.4312	1.18624	NA	exclude	off concordia
J17-568A	IESNI001I	mineral	zircon	-June17568A Spot 67					390.136	3267.99	2.49347	23.2447	1.65218	0.0884211	2.25755	0.0149131	1.53845	0.681468	95.4264	1.45728	86.0315	1.8622	NA	NA	95.4264	1.45728	NA	exclude	off concordia
J17-568A	IESNI001I	mineral	zircon	-June17568A Spot 66					483.322	2017.35	2.53651	22.6843	1.33668	0.0906258	1.84396	0.0149164	1.27023	0.68886	95.4474	1.20347	88.0862	1.55582	NA	NA	95.4474	1.20347	NA	exclude	off concordia
J17-568A	IESNI001I	mineral	zircon	-June17568A Spot 38 rim3					458.518	3409.9	2.38261	23.1035	1.35916	0.0893566	1.8994	0.0149793	1.3268	0.698539	95.8468	1.26229	86.9039	1.58199	NA	NA	95.8468	1.26229	NA	exclude	off concordia
J17-568A	IESNI001I	mineral	zircon	-June17568A Spot 69 core3					363.496	5654.87	2.52597	22.6847	1.14382	0.0912295	1.70646	0.015016	1.26636	0.742098	96.08	1.20769	88.6481	1.44859	NA	NA	96.08	1.20769	NA	exclude	off concordia
J17-568A	IESNI001I	mineral	zircon	-June17568A Spot 56					469.522	1452.64	2.67604	14.0402	2.01807	0.148042	2.3969	0.0150816	1.29326	0.539557	96.4963	1.23866	140.182	3.13841	962.985	41.201	96.4963	1.23866	NA	exclude	off concordia
J17-568A	IESNI001I	mineral	zircon	-June17568A Spot 70 rim4					456.69	2628.77	2.42042	13.1347	5.24643	0.158542	5.42126	0.0151095	1.36568	0.251911	96.6737	1.3104	149.426	7.53305	1097.75	105.075	96.6737	1.3104	NA	exclude	off concordia
J17-568A	IESNI001I	mineral	zircon	-June17568A Spot 40 core1					381.379	6090.55	1.34738	22.1753	1.14237	0.0947887	1.98638	0.0152515	1.62503	0.818083	97.5756	1.57369	91.9545	1.7463	NA	NA	97.5756	1.57369	NA	exclude	off concordia
J17-568A	IESNI001I	mineral	zircon	-June17568A Spot 64					571.572	58799	2.08108	18.5849	1.83426	0.114917	2.38482	0.0154964	1.5241	0.639084	99.1304	1.49929	110.453	2.49591	361.979	41.3553	99.1304	1.49929	NA	exclude	off concordia
J17-568A	IESNI001I	mineral	zircon	-June17568A Spot 59 core4					669.094	849.053	2.06673	10.8948	2.75022	0.19874	3.15863	0.0157105	1.55347	0.491817	100.489	1.54896	184.059	5.31731	1462.14	52.2745	100.489	1.54896	NA	exclude	off concordia
J17-568A	IESNI001I	mineral	zircon	-June17568A Spot 57					129.556	876.679	2.80462	7.51957	5.03715	0.316176	5.32595	0.0172508	1.72998	0.324822	110.258	1.89122	278.957	12.9917	2136.99	88.1559	110.258	1.89122	NA	exclude	off concordia
J17-568A	IESNI001I	mineral	zircon	-June17568A Spot 39 core2					507.221	224.722	2.52388	4.03358	22.2628	0.797203	22.3892	0.0233318	2.37645	0.106142	148.678	3.49283	595.25	101.175	3170.82	357.996	148.678	3.49283	NA	exclude	off concordia
J17-568A	IESNI001I	mineral	zircon	-June17568A Spot 37					1061.7	11675.6	1.72034	20.3256	1.24399	0.0992428	1.74217	0.0146363	1.21969	0.700097	93.6677	1.13419	96.0772	1.59708	156.297	29.0994	93.6677	1.13419	NA
J17-568A	IESNI001I	mineral	zircon	-June17568A Spot 36 rim2					1226.22	15081.9	2.23028	20.3669	1.78845	0.100068	2.32763	0.014788	1.48973	0.640022	94.6318	1.39946	96.8395	2.14991	151.527	41.9088	94.6318	1.39946	NA
J17-568A	IESNI001I	mineral	zircon	-June17568A Spot 65					450.227	11379.2	2.16912	21.1388	1.70265	0.096531	2.07751	0.0148059	1.1904	0.572994	94.7454	1.1196	93.5692	1.85704	63.6834	40.5474	94.7454	1.1196	NA
J17-568A	IESNI001I	mineral	zircon	-June17568A Spot 55					503.948	16371.4	2.1423	20.9968	1.23848	0.0976744	1.64013	0.0148806	1.07527	0.6556	95.22	1.01635	94.6273	1.48189	79.6883	29.3863	95.22	1.01635	NA
J17-568A	IESNI001I	mineral	zircon	-June17568A Spot 58					445.8	9216.97	2.27677	21.3193	1.2434	0.0969478	1.82268	0.0149968	1.33272	0.731185	95.958	1.26938	93.955	1.63566	43.4082	29.7411	95.958	1.26938	NA
J17-568A	IESNI001I	mineral	zircon	-June17568A Spot 60					625.943	5854.1	1.6132	20.6919	1.44425	0.100472	1.976	0.0150846	1.3486	0.682489	96.5155	1.29191	97.2123	1.83183	114.346	34.0751	96.5155	1.29191	NA
J17-568A	IESNI001I	mineral	zircon	-June17568A Spot 63					332.916	3545.84	2.26582	19.5838	2.97627	0.109416	3.27622	0.0155477	1.36947	0.418002	99.4556	1.35156	105.431	3.28089	242.637	68.6177	99.4556	1.35156	NA
J17-568A	IESNI001I	mineral	zircon	-June17568A Spot 68					419.179	3071.29	2.53158	20.8059	1.74376	0.103527	2.245	0.0156289	1.41396	0.629829	99.9712	1.40265	100.027	2.13854	101.33	41.2414	99.9712	1.40265	NA
BL18-1	IESNI001L	mineral	zircon	Run1-BL-18-1 Spot 14					1266.97	433281	1.46602	20.4517	0.614273	0.10049	1.13528	0.0149121	0.954735	0.840972	95.4199	0.904298	97.2283	1.05261	141.794	14.4138	95.4199	0.904298	NA	exclude	off concordia
BL18-1	IESNI001L	mineral	zircon	Run1-BL-18-1 Spot 26					177.254	5339.64	2.12094	22.1224	2.04325	0.093759	2.25962	0.0150499	0.964906	0.427021	96.295	0.922251	90.9991	1.96679	NA	NA	96.295	0.922251	NA	exclude	off concordia
BL18-1	IESNI001L	mineral	zircon	Run1-BL-18-1 Spot 20					497.957	5909.18	2.80851	21.668	1.02343	0.0966589	1.45752	0.0151967	1.03776	0.712003	97.2271	1.00141	93.6875	1.30441	4.47088	24.6361	97.2271	1.00141	NA	exclude	off concordia
BL18-1	IESNI001L	mineral	zircon	Run1-BL-18-1 Spot 25					691.767	23207.3	1.67025	19.712	0.845512	0.107896	1.16015	0.0154321	0.794388	0.68473	98.7222	0.778262	104.039	1.14723	227.61	19.5272	98.7222	0.778262	NA	exclude	off concordia
BL18-1	IESNI001L	mineral	zircon	Run1-BL-18-1 Spot 24					3256.33	20778.2	0.816216	19.1408	0.981361	0.113904	1.49171	0.0158193	1.12344	0.753125	101.18	1.12782	109.531	1.54884	295.122	22.4015	101.18	1.12782	NA	exclude	off concordia
BL18-1	IESNI001L	mineral	zircon	Run1-BL-18-1 Spot 27					571.685	16792.3	0.889928	21.345	0.827066	0.102228	1.38291	0.0158326	1.10833	0.801449	101.264	1.11357	98.8305	1.30233	40.5332	19.7796	101.264	1.11357	NA	exclude	off concordia
BL18-1	IESNI001L	mineral	zircon	Run1-BL-18-1 Spot 28					414.695	39343.2	2.83967	19.6648	1.26804	0.112815	1.68059	0.0160969	1.10294	0.656281	102.941	1.12636	108.537	1.72996	233.16	29.2789	102.941	1.12636	NA	exclude	off concordia
BL18-1	IESNI001L	mineral	zircon	Run1-BL-18-1 Spot 15					398.183	7749.89	1.32232	12.2773	3.98647	0.182527	4.12116	0.0162599	1.04499	0.253568	103.975	1.07782	170.232	6.45908	1231.51	78.2614	103.975	1.07782	NA	exclude	off concordia
BL18-1	IESNI001L	mineral	zircon	Run1-BL-18-1 Spot 9					322.503	1570.93	2.98799	10.7986	11.1217	0.215129	11.5566	0.0168559	3.14036	0.271738	107.754	3.35575	197.847	20.7776	1478.98	211.527	107.754	3.35575	NA	exclude	off concordia
BL18-1	IESNI001L	mineral	zircon	Run1-BL-18-1 Spot 6					290.768	7607.93	1.4894	21.2683	1.81613	0.0962684	2.35192	0.0148561	1.49438	0.63539	95.064	1.4102	93.3259	2.0971	49.0955	43.3887	95.064	1.4102	NA
BL18-1	IESNI001L	mineral	zircon	Run1-BL-18-1 Spot 13					396.517	14096.5	2.37826	20.797	1.20021	0.0990819	1.6701	0.0149514	1.16135	0.695378	95.6695	1.10286	95.9285	1.52875	102.359	28.3897	95.6695	1.10286	NA
BL18-1	IESNI001L	mineral	zircon	Run1-BL-18-1 Spot 3					268.699	19265	1.07618	21.1701	1.3645	0.0974218	2.09396	0.0149647	1.58834	0.758534	95.7538	1.50966	94.3937	1.88748	60.1624	32.5194	95.7538	1.50966	NA
BL18-1	IESNI001L	mineral	zircon	Run1-BL-18-1 Spot 12					443.592	28408.5	2.27234	20.8806	0.934334	0.0988366	1.52894	0.0149744	1.21023	0.791553	95.8156	1.15102	95.7019	1.39638	92.8736	22.1414	95.8156	1.15102	NA
BL18-1	IESNI001L	mineral	zircon	Run1-BL-18-1 Spot 29					692.484	25737.6	1.18187	21.1819	0.811543	0.0976222	1.24523	0.0150038	0.944456	0.758459	96.0024	0.899982	94.5791	1.12454	58.8509	19.3222	96.0024	0.899982	NA
BL18-1	IESNI001L	mineral	zircon	Run1-BL-18-1 Spot 21					571.99	193169	2.63502	20.4532	0.842716	0.101363	1.54645	0.0150427	1.29666	0.838477	96.2496	1.23876	98.0334	1.44515	141.63	19.7701	96.2496	1.23876	NA
BL18-1	IESNI001L	mineral	zircon	Run1-BL-18-1 Spot 18					442.365	41910.4	1.86627	20.6101	1.08226	0.100705	1.5422	0.0150598	1.09868	0.712408	96.3579	1.05079	97.4271	1.43269	123.653	25.4851	96.3579	1.05079	NA
BL18-1	IESNI001L	mineral	zircon	Run1-BL-18-1 Spot 2					480.721	18817.8	2.39866	21.2683	1.03292	0.0976941	1.53438	0.0150761	1.13463	0.739475	96.4616	1.08634	94.6456	1.38659	49.0905	24.6828	96.4616	1.08634	NA
BL18-1	IESNI001L	mineral	zircon	Run1-BL-18-1 Spot 5					634.446	52199.7	3.08023	21.0298	0.901029	0.0989205	1.42233	0.0150942	1.10053	0.773752	96.5763	1.05493	95.7794	1.30002	75.959	21.4078	96.5763	1.05493	NA
BL18-1	IESNI001L	mineral	zircon	Run1-BL-18-1 Spot 10					533.148	42755.6	2.26169	20.8571	1.03484	0.0999814	1.40534	0.0151308	0.950829	0.676583	96.8087	0.913608	96.7592	1.29702	95.5167	24.4799	96.8087	0.913608	NA
BL18-1	IESNI001L	mineral	zircon	Run1-BL-18-1 Spot 22					508.435	13814	1.33991	21.0398	1.53869	0.09923	1.95389	0.0151486	1.20421	0.616315	96.922	1.15841	96.0653	1.79095	74.8713	36.5794	96.922	1.15841	NA
BL18-1	IESNI001L	mineral	zircon	Run1-BL-18-1 Spot 33					577.48	8067.05	2.32447	21.4004	1.06317	0.0978143	1.45518	0.0151884	0.993598	0.682798	97.1747	0.958284	94.7568	1.3165	34.2957	25.4379	97.1747	0.958284	NA
BL18-1	IESNI001L	mineral	zircon	Run1-BL-18-1 Spot 11					551.043	12760.9	2.06807	20.6585	1.44121	0.101678	1.84445	0.0152409	1.15105	0.624061	97.5083	1.11392	98.3237	1.72849	118.166	34.0007	97.5083	1.11392	NA
BL18-1	IESNI001L	mineral	zircon	Run1-BL-18-1 Spot 23					487.356	7206.63	2.20493	20.6584	1.22586	0.102105	1.68643	0.015305	1.15815	0.686745	97.9149	1.12543	98.7178	1.58644	118.172	28.8966	97.9149	1.12543	NA
BL18-1	IESNI001L	mineral	zircon	Run1-BL-18-1 Spot 8					430.603	102439	2.29933	20.8559	1.06935	0.101241	1.61883	0.0153205	1.21537	0.750767	98.0131	1.18221	97.921	1.51114	95.6754	25.3353	98.0131	1.18221	NA
BL18-1	IESNI001L	mineral	zircon	Run1-BL-18-1 Spot 7					372.22	4833.93	2.79452	21.0549	1.0384	0.100291	1.45619	0.0153215	1.02088	0.701064	98.0199	0.993097	97.0449	1.34773	73.1383	24.6996	98.0199	0.993097	NA
BL18-1	IESNI001L	mineral	zircon	Run1-BL-18-1 Spot 1					494.235	469782	1.14615	21.0127	1.0737	0.100495	1.47806	0.0153219	1.01579	0.687246	98.0224	0.988169	97.2328	1.37049	77.8899	25.4936	98.0224	0.988169	NA
BL18-1	IESNI001L	mineral	zircon	Run1-BL-18-1 Spot 32					552.188	15307	1.38946	20.9254	1.10683	0.100957	1.54196	0.0153284	1.07357	0.696237	98.0638	1.04481	97.6594	1.43572	87.8208	26.2258	98.0638	1.04481	NA
BL18-1	IESNI001L	mineral	zircon	Run1-BL-18-1 Spot 16					674.171	42628.8	2.4749	21.0034	0.891717	0.100828	1.63291	0.0153659	1.36793	0.837726	98.3016	1.3345	97.5404	1.51864	78.9484	21.1919	98.3016	1.3345	NA
BL18-1	IESNI001L	mineral	zircon	Run1-BL-18-1 Spot 31					570.34	10586.7	1.96563	21.329	0.941455	0.099666	1.29822	0.0154243	0.893892	0.688551	98.6722	0.875307	96.468	1.19472	42.3206	22.5317	98.6722	0.875307	NA
BL18-1	IESNI001L	mineral	zircon	Run1-BL-18-1 Spot 35					453.292	21522.4	2.41613	20.5364	1.05674	0.103829	1.53673	0.0154714	1.11573	0.726041	98.9711	1.09582	100.304	1.46772	132.12	24.8432	98.9711	1.09582	NA
BL18-1	IESNI001L	mineral	zircon	Run1-BL-18-1 Spot 30					506.644	61054.6	2.13368	20.9749	0.99169	0.101938	1.3287	0.015514	0.884305	0.665541	99.2417	0.870879	98.5637	1.24806	82.1693	23.5141	99.2417	0.870879	NA
BL18-1	IESNI001L	mineral	zircon	Run1-BL-18-1 Spot 34					654.666	22719.9	1.22397	20.7692	1.11318	0.103452	1.49317	0.01559	0.995177	0.666487	99.7243	0.984796	99.9576	1.42142	105.503	26.3271	99.7243	0.984796	NA
BL18-1	IESNI001L	mineral	zircon	Run1-BL-18-1 Spot 17					634.146	76916.3	1.734	21.1605	0.840364	0.101848	1.25671	0.0156374	0.934397	0.743529	100.025	0.927421	98.4807	1.17949	61.2427	20.0005	100.025	0.927421	NA
BL18-1	IESNI001L	mineral	zircon	Run1-BL-18-1 Spot 19					506.578	31750.1	1.89949	20.8217	0.981272	0.103671	1.41513	0.0156625	1.01966	0.720539	100.184	1.01364	100.159	1.34972	99.5434	23.2148	100.184	1.01364	NA
BL18-1	IESNI001L	mineral	zircon	Run1-BL-18-1 Spot 4					1026.98	29023.9	0.89812	21.238	0.912136	0.103588	1.76766	0.0159628	1.51415	0.856581	102.09	1.53362	100.083	1.68474	52.5297	21.7861	102.09	1.53362	NA		isolated old age
C-59	IESNI001M	mineral	zircon	C-59-50					1263.38	38971.1	2.30606	19.7535	3.62903	0.189546	a	0.0271554	4.39042	0.770776	172.72	7.48246	176.242	9.21622	223.732	83.957	172.72	7.48246	NA	inheritance
C-59	IESNI001M	mineral	zircon	C-59-58					183.219	684.384	2.59576	20.3563	34.405	0.0981078	35.7113	0.0144844	9.5704	0.267994	92.7027	8.80855	95.0282	32.4072	153.8	827.6	92.7027	8.80855	NA
C-59	IESNI001M	mineral	zircon	C-59-28					358.603	4011.95	1.72919	20.9838	23.6112	0.0959345	24.3686	0.0146001	6.02829	0.24738	93.4381	5.5921	93.0166	21.6629	82.1968	567.185	93.4381	5.5921	NA
C-59	IESNI001M	mineral	zircon	C-59-39					843.127	15620.9	0.883629	19.779	11.9247	0.103219	12.1985	0.0148068	2.57039	0.210712	94.7512	2.41766	99.7434	11.5892	220.757	276.703	94.7512	2.41766	NA
C-59	IESNI001M	mineral	zircon	C-59-56					541.892	13446.1	2.72633	20.2125	15.1318	0.101769	15.4343	0.0149188	3.04081	0.197016	95.4623	2.88144	98.4078	14.4767	170.35	355.049	95.4623	2.88144	NA
C-59	IESNI001M	mineral	zircon	C-59-57					312.678	6237.88	1.9645	25.8339	25.6928	0.0803574	26.0852	0.0150562	4.50748	0.172799	96.335	4.30999	78.4809	19.7032	-436.402	684.296	96.335	4.30999	NA
C-59	IESNI001M	mineral	zircon	C-59-42					191.467	3645.6	2.53749	24.806	49.7829	0.0836885	50.2883	0.0150564	7.11143	0.141413	96.3364	6.79996	81.6068	39.4527	-330.859	1354.81	96.3364	6.79996	NA
C-59	IESNI001M	mineral	zircon	C-59-29					521.149	18793.9	1.65881	20.5709	21.3997	0.100965	21.8122	0.0150633	4.2222	0.193571	96.3803	4.03911	97.6664	20.3134	129.203	508.488	96.3803	4.03911	NA
C-59	IESNI001M	mineral	zircon	C-59-57					165.218	3813.83	2.28906	19.6477	37.6421	0.105743	38.814	0.0150682	9.46564	0.243871	96.4114	9.05805	102.064	37.7064	236.126	897.295	96.4114	9.05805	NA
C-59	IESNI001M	mineral	zircon	C-59-41					318.369	6212.71	1.94857	24.5735	17.1007	0.085303	17.7669	0.015203	4.81962	0.27127	97.2673	4.65273	83.1184	14.1802	-306.694	440.267	97.2673	4.65273	NA
C-59	IESNI001M	mineral	zircon	C-59-24					1195.97	34433.4	2.71095	22.9665	4.64834	0.0914239	4.98972	0.0152283	1.81389	0.363526	97.4282	1.75396	88.8289	4.24399	-136.513	115.079	97.4282	1.75396	NA
C-59	IESNI001M	mineral	zircon	C-59-55					484.393	11049.4	2.36945	22.1213	23.7254	0.0952795	24.1585	0.0152866	4.55364	0.18849	97.7979	4.41975	92.4096	21.3421	-44.5571	583.748	97.7979	4.41975	NA
C-59	IESNI001M	mineral	zircon	C-59-34					582.696	8586	1.55527	22.6096	14.8282	0.0933053	14.9934	0.0153002	2.21912	0.148007	97.8844	2.15576	90.5777	12.9932	-97.9	365.875	97.8844	2.15576	NA
C-59	IESNI001M	mineral	zircon	C-59-6					108.352	3101.65	1.69613	15.3217	41.2326	0.137749	42.2691	0.0153072	9.30301	0.22009	97.9289	9.04149	131.037	52.0086	782.931	904.04	97.9289	9.04149	NA
C-59	IESNI001M	mineral	zircon	C-59-42					282.421	4914.21	1.79305	18.6957	30.3593	0.113101	30.8102	0.0153358	5.2516	0.17045	98.1104	5.11336	108.798	31.7977	349.548	700.901	98.1104	5.11336	NA
C-59	IESNI001M	mineral	zircon	C-59-18					561.801	15890.9	1.90734	21.5313	15.7024	0.0982683	16.465	0.0153455	4.95275	0.300805	98.1722	4.82539	95.1766	14.9599	20.7364	378.966	98.1722	4.82539	NA
C-59	IESNI001M	mineral	zircon	C-59-4					378.845	10507.9	1.86762	26.7041	30.5828	0.0792661	31.1094	0.015352	5.69974	0.183216	98.2134	5.55549	77.4547	23.2036	-524.247	834.207	98.2134	5.55549	NA
C-59	IESNI001M	mineral	zircon	C-59-23					162.934	3372.13	2.4077	18.3518	29.2274	0.115509	30.5669	0.0153742	8.94942	0.292782	98.3545	8.73536	110.992	32.1491	391.356	668.805	98.3545	8.73536	NA
C-59	IESNI001M	mineral	zircon	C-59-16					594.614	16875.1	2.29945	19.826	13.0308	0.107026	13.2362	0.0153894	2.32273	0.175483	98.451	2.26938	103.241	12.9941	215.283	302.877	98.451	2.26938	NA
C-59	IESNI001M	mineral	zircon	C-59-11					194.734	13421.6	2.57181	19.6254	32.8965	0.108205	33.8803	0.0154016	8.10529	0.239233	98.5282	7.92528	104.322	33.6019	238.746	777.419	98.5282	7.92528	NA
C-59	IESNI001M	mineral	zircon	C-59-52					191.347	5824.51	2.72745	22.2921	36.3271	0.0954262	36.8871	0.0154283	6.4029	0.173581	98.6977	6.27139	92.5456	32.6391	-63.2853	912.568	98.6977	6.27139	NA
C-59	IESNI001M	mineral	zircon	C-59-57					209.379	3061.12	1.86648	26.137	31.3924	0.0814999	32.5414	0.0154494	8.57103	0.263389	98.8317	8.4063	79.5541	24.9048	-467.145	847.244	98.8317	8.4063	NA
C-59	IESNI001M	mineral	zircon	C-59-45					339.146	8057.24	1.80777	20.0182	8.96304	0.106489	9.98138	0.0154606	4.39225	0.440045	98.9029	4.31091	102.748	9.75416	192.901	208.753	98.9029	4.31091	NA
C-59	IESNI001M	mineral	zircon	C-59-51					1437.03	37408.7	3.63037	20.5963	5.50104	0.103842	5.62871	0.0155117	1.19205	0.21178	99.2275	1.17378	100.316	5.37661	126.293	129.553	99.2275	1.17378	NA
C-59	IESNI001M	mineral	zircon	C-59-60					599.209	18137	1.7055	22.9773	11.1874	0.0931187	11.4809	0.015518	2.57969	0.224693	99.267	2.54116	90.4044	9.93095	-137.682	277.62	99.267	2.54116	NA
C-59	IESNI001M	mineral	zircon	C-59-32					371.074	5384.12	2.60132	23.0232	20.4543	0.0933551	21.0459	0.0155884	4.95517	0.235446	99.7143	4.903	90.624	18.2482	-142.621	511.208	99.7143	4.903	NA
C-59	IESNI001M	mineral	zircon	C-59-1					959.324	47452.3	2.14056	20.0052	7.96298	0.107563	9.75616	0.0156065	5.63681	0.57777	99.8289	5.58382	103.734	9.62094	194.414	185.356	99.8289	5.58382	NA
C-59	IESNI001M	mineral	zircon	C-59-8					444.686	9810.03	1.86317	20.5962	10.7668	0.104541	11.5519	0.0156161	4.18609	0.362372	99.89	4.14926	100.959	11.1021	126.306	254.052	99.89	4.14926	NA
C-59	IESNI001M	mineral	zircon	C-59-48					1186.33	17242.1	2.68088	20.9529	6.72759	0.102845	8.55738	0.0156287	5.28851	0.618005	99.9701	5.24614	99.3987	8.10302	85.7377	159.718	99.9701	5.24614	NA
C-59	IESNI001M	mineral	zircon	C-59-40					428.734	21405.8	2.04386	18.4457	13.7062	0.116828	14.5088	0.0156294	4.75866	0.327985	99.9743	4.72074	112.193	15.4119	379.897	309.492	99.9743	4.72074	NA
C-59	IESNI001M	mineral	zircon	C-59-35					272.427	7004.03	2.17433	25.0767	25.973	0.0860194	27.0245	0.0156447	7.46523	0.276239	100.071	7.41286	83.7885	21.7377	-358.854	681.191	100.071	7.41286	NA
C-59	IESNI001M	mineral	zircon	C-59-46					1027.62	53445	1.50611	21.0374	9.28056	0.102558	9.6039	0.015648	2.47106	0.257298	100.093	2.45425	99.135	9.07106	76.1404	220.9	100.093	2.45425	NA
C-59	IESNI001M	mineral	zircon	C-59-57					554.983	14200.2	1.80472	22.152	12.8172	0.0975749	12.9322	0.0156765	1.72021	0.133018	100.273	1.71157	94.5353	11.6741	-47.926	312.844	100.273	1.71157	NA
C-59	IESNI001M	mineral	zircon	C-59-27					325.447	7344.31	1.32116	23.5793	21.8205	0.0917293	22.4508	0.0156869	5.28286	0.235308	100.339	5.25975	89.113	19.1561	-202.099	552.399	100.339	5.25975	NA
C-59	IESNI001M	mineral	zircon	C-59-53					1027.34	29285.5	2.02615	20.4424	8.74892	0.105807	9.11213	0.0156872	2.54701	0.279519	100.341	2.53591	102.123	8.85312	143.912	205.59	100.341	2.53591	NA
C-59	IESNI001M	mineral	zircon	C-59-25					1089.15	28425.7	1.92638	21.0511	5.6908	0.102761	6.37494	0.0156892	2.87308	0.450684	100.354	2.86092	99.3214	6.03193	74.6161	135.325	100.354	2.86092	NA
C-59	IESNI001M	mineral	zircon	C-59-20					604.093	18780.7	2.47523	20.5954	8.47804	0.10519	8.64362	0.0157124	1.68373	0.194795	100.501	1.67905	101.556	8.35357	126.397	199.872	100.501	1.67905	NA
C-59	IESNI001M	mineral	zircon	C-59-33					997.228	13571.3	2.35084	20.4536	6.42736	0.106172	6.63219	0.0157499	1.63555	0.246608	100.739	1.63484	102.458	6.46369	142.638	150.963	100.739	1.63484	NA
C-59	IESNI001M	mineral	zircon	C-59-59					783.817	16806	2.48506	20.1044	7.23861	0.108503	7.49483	0.0158209	1.94293	0.259235	101.19	1.95069	104.595	7.4491	182.858	168.827	101.19	1.95069	NA
C-59	IESNI001M	mineral	zircon	C-59-44					186.304	2150.98	2.40732	23.4174	20.178	0.0934385	21.8307	0.0158695	8.33231	0.381678	101.498	8.3909	90.7015	18.9444	-184.853	508.356	101.498	8.3909	NA
C-59	IESNI001M	mineral	zircon	C-59-26					886.414	26590.1	2.85152	22.7678	12.52	0.0963388	13.3287	0.0159082	4.57197	0.343018	101.744	4.61519	93.3912	11.893	-115.064	309.537	101.744	4.61519	NA
C-59	IESNI001M	mineral	zircon	C-59-3					367.385	11321.2	2.37584	21.1635	31.0769	0.103732	31.4624	0.0159221	4.91002	0.15606	101.832	4.9607	100.216	30.033	61.9459	756.322	101.832	4.9607	NA
C-59	IESNI001M	mineral	zircon	C-59-47					263.64	8348.32	2.02694	23.9727	19.8813	0.0916688	20.0276	0.0159381	2.41582	0.120625	101.934	2.44317	89.0568	17.0777	-243.747	506.595	101.934	2.44317	NA
C-59	IESNI001M	mineral	zircon	C-59-30					539.56	16472.6	2.34219	20.0065	7.0238	0.109844	9.53378	0.0159385	6.44664	0.67619	101.936	6.51975	105.823	9.58125	194.259	163.452	101.936	6.51975	NA
C-59	IESNI001M	mineral	zircon	C-59-54					792.256	16423.1	2.25993	20.8644	8.56767	0.105541	8.97214	0.0159708	2.66354	0.296868	102.141	2.69912	101.878	8.69727	95.7415	203.13	102.141	2.69912	NA
C-59	IESNI001M	mineral	zircon	C-59-22					474.585	17344.3	2.88056	21.3629	11.3715	0.103375	12.402	0.0160168	4.94967	0.399102	102.433	5.03002	99.8873	11.7987	39.576	272.802	102.433	5.03002	NA
C-59	IESNI001M	mineral	zircon	C-59-49					941.504	17065.9	3.69458	21.2457	6.96417	0.104	7.14403	0.0160251	1.59298	0.222981	102.486	1.61967	100.462	6.83349	52.6713	166.372	102.486	1.61967	NA
C-59	IESNI001M	mineral	zircon	C-59-57					536.881	12339.5	1.58384	20.0564	15.8769	0.110664	16.2726	0.0160975	3.56674	0.219187	102.945	3.64261	106.573	16.4645	188.421	371.503	102.945	3.64261	NA
C-59	IESNI001M	mineral	zircon	C-59-13					175.167	6838.51	2.16688	28.3175	41.882	0.0783992	42.7204	0.0161015	8.42217	0.197146	102.97	8.60342	76.6388	31.5455	-683.856	1202.69	102.97	8.60342	NA
C-59	IESNI001M	mineral	zircon	C-59-7					413.778	12461.3	2.44915	25.2889	26.3299	0.0878624	26.861	0.0161151	5.31514	0.197875	103.056	5.43404	85.5101	22.0318	-380.696	693.873	103.056	5.43404	NA
C-59	IESNI001M	mineral	zircon	C-59-58					660.358	16201	4.1088	20.2702	10.3232	0.109865	10.5855	0.0161516	2.34199	0.221244	103.288	2.39972	105.842	10.6402	163.69	241.861	103.288	2.39972	NA
C-59	IESNI001M	mineral	zircon	C-59-31					684.062	14975.3	1.95849	20.2797	7.97638	0.109901	9.22924	0.0161646	4.64287	0.503061	103.37	4.76106	105.875	9.27955	162.594	186.747	103.37	4.76106	NA
C-59	IESNI001M	mineral	zircon	C-59-43					373.156	8885.38	1.9072	21.4695	11.7537	0.104913	13.9969	0.0163361	7.60018	0.542991	104.458	7.87502	101.301	13.4954	27.6574	282.659	104.458	7.87502	NA
C-59	IESNI001M	mineral	zircon	C-59-15					215.214	2659.66	2.63702	27.3688	32.5179	0.0823354	33.391	0.0163434	7.58581	0.227181	104.504	7.8636	80.3383	25.7975	-590.488	901.614	104.504	7.8636	NA
C-59	IESNI001M	mineral	zircon	C-59-12					988.728	39182.7	3.16148	19.2174	8.33086	0.117534	9.22967	0.0163817	3.97287	0.430446	104.747	4.12786	112.834	9.85675	286.977	190.74	104.747	4.12786	NA
C-59	IESNI001M	mineral	zircon	C-59-10					204.39	3994.24	2.20944	20.2561	45.9713	0.11177	46.6245	0.0164202	7.77736	0.166808	104.992	8.09948	107.583	47.6291	165.314	1129.69	104.992	8.09948	NA
C-59	IESNI001M	mineral	zircon	C-59-35					633.412	19582.3	1.98629	20.5742	7.70308	0.110578	9.14397	0.0165003	4.92694	0.538818	105.5	5.1556	106.494	9.24479	128.821	181.456	105.5	5.1556	NA
C-59	IESNI001M	mineral	zircon	C-59-38					4353.08	131225	2.60627	20.7053	1.84997	0.110981	2.52733	0.016666	1.72191	0.681317	106.55	1.81962	106.863	2.56351	113.853	43.6742	106.55	1.81962	NA
C-59	IESNI001M	mineral	zircon	C-59-21					658.882	38062.2	2.42522	19.927	12.1905	0.118673	12.708	0.0171511	3.58957	0.282464	109.626	3.90182	113.869	13.6894	203.473	283.813	109.626	3.90182	NA
DL16-88	IESNI001P	mineral	zircon	-DL16-88 Spot 56					1250.31	87794.5	1.94186	19.6822	1.28628	0.113279	2.70221	0.0161774	2.37643	0.87944	103.452	2.43885	108.96	2.79187	232.077	29.7079	103.452	2.43885	NA	exclude	off concordia
DL16-88	IESNI001P	mineral	zircon	-DL16-88 Spot 44					1101.03	32215.4	1.82309	17.3975	1.60859	0.128718	2.96788	0.0162486	2.49415	0.840379	103.903	2.57072	122.945	3.43663	509.984	35.3707	103.903	2.57072	NA	exclude	off concordia
DL16-88	IESNI001P	mineral	zircon	-DL16-88 Spot 46					1659.51	71683.2	1.66909	18.3856	1.96283	0.126508	3.2214	0.0168765	2.55436	0.792933	107.885	2.73284	120.955	3.67333	387.229	44.0788	107.885	2.73284	NA	exclude	off concordia
DL16-88	IESNI001P	mineral	zircon	-DL16-88 Spot 40					1729.74	47349.1	3.11867	17.823	1.90946	0.137341	3.24246	0.017761	2.6206	0.808213	113.49	2.94809	130.673	3.97572	456.62	42.3678	113.49	2.94809	NA	exclude	off concordia
DL16-88	IESNI001P	mineral	zircon	-DL16-88 Spot 55					1346.37	7556.92	1.86129	10.1156	6.86586	0.243237	7.72562	0.0178529	3.54191	0.458462	114.072	4.00478	221.068	15.3487	1602.66	128.221	114.072	4.00478	NA	exclude	off concordia
DL16-88	IESNI001P	mineral	zircon	-DL16-88 Spot 60					3927.52	422632	4.41283	20.6969	1.22241	0.124639	2.53241	0.0187176	2.21784	0.875783	119.546	2.62691	119.269	2.84975	114.765	28.8282	119.546	2.62691	NA	exclude	inheritance
DL16-88	IESNI001P	mineral	zircon	-DL16-88 Spot 57					4127.08	816586	1.98066	20.8517	1.06396	0.127129	2.08734	0.0192342	1.79582	0.860341	122.814	2.18465	121.515	2.39053	97.1578	25.1801	122.814	2.18465	NA	exclude	inheritance
DL16-88	IESNI001P	mineral	zircon	-DL16-88 Spot 41					351.308	12808.6	2.51625	20.397	1.50701	0.170518	3.06841	0.0252363	2.67283	0.871082	160.665	4.24123	159.869	4.53877	149.105	35.3268	160.665	4.24123	NA	exclude	inheritance
DL16-88	IESNI001P	mineral	zircon	-DL16-88 Spot 36					433.573	130796	1.37836	20.1092	1.58746	0.179503	3.22152	0.0261912	2.80324	0.870161	166.666	4.61218	167.633	4.97814	182.293	36.9949	166.666	4.61218	NA	exclude	inheritance
DL16-88	IESNI001P	mineral	zircon	-DL16-88 Spot 38					816.642	78664.3	1.48084	20.1699	1.0684	0.182028	2.84772	0.0266398	2.63971	0.926954	169.483	4.41557	169.804	4.45288	175.269	24.924	169.483	4.41557	NA	exclude	inheritance
DL16-88	IESNI001P	mineral	zircon	-DL16-88 Spot 51					1681.04	211116	2.60176	19.8904	1.07742	0.239052	2.79225	0.0345002	2.57601	0.922557	218.652	5.53806	217.644	5.47005	207.767	24.9855	218.652	5.53806	NA	exclude	inheritance
DL16-88	IESNI001P	mineral	zircon	-DL16-88 Spot 58					506.37	13055.1	3.44633	20.7497	2.01303	0.10248	3.30556	0.015429	2.62192	0.793184	98.7025	2.56819	99.063	3.11993	108.796	47.5244	98.7025	2.56819	NA
DL16-88	IESNI001P	mineral	zircon	-DL16-88 Spot 61					1136.16	115187	1.52839	20.822	1.32555	0.103329	2.69209	0.0156111	2.34313	0.870377	99.858	2.32177	99.8447	2.55999	100.58	31.3506	99.858	2.32177	NA
DL16-88	IESNI001P	mineral	zircon	-DL16-88 Spot 62					1515.49	49262.3	1.86251	20.679	1.58848	0.104321	3.05843	0.0156526	2.61356	0.854544	100.122	2.59653	100.757	2.93362	116.809	37.4606	100.122	2.59653	NA
DL16-88	IESNI001P	mineral	zircon	-DL16-88 Spot 39					652.391	30367.2	1.92885	20.6318	1.67516	0.104961	3.23116	0.0157128	2.76301	0.855115	100.504	2.7554	101.346	3.11653	122.208	39.4865	100.504	2.7554	NA
DL16-88	IESNI001P	mineral	zircon	-DL16-88 Spot 52					242.285	44624	1.8198	20.221	1.73599	0.108863	2.99508	0.0159725	2.44066	0.814891	102.151	2.47353	104.925	2.98568	169.367	40.5403	102.151	2.47353	NA
DL16-88	IESNI001P	mineral	zircon	-DL16-88 Spot 50					1082.89	334154	2.53842	20.8699	1.70769	0.10559	2.7898	0.0159894	2.20608	0.790765	102.259	2.23811	101.923	2.70541	95.1405	40.4422	102.259	2.23811	NA
DL16-88	IESNI001P	mineral	zircon	-DL16-88 Spot 64					879.865	35778	1.31079	20.6439	1.63652	0.106909	3.15632	0.0160138	2.69892	0.855084	102.414	2.74223	103.134	3.0954	120.843	38.5737	102.414	2.74223	NA
DL16-88	IESNI001P	mineral	zircon	-DL16-88 Spot 37					1196.8	217769	1.87431	20.9029	1.57077	0.105695	2.57417	0.0160306	2.03938	0.792245	102.52	2.07424	102.02	2.49856	91.3987	37.2183	102.52	2.07424	NA
DL16-88	IESNI001P	mineral	zircon	-DL16-88 Spot 54					519.449	287713	2.41609	20.4593	1.77494	0.108061	3.55839	0.0160416	3.08411	0.866714	102.59	3.13894	104.19	3.52364	141.962	41.6544	102.59	3.13894	NA
DL16-88	IESNI001P	mineral	zircon	-DL16-88 Spot 47					261.464	5338.45	1.75367	22.6516	3.62398	0.0977701	4.94546	0.0160692	3.36517	0.680456	102.765	3.4308	94.7159	4.47233	NA	NA	102.765	3.4308	NA
DL16-88	IESNI001P	mineral	zircon	-DL16-88 Spot 53					639.434	53465.1	1.21549	20.9779	1.789	0.106016	3.02294	0.016137	2.43673	0.806079	103.195	2.49457	102.315	2.9422	82.8578	42.4344	103.195	2.49457	NA
DL16-88	IESNI001P	mineral	zircon	-DL16-88 Spot 49					1041.76	45546.7	1.98553	21.3622	1.17132	0.104734	2.66581	0.0162339	2.39469	0.898297	103.81	2.46601	101.137	2.5662	39.6542	28.0236	103.81	2.46601	NA
DL16-88	IESNI001P	mineral	zircon	-DL16-88 Spot 48					988.546	105720	2.28036	21.0031	1.02064	0.108113	3.27187	0.0164758	3.10861	0.9501	105.345	3.24814	104.238	3.24131	80.0136	24.2378	105.345	3.24814	NA
DL16-88	IESNI001P	mineral	zircon	-DL16-88 Spot 43					1044.89	38795	1.4412	20.1502	1.5708	0.112715	3.02991	0.0164797	2.59094	0.855119	105.369	2.70786	108.446	3.11645	177.554	36.6521	105.369	2.70786	NA
DL16-88	IESNI001P	mineral	zircon	-DL16-88 Spot 63					1345.43	139315	2.83382	20.7457	1.35682	0.109626	3.35304	0.0165016	3.06626	0.914471	105.508	3.20883	105.623	3.36362	109.217	32.0539	105.508	3.20883	NA
DL16-88	IESNI001P	mineral	zircon	-DL16-88 Spot 42					2015.67	189376	1.16576	20.8653	1.04341	0.109407	2.16506	0.0165637	1.89705	0.876209	105.902	1.99259	105.422	2.16797	95.6264	24.7085	105.902	1.99259	NA
DL16-88	IESNI001P	mineral	zircon	-DL16-88 Spot 65					2206.73	269604	4.58076	20.4187	1.15481	0.113724	2.56601	0.0168488	2.29147	0.893007	107.71	2.44763	109.367	2.66051	146.644	27.0696	107.71	2.44763	NA
DL16-88	IESNI001P	mineral	zircon	-DL16-88 Spot 45					1951.52	689111	1.9594	20.523	1.20301	0.113722	2.58319	0.0169346	2.28597	0.884939	108.253	2.45398	109.365	2.67828	134.679	28.2752	108.253	2.45398	NA
HLA-51	IESNI001G	mineral	zircon	-HLA-51 Spot 60					1079.66	191140	5.25335	18.3429	1.52408	0.424909	4.04067	0.0565525	3.74222	0.926138	354.625	12.9125	359.555	12.2353	392.449	34.196	354.625	12.9125	NA	exclude	inheritance
HLA-51	IESNI001G	mineral	zircon	-HLA-51 Spot 67					252.864	66122.3	1.65932	17.9006	1.25882	0.545791	4.14967	0.0708897	3.95413	0.952878	441.514	16.8736	442.236	14.8782	446.943	27.9857	441.514	16.8736	NA	exclude	inheritance
HLA-51	IESNI001G	mineral	zircon	-HLA-51 Spot 46					146.41	197132	2.48485	12.6106	1.57726	2.14147	3.37284	0.195945	2.98133	0.883922	1153.5	31.4887	1162.3	23.3497	1179.61	31.1868	1179.61	31.1868	97.7865	exclude	inheritance
HLA-51	IESNI001G	mineral	zircon	-HLA-51 Spot 66					190.31	328146	1.77591	6.07679	1.45763	8.85061	3.6163	0.390243	3.30953	0.915169	2123.96	59.8882	2322.72	33.0033	2503.05	24.5306	2503.05	24.5306	84.8545	exclude	inheritance
HLA-51	IESNI001G	mineral	zircon	-HLA-51 Spot 38					79.8635	143963	2.07893	5.96121	1.22008	11.5229	2.89634	0.498407	2.62682	0.906945	2606.95	56.3268	2566.44	27.067	2535.32	20.4664	2535.32	20.4664	102.825	exclude	inheritance
HLA-51	IESNI001G	mineral	zircon	-HLA-51 Spot 59					99.0904	934757	2.0921	5.91685	1.21962	10.038	2.87949	0.430951	2.60845	0.905871	2310	50.6422	2438.29	26.5951	2547.84	20.4335	2547.84	20.4335	90.6652	exclude	inheritance
HLA-51	IESNI001G	mineral	zircon	-HLA-51 Spot 69					74.8684	92588.1	2.13488	5.80921	1.57086	9.89707	3.28734	0.417169	2.88773	0.878441	2247.61	54.7994	2425.24	30.325	2578.55	26.2379	2578.55	26.2379	87.1658	exclude	inheritance
HLA-51	IESNI001G	mineral	zircon	-HLA-51 Spot 42					2135.96	4.53018e+06	2.13862	20.4737	1.44435	0.0942273	3.7985	0.0139978	3.51319	0.924887	89.61	3.12639	91.4337	3.32134	140.312	33.9124	89.61	3.12639	NA
HLA-51	IESNI001G	mineral	zircon	-HLA-51 Spot 40					1516.01	589258	2.20964	20.7492	1.33814	0.0955683	3.81648	0.0143881	3.5742	0.936517	92.0908	3.26811	92.6773	3.3804	108.829	31.6033	92.0908	3.26811	NA
HLA-51	IESNI001G	mineral	zircon	-HLA-51 Spot 41					1606.5	226869	1.57736	20.3104	1.36398	0.0978838	3.10476	0.014425	2.7891	0.898331	92.3255	2.5567	94.8211	2.81069	159.101	31.9149	92.3255	2.5567	NA
HLA-51	IESNI001G	mineral	zircon	-HLA-51 Spot 64					2013.68	1.09952e+06	1.91435	20.5992	1.23179	0.0966484	2.9313	0.0144455	2.65993	0.907423	92.4555	2.4417	93.6778	2.62312	125.917	29.0221	92.4555	2.4417	NA
HLA-51	IESNI001G	mineral	zircon	-HLA-51 Spot 70					2066.22	320050	2.46245	20.6097	1.64348	0.0968696	3.46784	0.0144859	3.05367	0.880567	92.7124	2.81087	93.8827	3.10973	124.722	38.6777	92.7124	2.81087	NA
HLA-51	IESNI001G	mineral	zircon	-HLA-51 Spot 43					2260.19	433863	3.58659	20.8001	1.38729	0.0965645	2.70477	0.0145738	2.32189	0.858445	93.2704	2.15005	93.6002	2.41849	103.049	32.8022	93.2704	2.15005	NA
HLA-51	IESNI001G	mineral	zircon	-HLA-51 Spot 63					3016.08	224372	0.917554	20.864	1.33154	0.0966394	3.32828	0.0146298	3.05032	0.916486	93.6267	2.83528	93.6695	2.97812	95.7916	31.5315	93.6267	2.83528	NA
HLA-51	IESNI001G	mineral	zircon	-HLA-51 Spot 55					1884.31	77900.2	2.36952	21.0597	1.75538	0.095872	5.23794	0.0146498	4.93505	0.942173	93.7538	4.59331	92.9587	4.65292	73.6483	41.7401	93.7538	4.59331	NA
HLA-51	IESNI001G	mineral	zircon	-HLA-51 Spot 48					2234.24	238488	1.64453	21.4475	1.6445	0.0954995	4.73603	0.0148616	4.44136	0.93778	95.0992	4.19269	92.6135	4.19214	30.0611	39.3933	95.0992	4.19269	NA
HLA-51	IESNI001G	mineral	zircon	-HLA-51 Spot 61					2846.74	183348	5.34549	20.5407	1.1588	0.100791	2.98034	0.0150219	2.74584	0.921316	96.117	2.61964	97.5058	2.77084	132.607	27.2655	96.117	2.61964	NA
HLA-51	IESNI001G	mineral	zircon	-HLA-51 Spot 65					1266.09	175933	1.99639	20.4378	1.95194	0.101556	4.26985	0.0150601	3.79757	0.889393	96.3596	3.63211	98.2113	3.99707	144.4	45.8105	96.3596	3.63211	NA
HLA-51	IESNI001G	mineral	zircon	-HLA-51 Spot 56					2365.65	131149	3.53677	20.3891	1.68718	0.102172	4.14357	0.0151153	3.78452	0.913348	96.7104	3.63271	98.7793	3.90022	150.021	39.5365	96.7104	3.63271	NA
HLA-51	IESNI001G	mineral	zircon	-HLA-51 Spot 58					1529.63	1.54551e+06	2.10795	20.9892	1.54671	0.0997391	2.83651	0.0151897	2.3777	0.838251	97.1827	2.29339	96.5355	2.6121	81.5843	36.732	97.1827	2.29339	NA
HLA-51	IESNI001G	mineral	zircon	-HLA-51 Spot 37					350.129	32992.2	2.14559	20.9255	1.62788	0.103211	3.40559	0.0156708	2.99132	0.878358	100.237	2.97522	99.7363	3.23513	88.8423	38.6031	100.237	2.97522	NA
HLA-51	IESNI001G	mineral	zircon	-HLA-51 Spot 39					302.754	6089.71	2.19944	21.4812	2.40019	0.102015	3.99219	0.0159005	3.19008	0.799082	101.695	3.21871	98.6349	3.7525	26.3408	57.5511	101.695	3.21871	NA
HLA-51	IESNI001G	mineral	zircon	-HLA-51 Spot 68					765.647	42018.5	3.21433	20.5609	1.73236	0.112811	4.83285	0.0168299	4.51169	0.933547	107.59	4.81384	108.534	4.9747	130.317	40.7283	107.59	4.81384	NA		isolated older age
DL16-26	IESNI001N	mineral	zircon	-DL16-26 Spot 30					232.397	4233.67	1.32966	22.6594	2.61765	0.096038	3.88988	0.0157899	2.87734	0.739699	100.993	2.88326	93.1125	3.46087	NA	NA	100.993	2.88326	NA	exclude	off concordia
DL16-26	IESNI001N	mineral	zircon	-DL16-26 Spot 34					278.92	9022.21	1.53102	21.9607	1.78038	0.099992	3.36331	0.0159331	2.85343	0.848401	101.901	2.88483	96.7689	3.10437	NA	NA	101.901	2.88483	NA	exclude	off concordia
DL16-26	IESNI001N	mineral	zircon	-DL16-26 Spot 9					267.268	2.05643e+06	2.38732	19.1819	2.58072	0.119106	3.84523	0.0165772	2.85056	0.741323	105.987	2.99653	114.261	4.15543	291.206	58.9602	105.987	2.99653	NA	exclude	off concordia
DL16-26	IESNI001N	mineral	zircon	-DL16-26 Spot 23					502.195	54163.2	3.36442	20.2861	1.53072	0.164023	3.08472	0.0241429	2.67814	0.868193	153.786	4.06987	154.218	4.41359	161.894	35.797	153.786	4.06987	NA	exclude	inheritance
DL16-26	IESNI001N	mineral	zircon	-DL16-26 Spot 27					864.881	78147.9	1.75583	20.2845	1.54392	0.164625	3.29814	0.0242298	2.91446	0.883667	154.333	4.44455	154.744	4.73383	162.069	36.0838	154.333	4.44455	NA	exclude	inheritance
DL16-26	IESNI001N	mineral	zircon	-DL16-26 Spot 25					1270.23	73427.2	2.23458	20.366	1.08763	0.179282	2.40905	0.0264929	2.14955	0.892282	168.561	3.57634	167.442	3.71873	152.69	25.4556	168.561	3.57634	NA	exclude	inheritance
DL16-26	IESNI001N	mineral	zircon	-DL16-26 Spot 32					1805.48	1.94968e+06	3.41774	20.1814	1.0344	0.193866	2.76002	0.0283884	2.55885	0.927114	180.454	4.55352	179.923	4.55084	173.945	24.1368	180.454	4.55352	NA	exclude	inheritance
DL16-26	IESNI001N	mineral	zircon	-DL16-26 Spot 24					788.875	257216	2.83592	20.5463	1.22039	0.104378	2.4748	0.0155607	2.15297	0.869957	99.5383	2.12657	100.809	2.37498	131.985	28.6759	99.5383	2.12657	NA
DL16-26	IESNI001N	mineral	zircon	-DL16-26 Spot 21					1176.92	59072.1	2.21757	21.0299	1.66223	0.102126	3.26989	0.0155834	2.81588	0.861154	99.6825	2.78535	98.7373	3.0766	76.9828	39.4919	99.6825	2.78535	NA
DL16-26	IESNI001N	mineral	zircon	-DL16-26 Spot 13					651.795	107424	2.11621	20.4429	1.20927	0.106051	3.49126	0.0157306	3.27514	0.938097	100.617	3.26975	102.347	3.39902	143.823	28.3517	100.617	3.26975	NA
DL16-26	IESNI001N	mineral	zircon	-DL16-26 Spot 8					180.74	8751.34	2.35331	21.0528	2.5898	0.102994	4.29031	0.0157329	3.42048	0.797257	100.631	3.41534	99.5359	4.06779	74.4417	61.5605	100.631	3.41534	NA
DL16-26	IESNI001N	mineral	zircon	-DL16-26 Spot 22					424.005	7926.07	2.3985	21.4602	1.93638	0.101276	3.18889	0.0157699	2.53367	0.794528	100.866	2.53572	97.9536	2.97771	28.645	46.4027	100.866	2.53572	NA
DL16-26	IESNI001N	mineral	zircon	-DL16-26 Spot 12					1093.38	137972	3.08854	21.1394	1.6156	0.103173	3.16426	0.0158251	2.72073	0.859832	101.217	2.73232	99.7013	3.00488	64.6664	38.4578	101.217	2.73232	NA
DL16-26	IESNI001N	mineral	zircon	-DL16-26 Spot 20					282.289	17964.6	1.94638	20.87	1.87278	0.105145	3.04426	0.0159221	2.40004	0.788382	101.832	2.4248	101.515	2.94092	95.1339	44.3536	101.832	2.4248	NA
DL16-26	IESNI001N	mineral	zircon	-DL16-26 Spot 11					807.184	32251.6	2.19991	20.4222	1.2355	0.107858	3.16996	0.0159825	2.91927	0.920919	102.215	2.9604	104.004	3.13368	146.239	28.9772	102.215	2.9604	NA
DL16-26	IESNI001N	mineral	zircon	-DL16-26 Spot 28					326.607	219476	2.09317	20.3739	1.62064	0.108189	3.26718	0.0159935	2.8369	0.868302	102.285	2.87882	104.307	3.23871	151.784	37.9765	102.285	2.87882	NA
DL16-26	IESNI001N	mineral	zircon	-DL16-26 Spot 7					1071.44	52815.6	3.44268	20.4709	1.49156	0.107762	2.96612	0.0160063	2.56381	0.864364	102.366	2.60375	103.916	2.92981	140.601	35.0195	102.366	2.60375	NA
DL16-26	IESNI001N	mineral	zircon	-DL16-26 Spot 10					414.219	54765.1	2.29464	21.2343	1.61637	0.104102	3.50854	0.0160392	3.11403	0.887558	102.575	3.16894	100.555	3.35897	54.0004	38.5853	102.575	3.16894	NA
DL16-26	IESNI001N	mineral	zircon	-DL16-26 Spot 35					217.345	899947	2.14836	21.2974	1.60059	0.104001	2.99299	0.0160714	2.52905	0.844992	102.779	2.57873	100.463	2.8629	46.8639	38.2429	102.779	2.57873	NA
DL16-26	IESNI001N	mineral	zircon	-DL16-26 Spot 16					174.3	11374.8	1.7498	21.321	2.9103	0.103986	3.90374	0.0160868	2.60179	0.666487	102.877	2.6554	100.449	3.73356	44.2541	69.565	102.877	2.6554	NA
DL16-26	IESNI001N	mineral	zircon	-DL16-26 Spot 6					256.89	80759.6	1.88427	20.6679	2.62555	0.107326	3.47969	0.0160949	2.28357	0.656258	102.928	2.33178	103.516	3.42452	118.1	61.8864	102.928	2.33178	NA
DL16-26	IESNI001N	mineral	zircon	-DL16-26 Spot 17					121.679	9289.48	2.83841	20.6935	2.21455	0.107291	3.33496	0.0161096	2.49353	0.747696	103.021	2.54846	103.484	3.28113	115.203	52.2433	103.021	2.54846	NA
DL16-26	IESNI001N	mineral	zircon	-DL16-26 Spot 33					280.491	22177.8	1.89082	20.6429	2.37306	0.107721	3.5556	0.0161346	2.64781	0.744687	103.18	2.71027	103.879	3.51088	120.932	55.9042	103.18	2.71027	NA
DL16-26	IESNI001N	mineral	zircon	-DL16-26 Spot 18					1797.07	222402	3.33031	20.6795	1.12869	0.107713	2.74818	0.016162	2.50571	0.911769	103.354	2.56911	103.871	2.71343	116.777	26.6098	103.354	2.56911	NA
DL16-26	IESNI001N	mineral	zircon	-DL16-26 Spot 29					274.572	5566.54	1.30901	21.6768	2.46227	0.103016	3.92125	0.0162027	3.0518	0.778271	103.612	3.13676	99.5566	3.71861	4.5251	59.3035	103.612	3.13676	NA
DL16-26	IESNI001N	mineral	zircon	-DL16-26 Spot 15					784.225	121819	2.15746	20.6803	1.23634	0.108219	2.83488	0.0162385	2.55108	0.899889	103.839	2.6278	104.335	2.81088	116.664	29.1564	103.839	2.6278	NA
DL16-26	IESNI001N	mineral	zircon	-DL16-26 Spot 26					209.963	8136.31	2.01313	20.9013	2.95934	0.107129	4.29297	0.0162468	3.10997	0.724433	103.892	3.20511	103.335	4.21792	91.5292	70.1219	103.892	3.20511	NA
DL16-26	IESNI001N	mineral	zircon	-DL16-26 Spot 19					1864.66	258602	2.35868	21.4304	1.27205	0.104634	3.18392	0.0162702	2.91877	0.916722	104.04	3.01233	101.045	3.06231	31.9948	30.4703	104.04	3.01233	NA
DL16-26	IESNI001N	mineral	zircon	-DL16-26 Spot 14					1184.85	217981	3.08307	20.9907	1.29664	0.107112	3.08427	0.0163137	2.79847	0.907337	104.316	2.89577	103.32	3.02992	81.4187	30.7595	104.316	2.89577	NA
DL16-26	IESNI001N	mineral	zircon	-DL16-26 Spot 31					2848.09	750781	2.65081	20.5779	1.27845	0.116035	2.80459	0.0173252	2.49626	0.890061	110.729	2.74047	111.471	2.96081	128.398	30.0749	110.729	2.74047	NA		isolated older age
DL16-21	IESNI001O	mineral	zircon	-DL16-21 Spot 16					417.379	47973.3	2.18471	19.273	2.50005	0.116969	4.59906	0.0163572	3.86019	0.839344	104.592	4.00489	112.321	4.89027	280.411	57.2126	104.592	4.00489	NA	exclude	off concordia
DL16-21	IESNI001O	mineral	zircon	-DL16-21 Spot 25					189.057	6442	3.12947	22.5672	2.96318	0.101558	3.95344	0.0166296	2.61711	0.661982	106.319	2.75967	98.2137	3.70096	NA	NA	106.319	2.75967	NA	exclude	off concordia
DL16-21	IESNI001O	mineral	zircon	-DL16-21 Spot 5					303.987	8780.67	2.06366	13.4146	3.91692	0.17616	5.04593	0.0171463	3.18105	0.63042	109.595	3.45682	164.751	7.67396	1056.3	78.9176	109.595	3.45682	NA	exclude	off concordia
DL16-21	IESNI001O	mineral	zircon	-DL16-21 Spot 29					218.606	517227	2.90621	20.3847	1.93845	0.103774	3.7565	0.0153491	3.21771	0.856572	98.1949	3.13569	100.255	3.58612	150.503	45.4529	98.1949	3.13569	NA
DL16-21	IESNI001O	mineral	zircon	-DL16-21 Spot 31					245.193	4568.11	3.4062	22.585	4.32676	0.0954847	5.11183	0.0156474	2.72211	0.532513	100.089	2.70348	92.5998	4.52415	NA	NA	100.089	2.70348	NA
DL16-21	IESNI001O	mineral	zircon	-DL16-21 Spot 32					217.762	4577.52	2.56617	21.7197	2.32607	0.0998793	4.12219	0.0157405	3.40321	0.825583	100.679	3.3997	96.6649	3.80093	NA	NA	100.679	3.3997	NA
DL16-21	IESNI001O	mineral	zircon	-DL16-21 Spot 30					446.659	43269.7	1.66252	20.7838	1.66717	0.104403	4.58611	0.0157444	4.27235	0.931584	100.704	4.26902	100.833	4.40214	104.9	39.397	100.704	4.26902	NA
DL16-21	IESNI001O	mineral	zircon	-DL16-21 Spot 34					290.938	8026.62	2.69153	21.1425	2.01523	0.103179	4.04719	0.0158284	3.50978	0.867215	101.237	3.52546	99.707	3.84355	64.288	48.0026	101.237	3.52546	NA
DL16-21	IESNI001O	mineral	zircon	-DL16-21 Spot 10					254.531	7949.35	2.28436	21.0878	2.07544	0.103852	4.29762	0.0158904	3.76325	0.87566	101.631	3.79462	100.326	4.10548	70.4725	49.3593	101.631	3.79462	NA
DL16-21	IESNI001O	mineral	zircon	-DL16-21 Spot 8					152.442	17679.4	2.72746	21.6396	2.31439	0.101285	3.88974	0.0159032	3.12628	0.803726	101.712	3.15484	97.9621	3.63244	8.69378	55.6926	101.712	3.15484	NA
DL16-21	IESNI001O	mineral	zircon	-DL16-21 Spot 33					436.796	48534.1	2.07943	20.788	1.60483	0.105501	3.77509	0.0159132	3.41698	0.905141	101.776	3.45035	101.842	3.65812	104.417	37.9206	101.776	3.45035	NA
DL16-21	IESNI001O	mineral	zircon	-DL16-21 Spot 17					181.829	24852	2.72279	20.4761	2.56765	0.107516	3.93717	0.0159738	2.9847	0.758083	102.16	3.02513	103.69	3.88095	140.012	60.3058	102.16	3.02513	NA
DL16-21	IESNI001O	mineral	zircon	-DL16-21 Spot 35					173.026	6081.19	2.53206	21.575	2.37646	0.102123	4.13352	0.0159869	3.38207	0.818207	102.243	3.43065	98.7345	3.88908	15.868	57.1081	102.243	3.43065	NA
DL16-21	IESNI001O	mineral	zircon	-DL16-21 Spot 28					317.676	21977.2	1.88942	20.4036	1.49554	0.107988	3.43178	0.0159871	3.08876	0.900047	102.244	3.13318	104.123	3.39619	148.362	35.0554	102.244	3.13318	NA
DL16-21	IESNI001O	mineral	zircon	-DL16-21 Spot 26					200.277	112219	2.5059	19.9975	2.07958	0.110461	3.59773	0.0160278	2.93581	0.816019	102.503	2.98549	106.387	3.63385	195.301	48.3423	102.503	2.98549	NA
DL16-21	IESNI001O	mineral	zircon	-DL16-21 Spot 27					159.554	77591.3	2.62628	20.2067	2.58738	0.109555	3.87078	0.0160626	2.87896	0.743767	102.723	2.93392	105.558	3.88074	171.023	60.4147	102.723	2.93392	NA
DL16-21	IESNI001O	mineral	zircon	-DL16-21 Spot 6					182.487	28972.5	2.54324	21.0626	1.92852	0.105209	3.51706	0.0160788	2.94118	0.83626	102.826	3.0003	101.573	3.39954	73.334	45.8505	102.826	3.0003	NA
DL16-21	IESNI001O	mineral	zircon	-DL16-21 Spot 24					250.939	10356.1	2.47396	21.5154	2.69582	0.103577	3.83442	0.0161697	2.72678	0.711131	103.403	2.79707	100.073	3.6542	22.4997	64.7142	103.403	2.79707	NA
DL16-21	IESNI001O	mineral	zircon	-DL16-21 Spot 1					271.707	133875	1.71481	20.1003	1.86976	0.111058	3.10545	0.0161972	2.47948	0.798428	103.578	2.54766	106.933	3.15189	183.336	43.5766	103.578	2.54766	NA
DL16-21	IESNI001O	mineral	zircon	-DL16-21 Spot 21					369.95	112349	2.57997	21.0647	1.81881	0.106125	3.56197	0.0162204	3.06261	0.859807	103.724	3.15125	102.414	3.47005	73.0662	43.2391	103.724	3.15125	NA
DL16-21	IESNI001O	mineral	zircon	-DL16-21 Spot 22					175.926	76747.6	2.69299	20.4308	2.2778	0.109458	3.50259	0.0162263	2.66078	0.759661	103.762	2.73877	105.469	3.50878	145.211	53.4256	103.762	2.73877	NA
DL16-21	IESNI001O	mineral	zircon	-DL16-21 Spot 23					360.405	119143	2.04318	20.9498	1.76821	0.106784	3.52211	0.0162321	3.0461	0.86485	103.799	3.1365	103.02	3.45048	86.0835	41.9505	103.799	3.1365	NA
DL16-21	IESNI001O	mineral	zircon	-DL16-21 Spot 20					326.172	22669.4	1.67442	20.8574	2.03348	0.107513	3.89964	0.0162708	3.32749	0.853281	104.044	3.43426	103.688	3.84387	96.5441	48.1243	104.044	3.43426	NA
DL16-21	IESNI001O	mineral	zircon	-DL16-21 Spot 9					196.59	9112.11	2.69436	20.822	2.8574	0.107807	4.20614	0.0162876	3.08656	0.733823	104.151	3.18885	103.957	4.15621	100.529	67.5804	104.151	3.18885	NA
DL16-21	IESNI001O	mineral	zircon	-DL16-21 Spot 18					583.456	25827.5	1.46207	20.9692	1.3302	0.107257	3.43053	0.0163191	3.16214	0.921764	104.35	3.27314	103.453	3.3742	83.8483	31.5617	104.35	3.27314	NA
DL16-21	IESNI001O	mineral	zircon	-DL16-21 Spot 4					271.819	21352.6	2.77003	20.7645	1.98099	0.108339	3.21038	0.0163228	2.52631	0.786919	104.374	2.61557	104.445	3.1864	107.119	46.7921	104.374	2.61557	NA
DL16-21	IESNI001O	mineral	zircon	-DL16-21 Spot 2					216.022	66618.7	2.47275	20.9356	1.47506	0.107826	4.11474	0.0163794	3.84126	0.933537	104.733	3.99057	103.975	4.06656	87.6895	34.9662	104.733	3.99057	NA
DL16-21	IESNI001O	mineral	zircon	-DL16-21 Spot 7					186.183	17261.9	2.62598	20.9556	1.85601	0.108043	3.25738	0.016428	2.6769	0.821794	105.041	2.78906	104.174	3.22508	85.4357	44.0218	105.041	2.78906	NA
DL16-21	IESNI001O	mineral	zircon	-DL16-21 Spot 19					166.611	6238.06	2.48558	21.4104	2.41395	0.106428	4.08603	0.0165337	3.29674	0.806832	105.712	3.45663	102.693	3.99088	34.2136	57.8172	105.712	3.45663	NA
DL16-21	IESNI001O	mineral	zircon	-DL16-21 Spot 3					286.317	117991	2.29906	20.465	1.98782	0.113828	3.36942	0.0169024	2.72058	0.807432	108.05	2.91508	109.461	3.49638	141.326	46.6604	108.05	2.91508	NA
HC18-AW-17	IESNI001H	mineral	zircon	Run1-Sample HC18-AW-13 Spot 52					120.19	2179.09	1.89409	22.9347	3.92944	0.0975461	4.17586	0.0162327	1.41324	0.338431	103.802	1.45523	94.5087	3.76847	NA	NA	103.802	1.45523	NA	exclude	off concordia
HC18-AW-17	IESNI001H	mineral	zircon	Run1-Sample HC18-AW-13 Spot 49					167.595	1232.22	1.26664	27.207	1.69487	0.0823481	1.89377	0.0162563	0.844858	0.446124	103.952	0.871206	80.3501	1.463	NA	NA	103.952	0.871206	NA	exclude	off concordia
HC18-AW-17	IESNI001H	mineral	zircon	Run1-Sample HC18-AW-13 Spot 38					133.664	3074.37	1.7193	22.126	2.12017	0.101712	2.48524	0.0163291	1.29664	0.521738	104.414	1.34297	98.3552	2.32971	NA	NA	104.414	1.34297	NA	exclude	off concordia
HC18-AW-17	IESNI001H	mineral	zircon	Run1-Sample HC18-AW-13 Spot 50					143.453	3152.95	1.71423	22.1788	1.55661	0.102018	1.79885	0.0164174	0.901584	0.501199	104.974	0.938766	98.6378	1.69089	NA	NA	104.974	0.938766	NA	exclude	off concordia
HC18-AW-17	IESNI001H	mineral	zircon	Run1-Sample HC18-AW-13 Spot 60					184.27	27926.7	1.62436	19.718	1.28234	0.115858	1.55911	0.0165759	0.886804	0.56879	105.979	0.932146	111.31	1.64371	226.895	29.6408	105.979	0.932146	NA	exclude	off concordia
HC18-AW-17	IESNI001H	mineral	zircon	Run1-Sample HC18-AW-13 Spot 40					281.134	29349.9	1.23784	19.9864	1.17799	0.114674	1.69392	0.0166298	1.21725	0.7186	106.321	1.28358	110.232	1.76946	195.582	27.3848	106.321	1.28358	NA	exclude	off concordia
HC18-AW-17	IESNI001H	mineral	zircon	Run1-Sample HC18-AW-13 Spot 41					210.565	6661.45	1.56829	22.1991	1.66714	0.10345	2.01266	0.016663	1.12758	0.560245	106.532	1.19136	99.9561	1.91593	NA	NA	106.532	1.19136	NA	exclude	off concordia
HC18-AW-17	IESNI001H	mineral	zircon	Run1-Sample HC18-AW-13 Spot 39					186.001	1808.98	1.70515	24.6468	1.83432	0.0936207	2.08309	0.0167425	0.987181	0.473902	107.036	1.04791	90.8707	1.81069	NA	NA	107.036	1.04791	NA	exclude	off concordia
HC18-AW-17	IESNI001H	mineral	zircon	Run1-Sample HC18-AW-13 Spot 48					163.001	3028.65	1.40105	21.9477	1.81552	0.10551	2.02148	0.0168024	0.888963	0.43976	107.415	0.946972	101.85	1.95899	NA	NA	107.415	0.946972	NA	exclude	off concordia
HC18-AW-17	IESNI001H	mineral	zircon	Run1-Sample HC18-AW-13 Spot 47					118.805	1975.91	1.76626	23.2016	2.68043	0.099914	2.9255	0.0168203	1.17212	0.400657	107.529	1.24991	96.6969	2.69835	NA	NA	107.529	1.24991	NA	exclude	off concordia
HC18-AW-17	IESNI001H	mineral	zircon	Run1-Sample HC18-AW-13 Spot 46					188.745	5073.11	1.57815	22.3295	1.49603	0.104911	1.70606	0.0169975	0.820075	0.480685	108.652	0.883565	101.299	1.64481	NA	NA	108.652	0.883565	NA	exclude	off concordia
HC18-AW-17	IESNI001H	mineral	zircon	Run1-Sample HC18-AW-13 Spot 56					778.98	279355	0.965938	20.0074	0.890966	0.117225	1.45447	0.0170176	1.14964	0.790417	108.779	1.24008	112.553	1.54959	193.149	20.7393	108.779	1.24008	NA	exclude	off concordia
HC18-AW-17	IESNI001H	mineral	zircon	Run1-Sample HC18-AW-13 Spot 54					169.154	7927.44	1.95304	15.0297	3.76196	0.156442	3.92412	0.0170604	1.11641	0.2845	109.051	1.20721	147.584	5.39019	822.368	78.5692	109.051	1.20721	NA	exclude	off concordia
HC18-AW-17	IESNI001H	mineral	zircon	Run1-Sample HC18-AW-13 Spot 37					162.048	2212.87	1.7696	16.8066	6.60928	0.141077	6.67169	0.0172038	0.910413	0.136459	109.959	0.992596	134.003	8.37562	584.531	143.63	109.959	0.992596	NA	exclude	off concordia
HC18-AW-17	IESNI001H	mineral	zircon	Run1-Sample HC18-AW-13 Spot 57					209.886	46301.3	2.85911	17.5556	1.46585	0.135529	1.70359	0.0172638	0.868038	0.509535	110.34	0.949642	129.054	2.06457	489.088	32.3207	110.34	0.949642	NA	exclude	off concordia
HC18-AW-17	IESNI001H	mineral	zircon	Run1-Sample HC18-AW-13 Spot 36					433.399	7463.61	1.33876	21.0794	0.889131	0.146207	1.29563	0.0223622	0.942391	0.727362	142.568	1.3288	138.558	1.6781	70.3826	21.163	142.568	1.3288	NA	exclude	off concordia
HC18-AW-17	IESNI001H	mineral	zircon	Run1-Sample HC18-AW-13 Spot 44					262.408	8227.67	2.54615	18.0423	2.32534	0.195384	2.56337	0.0255781	1.07873	0.420825	162.813	1.73432	181.213	4.25427	428.433	51.8492	162.813	1.73432	NA	exclude	off concordia
HC18-AW-17	IESNI001H	mineral	zircon	Run1-Sample HC18-AW-13 Spot 53					3507.46	32364.8	1.80719	20.367	0.694321	0.14779	1.35509	0.0218404	1.1637	0.858759	139.277	1.60337	139.959	1.77167	151.526	16.263	139.277	1.60337	NA	exclude	inheritance
HC18-AW-17	IESNI001H	mineral	zircon	Run1-Sample HC18-AW-13 Spot 51					149.035	3647.46	1.61258	22.2226	4.82079	0.101495	4.88945	0.0163655	0.816517	0.166996	104.645	0.847546	98.1558	4.57463	NA	NA	104.645	0.847546	NA
HC18-AW-17	IESNI001H	mineral	zircon	Run1-Sample HC18-AW-13 Spot 55					288.886	6166.48	1.21174	20.7718	2.03917	0.109225	2.38849	0.0164621	1.24366	0.520689	105.257	1.29841	105.256	2.38812	105.21	48.2053	105.257	1.29841	NA
HC18-AW-17	IESNI001H	mineral	zircon	Run1-Sample HC18-AW-13 Spot 59					135.104	31629.8	1.80973	20.4213	1.59615	0.111448	1.85546	0.0165136	0.946066	0.509882	105.584	0.990759	107.289	1.88914	145.282	37.4207	105.584	0.990759	NA
HC18-AW-17	IESNI001H	mineral	zircon	Run1-Sample HC18-AW-13 Spot 42					174.509	2636.12	1.32889	22.253	4.46515	0.103482	4.59218	0.0167087	1.07263	0.233578	106.821	1.13636	99.9857	4.37273	NA	NA	106.821	1.13636	NA
HC18-AW-17	IESNI001H	mineral	zircon	Run1-Sample HC18-AW-13 Spot 45					145.706	5387.84	1.46525	21.6058	3.22083	0.106918	3.36233	0.0167613	0.965141	0.287046	107.155	1.02565	103.142	3.29767	11.4112	77.4846	107.155	1.02565	NA
HC18-AW-17	IESNI001H	mineral	zircon	Run1-Sample HC18-AW-13 Spot 58					229.524	5212.63	1.28133	21.2167	1.33503	0.110101	1.63306	0.0169494	0.940515	0.575922	108.347	1.01051	106.057	1.6446	54.919	31.8493	108.347	1.01051	NA
HC18-AW-17	IESNI001H	mineral	zircon	Run1-Sample HC18-AW-13 Spot 43					122.127	22575.4	1.90695	19.737	2.17745	0.118437	2.3595	0.0169612	0.90881	0.385171	108.422	0.977107	113.654	2.53703	224.661	50.3446	108.422	0.977107	NA
HC18-AW-17	IESNI001H	mineral	zircon	Run1-Sample HC18-AW-13 Spot 63					244.611	12027.1	2.05338	20.3731	0.9548	0.114883	1.26872	0.0169826	0.835467	0.658512	108.557	0.899368	110.423	1.32747	150.851	22.351	108.557	0.899368	NA
HC18-AW-17	IESNI001H	mineral	zircon	Run1-Sample HC18-AW-13 Spot 61					234.927	121458	1.18015	20.1727	1.06391	0.116064	1.58117	0.0169883	1.16969	0.739766	108.594	1.25957	111.497	1.66962	173.934	24.8382	108.594	1.25957	NA
HC18-AW-17	IESNI001H	mineral	zircon	Run1-Sample HC18-AW-13 Spot 62					167.277	22135.6	1.76074	19.7969	1.69527	0.119179	2.03422	0.0171192	1.12432	0.552705	109.424	1.21989	114.327	2.19952	217.686	39.2638	109.424	1.21989	NA
HC18-AW-17	IESNI001H	mineral	zircon	Run1-Sample HC18-AW-13 Spot 65					248.771	5150.29	1.26222	21.4286	1.4603	0.111223	2.11819	0.0172933	1.53436	0.724373	110.527	1.68142	107.084	2.15273	31.13	34.979	110.527	1.68142	NA
HC18-AW-17	IESNI001H	mineral	zircon	Run1-Sample HC18-AW-13 Spot 64					291.886	5801.37	1.90596	21.183	1.51787	0.113403	1.92039	0.0174301	1.17642	0.612593	111.394	1.2992	109.074	1.98606	58.7294	36.1771	111.394	1.2992	NA
HL16-61	IESNI001S	mineral	zircon	-HL16-61 Spot 65					145.825	4891.66	2.67473	11.9175	9.6272	0.242877	9.80465	0.0210019	1.85693	0.189393	133.985	2.46233	220.774	19.4569	1290.46	187.771	133.985	2.46233	NA	exclude	off concordia
HL16-61	IESNI001S	mineral	zircon	-HL16-61 Spot 49					241.871	6042.07	1.8182	17.5423	3.07146	0.182508	3.26276	0.0232304	1.10081	0.337385	148.04	1.61106	170.216	5.11325	491.752	67.7595	148.04	1.61106	NA	exclude	off concordia
HL16-61	IESNI001S	mineral	zircon	-HL16-61 Spot 68					477.565	5965.19	1.73612	16.1343	3.09555	0.200724	3.3818	0.0234983	1.36167	0.402647	149.728	2.01531	185.738	5.74035	673.407	66.223	149.728	2.01531	NA	exclude	off concordia
HL16-61	IESNI001S	mineral	zircon	-HL16-61 Spot 48					652.568	3456.49	2.27658	12.7471	4.13582	0.27056	4.35723	0.0250243	1.3713	0.314718	159.331	2.15813	243.141	9.42152	1158.26	82.0427	159.331	2.15813	NA	exclude	off concordia
HL16-61	IESNI001S	mineral	zircon	-HL16-61 Spot 43 core					219.227	864.799	1.9605	6.0484	22.0237	0.59452	22.7086	0.0260912	5.53502	0.243742	166.038	9.07292	473.75	86.1781	2510.93	375.383	166.038	9.07292	NA	exclude	off concordia
HL16-61	IESNI001S	mineral	zircon	-HL16-61 Spot 69					210.435	59752.6	2.34283	20.2165	1.83197	0.17291	2.24845	0.0253638	1.30362	0.579784	161.466	2.07876	161.941	3.36566	169.888	42.758	161.466	2.07876	NA	exclude	inheritance
HL16-61	IESNI001S	mineral	zircon	-HL16-61 Spot 36					369.077	1.31683e+06	2.29594	19.8659	1.12931	0.185864	2.00581	0.0267911	1.65769	0.826442	170.433	2.78823	173.094	3.19213	210.611	26.1793	170.433	2.78823	NA	exclude	inheritance
HL16-61	IESNI001S	mineral	zircon	-HL16-61 Spot 58					681.141	74968.8	0.964703	19.961	0.824931	0.157952	1.64866	0.0228768	1.42744	0.865815	145.812	2.05801	148.909	2.28348	199.55	19.1786	145.812	2.05801	NA
HL16-61	IESNI001S	mineral	zircon	-HL16-61 Spot 64					402.858	52772	1.7131	20.4166	0.883857	0.154502	1.66646	0.0228878	1.41276	0.84776	145.881	2.03781	145.879	2.26446	146.885	20.7044	145.881	2.03781	NA
HL16-61	IESNI001S	mineral	zircon	-HL16-61 Spot 67					156.113	28009.4	2.69866	19.5859	1.98378	0.161828	2.47409	0.0229977	1.47843	0.597566	146.574	2.14254	152.302	3.49912	243.43	45.7196	146.574	2.14254	NA
HL16-61	IESNI001S	mineral	zircon	-HL16-61 Spot 61 core					271.627	29772.9	1.61241	19.9863	1.4639	0.15872	2.02902	0.0230172	1.40497	0.692435	146.696	2.03776	149.582	2.82209	196.614	34.0186	146.696	2.03776	NA
HL16-61	IESNI001S	mineral	zircon	-HL16-61 Spot 62					219.662	9371.11	1.81104	21.0509	1.33425	0.151496	1.84244	0.0231398	1.27057	0.689615	147.469	1.85243	143.232	2.46128	74.6247	31.6983	147.469	1.85243	NA
HL16-61	IESNI001S	mineral	zircon	-HL16-61 Spot 37					486.295	36775.7	2.70008	20.4465	1.03636	0.156239	1.63821	0.023179	1.26874	0.774463	147.716	1.85282	147.406	2.24772	143.44	24.2962	147.716	1.85282	NA
HL16-61	IESNI001S	mineral	zircon	-HL16-61 Spot 56					251.573	14721.4	2.38119	20.4241	1.09611	0.156514	1.53223	0.0231945	1.07064	0.698745	147.813	1.56454	147.647	2.10551	146.022	25.6957	147.813	1.56454	NA
HL16-61	IESNI001S	mineral	zircon	-HL16-61 Spot 66					204.178	17398.5	1.9667	20.6591	1.31028	0.156559	1.84234	0.0234681	1.29514	0.702987	149.537	1.91442	147.686	2.53227	119.076	30.8829	149.537	1.91442	NA
HL16-61	IESNI001S	mineral	zircon	-HL16-61 Spot 55					213.292	75778.1	2.20564	20.1928	1.11406	0.160422	1.60029	0.0235042	1.14882	0.717883	149.765	1.7007	151.072	2.24634	172.629	25.9842	149.765	1.7007	NA
HL16-61	IESNI001S	mineral	zircon	-HL16-61 Spot 41					297.04	19885.9	1.75183	20.3898	1.21442	0.15972	1.767	0.0236298	1.28353	0.726392	150.556	1.91004	150.458	2.471	149.945	28.4447	150.556	1.91004	NA
HL16-61	IESNI001S	mineral	zircon	-HL16-61 Spot 63					374.242	698465	1.88508	19.9571	1.26773	0.16342	1.77049	0.0236642	1.23592	0.698066	150.772	1.8418	153.693	2.52519	199.958	29.4415	150.772	1.8418	NA
HL16-61	IESNI001S	mineral	zircon	-HL16-61 Spot 38					392.881	65207.8	1.73189	19.9669	1.06548	0.163447	1.60336	0.0236797	1.19813	0.747262	150.87	1.78663	153.716	2.28715	198.839	24.771	150.87	1.78663	NA
HL16-61	IESNI001S	mineral	zircon	-HL16-61 Spot 60					327.109	42128.2	1.49215	20.3212	1.28607	0.160843	1.80093	0.0237158	1.26071	0.70003	151.097	1.88274	151.441	2.53371	157.863	30.0762	151.097	1.88274	NA
HL16-61	IESNI001S	mineral	zircon	-HL16-61 Spot 40					155.777	38470.9	1.83207	20.4814	1.53601	0.160214	2.11621	0.0238093	1.45569	0.687875	151.686	2.1823	150.89	2.96723	139.433	36.0639	151.686	2.1823	NA
HL16-61	IESNI001S	mineral	zircon	-HL16-61 Spot 70					554.046	61984.5	1.62478	20.6753	0.861859	0.159058	1.47734	0.0238613	1.19989	0.812196	152.013	1.80266	149.878	2.05855	117.24	20.3321	152.013	1.80266	NA
HL16-61	IESNI001S	mineral	zircon	-HL16-61 Spot 57					159.001	16542.3	2.59034	20.8212	1.6257	0.158511	2.46264	0.0239471	1.84978	0.751138	152.553	2.78878	149.399	3.42131	100.639	38.4511	152.553	2.78878	NA
HL16-61	IESNI001S	mineral	zircon	-HL16-61 Spot 59					359.803	34918.3	2.97099	20.8801	1.33527	0.161597	1.90832	0.0244824	1.36336	0.714428	155.923	2.10028	152.1	2.69563	93.9519	31.6005	155.923	2.10028	NA		isolated older age
HL16-61	IESNI001S	mineral	zircon	-HL16-61 Spot 39					221.562	45368.6	2.12969	20.6322	1.14285	0.164541	1.73528	0.0246325	1.30579	0.752495	156.867	2.02363	154.671	2.48955	122.185	26.9194	156.867	2.02363	NA		isolated older age
D-142	IESNI001T	mineral	zircon	D-142-18					2245.42	40580.4	1.02343	20.0011	1.78165	0.159931	4.7569	0.0231999	4.41065	0.927211	147.848	6.44683	150.643	6.6598	194.889	41.4239	147.848	6.44683	NA
D-142	IESNI001T	mineral	zircon	D-142-19					459.969	17973.4	1.59333	19.9101	7.82304	0.164965	8.41426	0.0238212	3.09836	0.368227	151.761	4.64718	155.04	12.0989	205.47	181.706	151.761	4.64718	NA
D-142	IESNI001T	mineral	zircon	D-142-20					638.859	34904.5	0.905739	19.9198	4.32278	0.165318	4.62534	0.0238838	1.6454	0.355736	152.155	2.47425	155.348	6.66279	204.306	100.357	152.155	2.47425	NA
D-142	IESNI001T	mineral	zircon	D-142-17					430.69	12853.8	1.37183	20.555	7.11284	0.161152	7.93455	0.0240244	3.51634	0.443168	153.04	5.31803	151.711	11.1819	131.014	167.458	153.04	5.31803	NA
D-142	IESNI001T	mineral	zircon	D-142-3					1526.31	42799.4	1.62967	20.0029	2.08354	0.16592	2.72809	0.0240708	1.76107	0.64553	153.332	2.66842	155.872	3.94205	194.682	48.4367	153.332	2.66842	NA
D-142	IESNI001T	mineral	zircon	D-142-7					1803.48	16654.7	1.4475	19.9035	2.3366	0.16685	2.59725	0.0240855	1.13403	0.436629	153.425	1.71935	156.682	3.771	206.217	54.2219	153.425	1.71935	NA
D-142	IESNI001T	mineral	zircon	D-142-22					785.833	20571.5	1.83173	20.4269	5.66508	0.167024	5.97101	0.0247445	1.88677	0.315987	157.572	2.93697	156.833	8.67735	145.703	132.972	157.572	2.93697	NA
D-142	IESNI001T	mineral	zircon	D-142-11					283.93	8742.75	1.0552	19.4548	5.38458	0.176009	6.12654	0.0248348	2.92246	0.477016	158.14	4.56535	164.62	9.31068	258.865	123.769	158.14	4.56535	NA
D-142	IESNI001T	mineral	zircon	D-142-15					316.671	13266.4	1.16524	20.9716	12.475	0.16377	12.8106	0.0249095	2.9129	0.227383	158.61	4.56377	153.998	18.3068	83.5704	296.961	158.61	4.56377	NA
D-142	IESNI001T	mineral	zircon	D-142-13					1615.6	5377.32	0.47637	19.9968	3.80367	0.172518	4.33435	0.0250204	2.07814	0.479459	159.307	3.27006	161.602	6.47553	195.384	88.4151	159.307	3.27006	NA
D-142	IESNI001T	mineral	zircon	D-142-10					446.751	19840.9	1.59432	20.444	8.13261	0.169097	8.41987	0.0250727	2.18057	0.258979	159.636	3.43822	158.635	12.3664	143.724	191.07	159.636	3.43822	NA
D-142	IESNI001T	mineral	zircon	D-142-5					462.14	19911.2	0.974279	19.8773	2.77245	0.175348	3.33906	0.0252787	1.86087	0.557304	160.931	2.95766	164.049	5.05815	209.288	64.285	160.931	2.95766	NA
D-142	IESNI001T	mineral	zircon	D-142-2					545.218	20123	1.35947	19.4491	2.79438	0.180541	4.71879	0.0254668	3.80243	0.805806	162.114	6.08742	168.526	7.32763	259.509	64.1981	162.114	6.08742	NA
D-142	IESNI001T	mineral	zircon	D-142-6					296.015	10981.8	1.46446	19.6326	6.99818	0.179554	7.365	0.0255665	2.29536	0.311658	162.741	3.68872	167.677	11.3841	237.909	161.569	162.741	3.68872	NA
D-142	IESNI001T	mineral	zircon	D-142-12					2069.25	82270.5	0.442824	19.9657	1.56455	0.178077	2.28813	0.0257864	1.66966	0.729702	164.123	2.7057	166.405	3.51195	198.995	36.3636	164.123	2.7057	NA
D-142	IESNI001T	mineral	zircon	D-142-1					801.866	51732.3	1.17981	20.8085	3.49763	0.170969	4.586	0.0258021	2.96614	0.646781	164.221	4.80952	160.259	6.79894	102.117	82.7159	164.221	4.80952	NA
D-142	IESNI001T	mineral	zircon	D-142-9					625.754	21348.9	1.04251	20.1016	3.80582	0.17845	4.27635	0.0260163	1.9501	0.45602	165.567	3.18762	166.726	6.57527	183.176	88.6788	165.567	3.18762	NA
D-142	IESNI001T	mineral	zircon	D-142-23					118.344	6464.55	1.66541	19.7286	18.9838	0.182898	19.6968	0.02617	5.25137	0.266611	166.533	8.63328	170.551	30.9329	226.641	442.189	166.533	8.63328	NA
D-142	IESNI001T	mineral	zircon	D-142-25					406.029	30550.5	1.09345	20.1826	5.44323	0.17889	8.5834	0.0261856	6.63671	0.773203	166.631	10.9171	167.105	13.2259	173.806	127.094	166.631	10.9171	NA
D-142	IESNI001T	mineral	zircon	D-142-14					265.118	12697.4	1.46664	19.0872	8.883	0.190098	9.62533	0.0263158	3.70664	0.385093	167.449	6.12682	176.713	15.6126	302.524	202.855	167.449	6.12682	NA
D-142	IESNI001T	mineral	zircon	D-142-8					375.555	11836.9	1.0333	21.6637	3.6326	0.16906	5.07358	0.0265627	3.54194	0.698116	168.999	5.90808	158.603	7.45	5.97252	87.463	168.999	5.90808	NA
D-142	IESNI001T	mineral	zircon	D-142-4					292.927	14822.3	1.15549	20.3202	12.6504	0.181966	12.9847	0.0268174	2.92748	0.225456	170.598	4.92873	169.751	20.3004	157.929	297.056	170.598	4.92873	NA
D-142	IESNI001T	mineral	zircon	D-142-24					407.046	17066.1	1.50474	20.2127	7.31373	0.184274	8.28017	0.0270139	3.88208	0.468841	171.832	6.58255	171.732	13.0829	170.324	170.978	171.832	6.58255	NA
D-142	IESNI001T	mineral	zircon	D-142-21					526.462	15027.9	0.754177	19.8343	7.23423	0.193153	9.5262	0.0277855	6.19794	0.65062	176.673	10.8014	179.316	15.6599	214.32	167.747	176.673	10.8014	NA
NR15-46	IESNI001W	mineral	zircon	NR15-46 Spot 32					102.429	2991.85	1.87225	22.3257	2.97247	0.153475	3.8813	0.0248509	2.49578	0.643027	158.241	3.90126	144.975	5.24372	66.9638	72.5739	158.241	3.90126	NA	exclude	off concordia
NR15-46	IESNI001W	mineral	zircon	NR15-46 Spot 18					120.496	1892.01	1.74014	23.81	5.82777	0.145225	6.17628	0.0250783	2.04537	0.331166	159.671	3.22575	137.687	7.9527	226.563	146.89	159.671	3.22575	NA	exclude	off concordia
NR15-46	IESNI001W	mineral	zircon	NR15-46 Spot 30					86.8499	1535.51	2.13778	26.1056	2.58832	0.132814	3.28264	0.0251463	2.01899	0.615051	160.099	3.19258	126.623	3.90786	463.966	68.4066	160.099	3.19258	NA	exclude	off concordia
NR15-46	IESNI001W	mineral	zircon	NR15-46 Spot 1					109.215	2175.9	1.81047	22.1961	2.43779	0.156994	3.34908	0.0252731	2.29641	0.685685	160.896	3.64911	148.068	4.61434	52.7721	59.3634	160.896	3.64911	NA	exclude	off concordia
NR15-46	IESNI001W	mineral	zircon	NR15-46 Spot 5					132.664	3665.15	1.59295	21.5147	1.52048	0.163133	3.17443	0.0254552	2.7866	0.877827	162.041	4.45916	153.442	4.52076	22.5839	36.4956	162.041	4.45916	NA	exclude	off concordia
NR15-46	IESNI001W	mineral	zircon	NR15-46 Spot 25					212.442	8195.77	1.46111	21.1242	0.938366	0.166318	2.42717	0.025481	2.23844	0.922243	162.203	3.58553	156.218	3.51441	66.3647	22.3371	162.203	3.58553	NA	exclude	off concordia
NR15-46	IESNI001W	mineral	zircon	NR15-46 Spot 27					88.6234	2335.61	1.84751	23.1156	1.86535	0.152482	2.56035	0.0255637	1.75382	0.68499	162.723	2.81814	144.101	3.43967	152.556	46.3078	162.723	2.81814	NA	exclude	off concordia
NR15-46	IESNI001W	mineral	zircon	NR15-46 Spot 24					147.666	2748.52	1.6105	22.7901	1.68395	0.154707	2.53463	0.0255715	1.89437	0.747395	162.772	3.04489	146.06	3.44813	117.471	41.5196	162.772	3.04489	NA	exclude	off concordia
NR15-46	IESNI001W	mineral	zircon	NR15-46 Spot 7					86.2764	2920.86	2.21122	22.306	1.71549	0.158129	2.59863	0.0255819	1.95191	0.75113	162.838	3.13863	149.064	3.60273	64.8085	41.8689	162.838	3.13863	NA	exclude	off concordia
NR15-46	IESNI001W	mineral	zircon	NR15-46 Spot 29					134.9	2172.98	1.9531	22.9672	1.4052	0.153584	2.43661	0.025583	1.9906	0.816953	162.844	3.20097	145.071	3.29392	136.59	34.7749	162.844	3.20097	NA	exclude	off concordia
NR15-46	IESNI001W	mineral	zircon	NR15-46 Spot 21					133.918	2355.2	2.04024	23.271	1.56351	0.151929	2.55812	0.0256422	2.0247	0.79148	163.216	3.26317	143.614	3.42585	169.216	38.941	163.216	3.26317	NA	exclude	off concordia
NR15-46	IESNI001W	mineral	zircon	NR15-46 Spot 28					191.24	5945.82	1.50716	21.5454	1.35784	0.164589	2.26038	0.025719	1.8071	0.799466	163.699	2.92096	154.712	3.24371	19.1867	32.5981	163.699	2.92096	NA	exclude	off concordia
NR15-46	IESNI001W	mineral	zircon	NR15-46 Spot 4					183.123	6722.19	2.49226	21.2413	1.15574	0.168826	2.25731	0.0260088	1.93899	0.858985	165.52	3.16857	158.4	3.31064	53.1626	27.5581	165.52	3.16857	NA	exclude	off concordia
NR15-46	IESNI001W	mineral	zircon	NR15-46 Spot 14					127.66	2969.87	1.60362	21.82	2.02092	0.165669	2.62995	0.0262176	1.68301	0.63994	166.832	2.77178	155.653	3.79528	11.319	48.7986	166.832	2.77178	NA	exclude	off concordia
NR15-46	IESNI001W	mineral	zircon	NR15-46 Spot 16					108.954	3007.79	1.97349	15.8961	6.16916	0.234164	6.42344	0.0269966	1.78945	0.278581	171.724	3.03233	213.63	12.3756	705.133	131.376	171.724	3.03233	NA	exclude	off concordia
NR15-46	IESNI001W	mineral	zircon	NR15-46 Spot 22					152.658	16679.4	1.4754	20.7302	1.406	0.16633	2.35004	0.0250077	1.88304	0.80128	159.228	2.96159	156.229	3.40296	110.972	33.1932	159.228	2.96159	NA
NR15-46	IESNI001W	mineral	zircon	NR15-46 Spot 11					249.023	1.56193e+06	1.40111	20.1109	1.09249	0.173301	1.9439	0.0252773	1.60785	0.82713	160.922	2.55537	162.28	2.91538	182.106	25.4656	160.922	2.55537	NA
NR15-46	IESNI001W	mineral	zircon	NR15-46 Spot 33					210.286	16216.5	1.4369	20.5626	1.35507	0.169803	2.01668	0.0253234	1.49357	0.740611	161.212	2.37796	159.248	2.97235	130.152	31.8824	161.212	2.37796	NA
NR15-46	IESNI001W	mineral	zircon	NR15-46 Spot 10					163.792	11468.8	1.51709	20.1258	1.20598	0.174415	2.39669	0.0254588	2.07117	0.86418	162.063	3.31477	163.243	3.61415	180.372	28.1138	162.063	3.31477	NA
NR15-46	IESNI001W	mineral	zircon	NR15-46 Spot 13-R4					129.624	21424.1	2.21874	20.4758	1.30168	0.171634	2.69436	0.0254884	2.35907	0.875558	162.25	3.77981	160.836	4.00772	140.081	30.5569	162.25	3.77981	NA
NR15-46	IESNI001W	mineral	zircon	NR15-46 Spot 34					167.662	6041.15	1.48868	21.3529	2.10275	0.165097	2.83396	0.0255679	1.89993	0.670416	162.749	3.05342	155.155	4.07757	40.6901	50.2875	162.749	3.05342	NA
NR15-46	IESNI001W	mineral	zircon	NR15-46 Spot 17-C4					120.135	5656.18	1.70325	21.0258	1.69793	0.167869	2.59133	0.0255989	1.95755	0.755424	162.944	3.14974	157.568	3.78208	77.4481	40.3462	162.944	3.14974	NA
NR15-46	IESNI001W	mineral	zircon	NR15-46 Spot 31					115.79	49630.4	1.84581	20.0057	1.44134	0.176854	2.68929	0.0256605	2.27042	0.844245	163.332	3.66173	165.349	4.10356	194.357	33.5054	163.332	3.66173	NA
NR15-46	IESNI001W	mineral	zircon	NR15-46 Spot 3					346.056	16991.3	1.52718	20.8337	0.982101	0.169824	2.05216	0.0256605	1.8019	0.87805	163.332	2.90611	159.266	3.02498	99.2451	23.2585	163.332	2.90611	NA
NR15-46	IESNI001W	mineral	zircon	NR15-46 Spot 26-R2					145.862	30846.2	2.59271	20.3749	1.23758	0.173884	2.23217	0.0256952	1.85769	0.832233	163.55	3.00002	162.784	3.35732	151.67	28.9963	163.55	3.00002	NA
NR15-46	IESNI001W	mineral	zircon	NR15-46 Spot 19-R3					258.405	14433.7	1.15586	20.2313	0.885335	0.17522	2.27273	0.0257102	2.0932	0.921007	163.644	3.38228	163.939	3.44067	168.176	20.6758	163.644	3.38228	NA
NR15-46	IESNI001W	mineral	zircon	NR15-46 Spot 8-C2					141.698	5375	1.86521	21.4076	2.76099	0.165953	3.62583	0.0257662	2.35023	0.648191	163.996	3.80566	155.9	5.24015	34.5295	66.1171	163.996	3.80566	NA
NR15-46	IESNI001W	mineral	zircon	NR15-46 Spot 6					192.95	19574.9	1.43174	20.703	1.21885	0.172051	2.1543	0.025834	1.77635	0.824558	164.422	2.88376	161.198	3.21106	114.069	28.7529	164.422	2.88376	NA
NR15-46	IESNI001W	mineral	zircon	NR15-46 Spot 12					300.496	99946.6	1.44316	19.9624	0.914194	0.178889	1.98767	0.0258997	1.76495	0.887953	164.835	2.87238	167.104	3.06257	199.393	21.2497	164.835	2.87238	NA
NR15-46	IESNI001W	mineral	zircon	NR15-46 Spot 35					114.156	17161.6	2.05719	19.6541	2.12051	0.183274	3.25545	0.0261247	2.4701	0.758758	166.249	4.05401	170.874	5.11989	235.424	48.932	166.249	4.05401	NA
NR15-46	IESNI001W	mineral	zircon	NR15-46 Spot 9					1667.38	4.31374e+06	1.58422	20.1966	0.636555	0.179494	1.8624	0.0262922	1.75024	0.939775	167.301	2.89049	167.625	2.87779	172.192	14.8389	167.301	2.89049	NA
NR15-46	IESNI001W	mineral	zircon	NR15-46 Spot 15					967.039	22841.2	3.17267	20.3199	0.630486	0.178998	1.47535	0.0263797	1.33385	0.904088	167.85	2.20997	167.198	2.27437	157.996	14.7422	167.85	2.20997	NA
NR15-46	IESNI001W	mineral	zircon	NR15-46 Spot 23-C3					215.243	8810.51	1.25958	20.6872	1.4199	0.176947	2.9521	0.0265488	2.5882	0.876732	168.912	4.315	165.43	4.50661	115.879	33.5093	168.912	4.315	NA
NR15-46	IESNI001W	mineral	zircon	NR15-46 Spot 2-C1					404.694	30283.1	1.17827	20.0646	0.950199	0.212112	1.84855	0.030867	1.58564	0.857775	195.972	3.06065	195.323	3.28461	187.464	22.1174	195.972	3.06065	NA	exclude	inheritance
NR15-46	IESNI001W	mineral	zircon	NR15-46 Spot 20-R1					379.28	14548.4	2.42325	19.9859	1.09362	0.217764	1.80514	0.0315652	1.43615	0.795588	200.337	2.83288	200.047	3.27767	196.652	25.4353	200.337	2.83288	NA	exclude	inheritance
VT16-11	IESNI001X	mineral	zircon	-VT16-11 Spot 29					947.262	84743.6	1.55541	18.9351	1.42109	0.193759	2.83553	0.0266205	2.45372	0.865348	169.363	4.10157	179.831	4.67317	320.747	32.287	169.363	4.10157	NA	exclude	off concordia
VT16-11	IESNI001X	mineral	zircon	-VT16-11 Spot 20					1559.97	37049.2	1.49965	16.6771	2.39511	0.220082	3.5072	0.0266314	2.562	0.730499	169.431	4.28427	201.978	6.42379	602.196	51.8313	169.431	4.28427	NA	exclude	off concordia
VT16-11	IESNI001X	mineral	zircon	-VT16-11 Spot 10					1310.32	19580.8	0.778346	13.0792	5.10129	0.285312	5.76123	0.0270762	2.67742	0.46473	172.223	4.55009	254.863	12.9862	1107.08	102.01	172.223	4.55009	NA	exclude	off concordia
VT16-11	IESNI001X	mineral	zircon	-VT16-11 Spot 22					3308.34	101092	1.0665	18.6006	1.54766	0.214823	2.60748	0.0289931	2.0985	0.8048	184.244	3.81162	197.592	4.6819	361.062	34.9171	184.244	3.81162	NA	exclude	off concordia
VT16-11	IESNI001X	mineral	zircon	-VT16-11 Spot 18					4245.02	120897	1.1388	19.1045	1.09003	0.223934	2.38124	0.0310416	2.1171	0.889076	197.064	4.10892	205.178	4.42382	300.469	24.8668	197.064	4.10892	NA	exclude	off concordia
VT16-11	IESNI001X	mineral	zircon	-VT16-11 Spot 31					24.8835	12075.8	0.446152	9.33217	4.34716	0.792116	5.86207	0.0536363	3.93269	0.67087	336.808	12.9056	592.371	26.3148	1751.59	79.6032	336.808	12.9056	NA	exclude	off concordia
VT16-11	IESNI001X	mineral	zircon	-VT16-11 Spot 17					430.616	18688.7	1.12556	20.6302	1.8083	0.171828	2.92548	0.0257209	2.29968	0.786084	163.711	3.71742	161.004	4.35572	122.399	42.601	163.711	3.71742	NA
VT16-11	IESNI001X	mineral	zircon	-VT16-11 Spot 11					1665.15	263675	1.25428	20.4575	1.20275	0.176651	3.18413	0.0262215	2.94823	0.925915	166.856	4.85619	165.175	4.85392	142.151	28.2185	166.856	4.85619	NA
VT16-11	IESNI001X	mineral	zircon	-VT16-11 Spot 27					644.701	73596.5	1.49723	20.3939	1.14798	0.177572	2.74207	0.0262761	2.4902	0.908146	167.2	4.11008	165.969	4.19853	149.453	26.9089	167.2	4.11008	NA
VT16-11	IESNI001X	mineral	zircon	-VT16-11 Spot 13					369.107	12886.3	1.6819	20.783	1.50301	0.174524	3.54428	0.026318	3.20981	0.905632	167.463	5.30602	163.338	5.34756	104.961	35.5218	167.463	5.30602	NA
VT16-11	IESNI001X	mineral	zircon	-VT16-11 Spot 7					1076.87	152689	2.44042	20.1392	1.30624	0.180254	2.54216	0.02634	2.1809	0.857892	167.601	3.6081	168.279	3.94226	178.824	30.451	167.601	3.6081	NA
VT16-11	IESNI001X	mineral	zircon	-VT16-11 Spot 15					349.521	13213.2	1.85303	20.3349	1.92815	0.1792	3.50134	0.0264404	2.9226	0.83471	168.231	4.85314	167.372	5.40279	156.232	45.1339	168.231	4.85314	NA
VT16-11	IESNI001X	mineral	zircon	-VT16-11 Spot 3					692.531	147817	1.52604	20.4045	1.32922	0.179845	2.97072	0.0266263	2.65675	0.894314	169.399	4.4419	167.927	4.59797	148.272	31.1457	169.399	4.4419	NA
VT16-11	IESNI001X	mineral	zircon	-VT16-11 Spot 28					799.52	93218.9	1.1447	20.5511	1.2244	0.178985	2.95209	0.0266895	2.6862	0.909932	169.796	4.50151	167.187	4.55062	131.444	28.8012	169.796	4.50151	NA
VT16-11	IESNI001X	mineral	zircon	-VT16-11 Spot 12					407.682	579966	1.41267	20.2823	1.46306	0.181412	2.91407	0.0266975	2.52016	0.864827	169.846	4.2245	169.275	4.54357	162.322	34.2128	169.846	4.2245	NA
VT16-11	IESNI001X	mineral	zircon	-VT16-11 Spot 1					871.625	198816	1.53764	20.2069	1.18922	0.182411	3.6023	0.0267448	3.40034	0.943937	170.143	5.70976	170.133	5.64283	170.992	27.7744	170.143	5.70976	NA
VT16-11	IESNI001X	mineral	zircon	-VT16-11 Spot 34					1843.34	281037	2.08227	20.3198	1.1266	0.18155	2.89634	0.0267671	2.66825	0.921249	170.283	4.4841	169.393	4.51883	158.008	26.3526	170.283	4.4841	NA
VT16-11	IESNI001X	mineral	zircon	-VT16-11 Spot 35					999.122	75280.8	0.9734	20.3606	1.23972	0.181546	3.1046	0.0268204	2.84634	0.916812	170.618	4.79265	169.39	4.84369	153.316	29.0381	170.618	4.79265	NA
VT16-11	IESNI001X	mineral	zircon	-VT16-11 Spot 19					304.415	100201	1.29988	20.2918	1.47969	0.18284	3.11354	0.0269203	2.73946	0.879854	171.245	4.62942	170.502	4.88691	161.241	34.6087	171.245	4.62942	NA
VT16-11	IESNI001X	mineral	zircon	-VT16-11 Spot 14					2133.62	210392	1.73914	20.3488	0.962852	0.18438	2.41611	0.0272233	2.21597	0.917163	173.146	3.7858	171.822	3.81919	154.674	22.5299	173.146	3.7858	NA
VT16-11	IESNI001X	mineral	zircon	-VT16-11 Spot 8					483.12	57267.2	1.55829	20.5552	1.49421	0.183798	2.44664	0.0274127	1.93736	0.791847	174.335	3.33224	171.324	3.85714	130.949	35.1385	174.335	3.33224	NA
VT16-11	IESNI001X	mineral	zircon	-VT16-11 Spot 9					2207.73	281240	2.36002	20.2296	1.11682	0.187489	2.53032	0.0275202	2.27051	0.897323	175.009	3.92016	174.484	4.05652	168.37	26.0923	175.009	3.92016	NA
VT16-11	IESNI001X	mineral	zircon	-VT16-11 Spot 5					2244.63	612394	1.42448	19.9531	1.39249	0.191482	2.8462	0.0277221	2.4823	0.872145	176.276	4.31641	177.893	4.6445	200.473	32.3359	176.276	4.31641	NA
VT16-11	IESNI001X	mineral	zircon	-VT16-11 Spot 6					2404.49	541825	1.98447	20.0373	1.31736	0.191057	2.53566	0.0277773	2.1666	0.85445	176.622	3.77474	177.53	4.13003	190.683	30.6352	176.622	3.77474	NA
VT16-11	IESNI001X	mineral	zircon	-VT16-11 Spot 2					2989.73	477421	2.07022	19.5419	1.02709	0.198849	2.21987	0.0281954	1.96797	0.886524	179.244	3.47887	184.152	3.73868	248.591	23.6363	179.244	3.47887	NA
VT16-11	IESNI001X	mineral	zircon	-VT16-11 Spot 33					3391.71	1.21886e+06	2.12142	20.2083	1.17351	0.201911	2.48251	0.0296058	2.18763	0.881216	188.08	4.05505	186.742	4.23457	170.836	27.382	188.08	4.05505	NA	exclude	inheritance
VT16-11	IESNI001X	mineral	zircon	-VT16-11 Spot 30					274.867	241315	0.950488	19.891	1.66887	0.206133	2.62324	0.0297505	2.02393	0.771536	188.986	3.76942	190.303	4.55223	207.673	38.7041	188.986	3.76942	NA	exclude	inheritance
VT16-11	IESNI001X	mineral	zircon	-VT16-11 Spot 16					3981.14	158480	1.22795	19.6915	1.09929	0.208332	2.4302	0.0297662	2.16736	0.891844	189.085	4.03864	192.152	4.25447	230.984	25.4078	189.085	4.03864	NA	exclude	inheritance
VT16-11	IESNI001X	mineral	zircon	-VT16-11 Spot 4					4966.99	241032	1.03788	19.5616	0.840958	0.2446	1.93546	0.0347175	1.74321	0.900672	220.006	3.77048	222.18	3.86228	246.277	19.362	220.006	3.77048	NA	exclude	inheritance
NR16-1	IESNI001Y	mineral	zircon	Run1-Sample NR16-1Spot 26					1618	14771	3.1	20.2151	0.5	0.2276	1.1	0.0334	0.9	0.88	211.7	2	208.2	2	169	11.6	211.7	2	NA	exclude	off concordia
NR16-1	IESNI001Y	mineral	zircon	Run1-Sample NR16-1Spot 25					679	5406	4.5	20.7521	0.7	0.2246	1.2	0.0338	1	0.82	214.4	2	205.7	2.2	107.5	15.5	214.4	2	NA	exclude	off concordia
NR16-1	IESNI001Y	mineral	zircon	Run1-Sample NR16-1Spot 3					685	37939	3.8	19.4166	0.7	0.2408	1.2	0.0339	1	0.82	215.1	2.2	219.1	2.5	262.4	16.6	215.1	2.2	NA	exclude	off concordia
NR16-1	IESNI001Y	mineral	zircon	Run1-Sample NR16-1Spot 12					728	10439	3.6	17.9485	1	0.291	2.1	0.0379	1.9	0.88	239.8	4.5	259.4	4.9	440	22.5	239.8	4.5	NA	exclude	off concordia
NR16-1	IESNI001Y	mineral	zircon	Run1-Sample NR16-1Spot 30					540	12916	3.9	21.0933	1	0.0983	1.5	0.015	1.2	0.75	96.3	1.1	95.2	1.4	68.8	24.1	96.3	1.1	NA	exclude	isolated young age
NR16-1	IESNI001Y	mineral	zircon	Run1-Sample NR16-1Spot 4					1194	14930	2.7	20.0215	0.7	0.2129	1.5	0.0309	1.3	0.89	196.4	2.5	196	2.6	191.5	15.7	196.4	2.5	NA	exclude	isolated young age
NR16-1	IESNI001Y	mineral	zircon	Run1-Sample NR16-1Spot 14					1509	57096	3.1	19.5618	0.7	0.2321	1.1	0.033	0.8	0.78	209	1.7	212	2.1	245.2	15.7	209	1.7	NA
NR16-1	IESNI001Y	mineral	zircon	Run1-Sample NR16-1Spot 5					1439	16406	3.5	20.0414	0.6	0.2275	1.2	0.0331	1.1	0.85	209.8	2.2	208.1	2.3	189.2	15	209.8	2.2	NA
NR16-1	IESNI001Y	mineral	zircon	Run1-Sample NR16-1Spot 7					1496	17192	2.5	19.6229	0.6	0.2329	1.2	0.0332	1	0.86	210.3	2.1	212.6	2.2	238.1	13.8	210.3	2.1	NA
NR16-1	IESNI001Y	mineral	zircon	Run1-Sample NR16-1Spot 1					1190	20208	2.9	19.544	0.8	0.2341	1.2	0.0332	0.9	0.74	210.6	1.8	213.6	2.3	247.3	18.6	210.6	1.8	NA
NR16-1	IESNI001Y	mineral	zircon	Run1-Sample NR16-1Spot 2					1047	49696	3.2	19.6649	0.7	0.2329	1.2	0.0332	1	0.85	210.7	2.1	212.6	2.3	233.1	15.1	210.7	2.1	NA
NR16-1	IESNI001Y	mineral	zircon	Run1-Sample NR16-1Spot 10					1455	57035	3.4	19.7491	0.6	0.2327	1.1	0.0333	0.9	0.83	211.4	1.9	212.4	2.2	223.3	14.6	211.4	1.9	NA
NR16-1	IESNI001Y	mineral	zircon	Run1-Sample NR16-1Spot 28					1156	15195	3	20.1627	0.7	0.2285	1.4	0.0334	1.2	0.86	212	2.6	209	2.7	175.1	17.2	212	2.6	NA
NR16-1	IESNI001Y	mineral	zircon	Run1-Sample NR16-1Spot 27					1222	48407	3.5	19.9038	0.9	0.2325	1.3	0.0336	1	0.74	212.9	2	212.3	2.5	205.2	20.3	212.9	2	NA
NR16-1	IESNI001Y	mineral	zircon	Run1-Sample NR16-1Spot 18					910	17051	3.3	20.0671	0.7	0.2308	1.3	0.0336	1	0.82	213.1	2.2	210.8	2.4	186.2	17.1	213.1	2.2	NA
NR16-1	IESNI001Y	mineral	zircon	Run1-Sample NR16-1Spot 24					1142	22763	3.3	19.7037	0.6	0.2352	1.2	0.0336	1	0.86	213.2	2.1	214.5	2.2	228.6	13.8	213.2	2.1	NA
NR16-1	IESNI001Y	mineral	zircon	Run1-Sample NR16-1Spot 21					948	19012	3.9	19.8814	0.7	0.2331	1.4	0.0336	1.2	0.88	213.2	2.6	212.8	2.7	207.8	15.2	213.2	2.6	NA
NR16-1	IESNI001Y	mineral	zircon	Run1-Sample NR16-1Spot 16					568	8064	2.6	20.1256	0.6	0.231	1	0.0337	0.8	0.81	213.8	1.7	211	1.9	179.4	13.5	213.8	1.7	NA
NR16-1	IESNI001Y	mineral	zircon	Run1-Sample NR16-1Spot 20					158	11976	3.7	19.956	1.4	0.2332	1.7	0.0338	1	0.57	214	2	212.8	3.3	199.1	32.4	214	2	NA
NR16-1	IESNI001Y	mineral	zircon	Run1-Sample NR16-1Spot 22					703	16736	3.6	19.9079	0.8	0.2343	1.3	0.0338	1	0.79	214.5	2.1	213.7	2.4	204.7	18.2	214.5	2.1	NA
NR16-1	IESNI001Y	mineral	zircon	Run1-Sample NR16-1Spot 15					961	10014	2.5	20.2469	0.8	0.2307	1.3	0.0339	1	0.79	214.8	2.2	210.7	2.5	165.4	19	214.8	2.2	NA
NR16-1	IESNI001Y	mineral	zircon	Run1-Sample NR16-1Spot 11					1324	72405	3.6	19.7717	0.6	0.2368	1.1	0.034	0.9	0.83	215.4	1.9	215.8	2.1	220.6	13.8	215.4	1.9	NA
NR16-1	IESNI001Y	mineral	zircon	Run1-Sample NR16-1Spot 8					880	18274	3.7	19.8268	0.8	0.2366	1.3	0.034	1	0.8	215.7	2.2	215.6	2.5	214.2	17.7	215.7	2.2	NA
NR16-1	IESNI001Y	mineral	zircon	Run1-Sample NR16-1Spot 23					1074	18053	4.4	20.0386	0.7	0.2342	1.3	0.0341	1	0.81	215.9	2.2	213.7	2.4	189.5	17.3	215.9	2.2	NA
NR16-1	IESNI001Y	mineral	zircon	Run1-Sample NR16-1Spot 19					717	10200	2.8	20.0681	0.7	0.2344	1.2	0.0341	1	0.81	216.3	2.1	213.8	2.4	186.1	17.2	216.3	2.1	NA
NR16-1	IESNI001Y	mineral	zircon	Run1-Sample NR16-1Spot 9					915	62085	3.1	19.6379	0.8	0.2404	1.3	0.0343	1.1	0.8	217.1	2.3	218.8	2.7	236.3	18.6	217.1	2.3	NA
NR16-1	IESNI001Y	mineral	zircon	Run1-Sample NR16-1Spot 29					770	65880	3.5	19.5747	0.6	0.244	1.2	0.0346	1	0.87	219.6	2.2	221.7	2.3	243.7	13.2	219.6	2.2	NA
NR16-1	IESNI001Y	mineral	zircon	Run1-Sample NR16-1Spot 6					1530	24747	2.5	19.8784	0.6	0.2418	1	0.0349	0.8	0.82	221	1.8	219.9	2	208.2	13.3	221	1.8	NA		older age
NR16-1	IESNI001Y	mineral	zircon	Run1-Sample NR16-1Spot 17					958	17188	2.8	19.9656	0.7	0.2412	1.1	0.0349	0.9	0.79	221.4	1.9	219.4	2.1	198	15.2	221.4	1.9	NA		older age
NR15-193	IESNI001Z	mineral	zircon	NR15-193 Spot 60-C2					632.549	24396.2	1.44494	19.2448	0.859166	0.230403	1.83558	0.0321588	1.62209	0.883695	204.045	3.25796	210.531	3.49015	283.765	19.6295	204.045	3.25796	NA	exclude	off concordia
NR15-193	IESNI001Z	mineral	zircon	NR15-193 Spot 49					1465.66	128333	2.38701	19.0047	1.0131	0.237831	1.89388	0.0327815	1.60012	0.844894	207.933	3.2741	216.643	3.6948	312.408	23.0551	207.933	3.2741	NA	exclude	off concordia
NR15-193	IESNI001Z	mineral	zircon	NR15-193 Spot 42					657.407	42851.6	3.89385	19.5406	0.516454	0.232212	1.65414	0.0329095	1.57145	0.95001	208.732	3.22758	212.023	3.16521	248.74	11.9061	208.732	3.22758	NA	exclude	off concordia
NR15-193	IESNI001Z	mineral	zircon	NR15-193 Spot 54					764.116	33077.2	2.6311	18.9923	1.00198	0.244009	1.88794	0.033611	1.60011	0.847542	213.109	3.35423	221.698	3.76013	313.88	22.8075	213.109	3.35423	NA	exclude	off concordia
NR15-193	IESNI001Z	mineral	zircon	NR15-193 Spot 58					501.942	27859.2	2.73072	20.2647	0.760543	0.232392	1.99826	0.0341555	1.84786	0.924738	216.504	3.93426	212.172	3.8261	164.328	17.7552	216.504	3.93426	NA	exclude	off concordia
NR15-193	IESNI001Z	mineral	zircon	NR15-193 Spot 64-C4					1258.78	1892.96	1.63244	11.7999	8.44913	0.413131	9.67816	0.0353561	4.72007	0.487703	223.983	10.3906	351.128	28.7372	1309.73	164.253	223.983	10.3906	NA	exclude	off concordia
NR15-193	IESNI001Z	mineral	zircon	NR15-193 Spot 57					534.02	15290.6	3.06278	20.1747	0.7184	0.241722	1.66406	0.0353689	1.501	0.90201	224.063	3.30541	219.829	3.28921	174.717	16.7703	224.063	3.30541	NA	exclude	off concordia
NR15-193	IESNI001Z	mineral	zircon	NR15-193 Spot 55					845.121	120013	2.28081	18.0292	1.07526	0.299643	2.75312	0.0391813	2.53446	0.920578	247.756	6.16016	266.121	6.44527	431.02	23.9699	247.756	6.16016	NA	exclude	off concordia
NR15-193	IESNI001Z	mineral	zircon	NR15-193 Spot 56					253.623	5498.95	0.611063	20.8251	2.1394	0.069551	2.97263	0.0105048	2.06386	0.694287	67.3652	1.38308	68.2733	1.96279	100.215	50.5952	67.3652	1.38308	NA	exclude	contamination
NR15-193	IESNI001Z	mineral	zircon	NR15-193 Spot 48					663.358	56115.5	2.68312	19.7193	0.796293	0.231573	1.72588	0.0331191	1.5312	0.887201	210.04	3.16431	211.497	3.29511	227.75	18.3929	210.04	3.16431	NA
NR15-193	IESNI001Z	mineral	zircon	NR15-193 Spot 41					1234.24	75332.4	2.46274	19.935	0.516794	0.230175	1.76946	0.0332792	1.69231	0.956399	211.039	3.51362	210.343	3.36174	202.553	11.9953	211.039	3.51362	NA
NR15-193	IESNI001Z	mineral	zircon	NR15-193 Spot 52					581.375	160762	2.58649	19.8374	0.722285	0.23196	1.82612	0.0333731	1.6772	0.918453	211.625	3.49175	211.815	3.49122	213.953	16.7095	211.625	3.49175	NA
NR15-193	IESNI001Z	mineral	zircon	NR15-193 Spot 50					396.757	16103.3	2.06072	20.151	0.964213	0.228919	2.45762	0.0334564	2.26058	0.919822	212.144	4.71763	209.306	4.64844	177.456	22.4618	212.144	4.71763	NA
NR15-193	IESNI001Z	mineral	zircon	NR15-193 Spot 38					189.64	13088.8	3.33395	20.3173	1.51753	0.227399	2.60294	0.0335082	2.1148	0.812467	212.468	4.42003	208.049	4.89665	158.266	35.536	212.468	4.42003	NA
NR15-193	IESNI001Z	mineral	zircon	NR15-193 Spot 66-C3					1179.06	29185.3	1.82432	19.8072	0.538592	0.23335	1.59605	0.033522	1.50243	0.941342	212.554	3.14139	212.96	3.06619	217.458	12.4507	212.554	3.14139	NA
NR15-193	IESNI001Z	mineral	zircon	NR15-193 Spot 70-C1					878.081	81280.7	3.32459	19.9691	0.631531	0.231937	1.81227	0.0335913	1.69868	0.937318	212.986	3.55884	211.797	3.46448	198.568	14.6703	212.986	3.55884	NA
NR15-193	IESNI001Z	mineral	zircon	NR15-193 Spot 40					1147.2	76060.5	2.29935	19.8674	0.601283	0.23371	1.53936	0.0336757	1.41707	0.920558	213.512	2.97605	213.257	2.96098	210.436	13.9294	213.512	2.97605	NA
NR15-193	IESNI001Z	mineral	zircon	NR15-193 Spot 46					943.751	1.2717e+07	2.89404	19.8064	0.683589	0.234788	1.53883	0.0337272	1.37866	0.895915	213.834	2.89969	214.144	2.97103	217.567	15.832	213.834	2.89969	NA
NR15-193	IESNI001Z	mineral	zircon	NR15-193 Spot 51-R2					1072.71	1.27881e+06	2.03696	19.599	0.634099	0.237413	1.84791	0.0337472	1.73571	0.939283	213.958	3.65273	216.3	3.6	241.858	14.6344	213.958	3.65273	NA
NR15-193	IESNI001Z	mineral	zircon	NR15-193 Spot 63					946.317	474720	3.27296	19.7874	0.51393	0.235688	1.43067	0.033824	1.33518	0.933252	214.437	2.81602	214.883	2.77077	219.761	11.8722	214.437	2.81602	NA
NR15-193	IESNI001Z	mineral	zircon	NR15-193 Spot 43					750.277	486033	3.37423	19.8764	0.661284	0.234963	1.66966	0.0338716	1.53312	0.918225	214.734	3.2379	214.288	3.22555	209.394	15.3077	214.734	3.2379	NA
NR15-193	IESNI001Z	mineral	zircon	NR15-193 Spot 68					737.661	37150.1	3.93315	20.1273	0.673866	0.232564	1.91511	0.0339491	1.79264	0.93605	215.217	3.79438	212.314	3.66911	180.202	15.7283	215.217	3.79438	NA
NR15-193	IESNI001Z	mineral	zircon	NR15-193 Spot 39					895.8	20255.7	2.32213	19.9355	0.680552	0.234832	1.9824	0.0339535	1.86192	0.939227	215.245	3.94152	214.18	3.82801	202.495	15.8097	215.245	3.94152	NA
NR15-193	IESNI001Z	mineral	zircon	NR15-193 Spot 67-R4					1175.92	690688	2.47835	19.8041	0.428783	0.236431	1.19738	0.0339591	1.11797	0.933682	215.28	2.36701	215.493	2.32485	217.807	9.91753	215.28	2.36701	NA
NR15-193	IESNI001Z	mineral	zircon	NR15-193 Spot 61					1909.05	53878.6	2.12063	19.6204	0.578985	0.239375	1.43946	0.0340632	1.31789	0.915542	215.928	2.79856	217.909	2.82298	239.377	13.3606	215.928	2.79856	NA
NR15-193	IESNI001Z	mineral	zircon	NR15-193 Spot 62					970.769	811712	2.40934	19.9192	0.620647	0.235987	1.6207	0.0340924	1.49715	0.923769	216.111	3.18188	215.129	3.14202	204.422	14.3801	216.111	3.18188	NA
NR15-193	IESNI001Z	mineral	zircon	NR15-193 Spot 47					1006.37	44275.5	1.99019	19.703	0.595295	0.238783	1.5439	0.0341219	1.42452	0.922676	216.294	3.03005	217.423	3.02176	229.64	13.7689	216.294	3.03005	NA
NR15-193	IESNI001Z	mineral	zircon	NR15-193 Spot 59					1973.42	65463.6	2.28097	20.0459	0.618038	0.235126	1.9868	0.0341841	1.88822	0.950386	216.682	4.02345	214.421	3.84038	189.638	14.3795	216.682	4.02345	NA
NR15-193	IESNI001Z	mineral	zircon	NR15-193 Spot 69					722.032	39332	3.65996	19.6393	0.605442	0.240499	1.50047	0.0342561	1.3729	0.914979	217.131	2.93134	218.829	2.95375	237.125	13.9624	217.131	2.93134	NA
NR15-193	IESNI001Z	mineral	zircon	NR15-193 Spot 53					483.949	32964.4	3.61592	19.7846	0.823012	0.240733	1.65197	0.0345431	1.43236	0.867062	218.92	3.08307	219.021	3.25455	220.086	19.0582	218.92	3.08307	NA
NR15-193	IESNI001Z	mineral	zircon	NR15-193 Spot 36					655.093	27231.2	2.5866	19.5852	1.05457	0.244142	1.69935	0.0346792	1.33254	0.784149	219.767	2.87914	221.806	3.38599	243.511	24.2977	219.767	2.87914	NA
NR15-193	IESNI001Z	mineral	zircon	NR15-193 Spot 65-R3					712.854	15029.3	2.87551	19.994	0.652431	0.23991	1.49283	0.0347893	1.34272	0.899441	220.454	2.91003	218.347	2.93292	195.714	15.1762	220.454	2.91003	NA
NR15-193	IESNI001Z	mineral	zircon	NR15-193 Spot 44					1117.83	31168.3	2.60516	19.8951	0.686778	0.241524	1.75535	0.0348501	1.61542	0.920285	220.832	3.50695	219.668	3.46737	207.214	15.913	220.832	3.50695	NA
NR15-193	IESNI001Z	mineral	zircon	NR15-193 Spot 37					497.911	46265.4	2.89821	20.0071	0.795515	0.244153	1.91988	0.0354277	1.74732	0.910115	224.429	3.85401	221.815	3.82556	194.196	18.4937	224.429	3.85401	NA
NR15-193	IESNI001Z	mineral	zircon	NR15-193 Spot 45-R1					1101.63	27832.6	2.07397	19.6193	0.665685	0.24905	1.57397	0.035438	1.42627	0.906161	224.493	3.14678	225.804	3.18666	239.481	15.3632	224.493	3.14678	NA
3-93	IESNI0026	mineral	zircon	3-93-6					631.088	8889.97	3.52751	21.0497	6.39017	0.197574	7.86174	0.030163	4.57958	0.582515	191.569	8.64397	183.072	13.1705	74.7806	151.982	191.569	8.64397	NA	exclude	isolated young age
3-93	IESNI0026	mineral	zircon	3-93-2					890.895	9252.57	1.41073	20.3506	1.34099	0.225057	1.77226	0.0332175	1.15873	0.653813	210.654	2.40147	206.11	3.30595	154.432	31.4041	210.654	2.40147	NA		young age cluster
3-93	IESNI0026	mineral	zircon	3-93-20					931.502	16103.5	2.91455	20.1648	1.58876	0.228192	2.2619	0.0333728	1.60997	0.711779	211.623	3.35175	208.705	4.26716	175.863	37.0374	211.623	3.35175	NA		young age cluster
3-93	IESNI0026	mineral	zircon	3-93-19					486.081	6342.98	3.48247	20.9019	3.0957	0.221072	3.55866	0.0335133	1.75518	0.493215	212.5	3.66895	202.802	6.54206	91.4713	73.3375	212.5	3.66895	NA		young age cluster
3-93	IESNI0026	mineral	zircon	3-93-7					789.624	13678.9	3.71259	19.5746	1.45602	0.237852	2.74413	0.0337675	2.32599	0.847626	214.085	4.89782	216.66	5.35398	244.72	33.5501	214.085	4.89782	NA		young age cluster
3-93	IESNI0026	mineral	zircon	3-93-3					990.777	13991.1	2.32805	20.1292	2.33659	0.231739	7.15067	0.0338318	6.75813	0.945106	214.485	14.2567	211.633	13.661	179.981	54.4898	214.485	14.2567	NA		young age cluster
3-93	IESNI0026	mineral	zircon	3-93-17					894.03	10119.7	1.4688	20.3654	1.71957	0.23631	2.18475	0.0349038	1.34767	0.616854	221.167	2.93006	215.394	4.24023	152.745	40.3061	221.167	2.93006	NA
3-93	IESNI0026	mineral	zircon	3-93-10					540.042	9873.28	2.55417	19.8127	2.29014	0.243358	2.56818	0.0349693	1.16223	0.452552	221.575	2.53146	221.166	5.10397	216.844	53.0259	221.575	2.53146	NA
3-93	IESNI0026	mineral	zircon	3-93-12					615.428	7357.4	1.18392	20.2627	2.46467	0.238697	3.12751	0.0350787	1.92529	0.615596	222.256	4.20614	217.353	6.1195	164.55	57.6035	222.256	4.20614	NA
3-93	IESNI0026	mineral	zircon	3-93-1					753.41	6734.77	2.6624	19.7296	4.46283	0.24549	4.84417	0.0351277	1.88393	0.388907	222.561	4.12135	222.906	9.69518	226.526	103.205	222.561	4.12135	NA
3-93	IESNI0026	mineral	zircon	3-93-9					1148.46	18232.5	2.73305	19.5907	1.94504	0.24893	2.03696	0.0353693	0.605027	0.297024	224.066	1.33237	225.706	4.12244	242.819	44.8324	224.066	1.33237	NA
3-93	IESNI0026	mineral	zircon	3-93-8					677.335	6830.73	1.92412	19.4931	8.34789	0.25027	9.03435	0.0353825	3.45429	0.382351	224.148	7.60965	226.795	18.3645	254.356	192.246	224.148	7.60965	NA
3-93	IESNI0026	mineral	zircon	3-93-24					359.963	5086.77	2.13498	21.2294	4.23477	0.230912	5.04172	0.0355536	2.736	0.542671	225.213	6.05542	210.952	9.60377	54.5147	101.068	225.213	6.05542	NA
3-93	IESNI0026	mineral	zircon	3-93-18					1061.23	13432.6	2.05642	20.23	1.37722	0.242385	2.14453	0.0355631	1.64386	0.766537	225.272	3.6392	220.372	4.24828	168.334	32.17	225.272	3.6392	NA
3-93	IESNI0026	mineral	zircon	3-93-14					1258.07	19939.1	1.40512	19.6963	1.33489	0.250579	1.87467	0.0357956	1.31624	0.702114	226.719	2.93229	227.047	3.8141	230.419	30.8243	226.719	2.93229	NA
3-93	IESNI0026	mineral	zircon	3-93-23					1391.31	15337.2	1.38165	19.8314	1.12207	0.250426	2.09075	0.0360189	1.76414	0.843784	228.109	3.9538	226.922	4.25163	214.662	26.0018	228.109	3.9538	NA
3-93	IESNI0026	mineral	zircon	3-93-22					837.415	15619.1	2.73828	20.0101	1.92329	0.24939	2.06017	0.0361932	0.738415	0.358425	229.193	1.66266	226.08	4.17557	193.838	44.7187	229.193	1.66266	NA
3-93	IESNI0026	mineral	zircon	3-93-4					784.052	10774.8	2.13583	19.9089	2.08598	0.250848	2.42317	0.0362207	1.23308	0.508868	229.364	2.77851	227.265	4.93429	205.617	48.3946	229.364	2.77851	NA
3-93	IESNI0026	mineral	zircon	3-93-25					912.583	13385.1	2.33574	20.0395	2.42261	0.250241	2.55767	0.0363701	0.820153	0.320664	230.294	1.85542	226.772	5.19808	190.424	56.3633	230.294	1.85542	NA
3-93	IESNI0026	mineral	zircon	3-93-21					1197.97	18424.9	1.37236	20.2003	1.88226	0.248399	2.45032	0.0363921	1.56882	0.640248	230.431	3.55119	225.275	4.95055	171.755	43.9184	230.431	3.55119	NA
3-93	IESNI0026	mineral	zircon	3-93-16					795.394	11254.2	2.03839	20.3881	1.71481	0.246296	2.24644	0.0364194	1.45118	0.64599	230.6	3.28728	223.563	4.50781	150.141	40.1909	230.6	3.28728	NA
3-93	IESNI0026	mineral	zircon	3-93-13					1016.31	15323.8	1.67041	19.8777	1.68046	0.256106	2.65888	0.036922	2.06051	0.774955	233.726	4.7297	231.524	5.50462	209.207	38.9616	233.726	4.7297	NA
3-93	IESNI0026	mineral	zircon	3-93-15					724.94	15284.4	1.57137	20.141	1.49868	0.252782	1.58722	0.0369253	0.52272	0.32933	233.747	1.19995	228.833	3.25191	178.62	34.9642	233.747	1.19995	NA
3-93	IESNI0026	mineral	zircon	3-93-5					1139.98	16342.5	1.98537	19.9908	1.88213	0.255471	2.32474	0.0370399	1.36455	0.586969	234.459	3.14183	231.011	4.80333	196.086	43.7361	234.459	3.14183	NA
3-93	IESNI0026	mineral	zircon	3-93-11					1430.9	12958.7	1.60512	19.9399	1.15872	0.258118	1.5162	0.0373284	0.977869	0.644946	236.252	2.26841	233.149	3.15853	201.964	26.8998	236.252	2.26841	NA
VT16-3-a	IESNI0024	mineral	zircon	-VT16-3-a Spot 21					2226	9053.34	0.630195	12.458	5.78696	0.268836	9.13653	0.0243009	7.07017	0.773835	154.781	10.8129	241.763	19.6584	1203.61	114.115	154.781	10.8129	NA	exclude	off concordia
VT16-3-a	IESNI0024	mineral	zircon	-VT16-3-a Spot 34					2837.43	12961.3	1.42074	13.5621	4.77709	0.309322	5.48551	0.0304386	2.69632	0.491535	193.292	5.13442	273.655	13.1594	1034.21	96.5661	193.292	5.13442	NA	exclude	off concordia
VT16-3-a	IESNI0024	mineral	zircon	-VT16-3-a Spot 13					1916.69	21234.2	1.5855	15.907	1.91449	0.290232	3.38948	0.0334981	2.79701	0.825205	212.404	5.84417	258.742	7.74191	703.675	40.7473	212.404	5.84417	NA	exclude	off concordia
VT16-3-a	IESNI0024	mineral	zircon	-VT16-3-a Spot 12					1154.78	43863.4	2.29452	18.1265	1.4227	0.256068	3.11375	0.0336788	2.76972	0.889514	213.532	5.81736	231.493	6.44557	419.008	31.7728	213.532	5.81736	NA	exclude	off concordia
VT16-3-a	IESNI0024	mineral	zircon	-VT16-3-a Spot 3					133.348	8004.36	1.77955	16.6378	2.35576	0.279983	3.8023	0.0337997	2.98461	0.784948	214.286	6.29047	250.644	8.44526	607.309	50.9347	214.286	6.29047	NA	exclude	off concordia
VT16-3-a	IESNI0024	mineral	zircon	-VT16-3-a Spot 5					188.05	152453	3.39872	10.325	1.10628	3.04904	3.44052	0.228424	3.25781	0.946894	1326.23	39.0519	1419.99	26.3125	1564.34	20.7392	1564.34	20.7392	84.779	exclude	inheritance
VT16-3-a	IESNI0024	mineral	zircon	-VT16-3-a Spot 35					55.9259	707580	2.42921	5.92211	1.32727	11.2142	3.29433	0.481874	3.01512	0.915246	2535.43	63.2062	2541.1	30.7208	2546.35	22.2408	2546.35	22.2408	99.5709	exclude	inheritance
VT16-3-a	IESNI0024	mineral	zircon	-VT16-3-a Spot 29					526.265	337141	2.00182	19.4962	1.39945	0.233782	3.46017	0.0330711	3.16454	0.914562	209.741	6.5305	213.316	6.65742	253.968	32.182	209.741	6.5305	NA
VT16-3-a	IESNI0024	mineral	zircon	-VT16-3-a Spot 20					665.726	72651.1	1.56145	19.5271	1.33002	0.233648	3.64931	0.0331045	3.3983	0.93122	209.949	7.01978	213.206	7.01807	250.316	30.6163	209.949	7.01978	NA
VT16-3-a	IESNI0024	mineral	zircon	-VT16-3-a Spot 14					265.291	48020.7	1.85248	19.9168	1.17209	0.23913	3.37134	0.0345574	3.16104	0.93762	219.009	6.80667	217.708	6.60627	204.697	27.1965	219.009	6.80667	NA
VT16-3-a	IESNI0024	mineral	zircon	-VT16-3-a Spot 15					1532.5	691589	3.88818	20.1542	1.24191	0.237809	3.17681	0.0347761	2.924	0.920421	220.371	6.33477	216.625	6.19729	177.093	28.9574	220.371	6.33477	NA
VT16-3-a	IESNI0024	mineral	zircon	-VT16-3-a Spot 27					1005.94	107775	3.34192	19.9601	1.39946	0.242193	3.07746	0.0350762	2.74086	0.890622	222.24	5.98749	220.215	6.09257	199.635	32.5023	222.24	5.98749	NA
VT16-3-a	IESNI0024	mineral	zircon	-VT16-3-a Spot 28					550.726	79764.6	1.42283	19.947	1.14927	0.242943	3.35677	0.0351617	3.1539	0.939564	222.773	6.90604	220.828	6.6621	201.179	26.6957	222.773	6.90604	NA
VT16-3-a	IESNI0024	mineral	zircon	-VT16-3-a Spot 19					847.903	586951	4.98215	20.1625	1.57113	0.241557	3.28081	0.0353388	2.88015	0.877878	223.876	6.33729	219.694	6.48142	176.124	36.627	223.876	6.33729	NA
VT16-3-a	IESNI0024	mineral	zircon	-VT16-3-a Spot 4					1022.51	155837	2.28355	19.7404	1.52577	0.246802	3.73181	0.0353502	3.40565	0.912599	223.947	7.49589	223.975	7.50081	225.269	35.2709	223.947	7.49589	NA
VT16-3-a	IESNI0024	mineral	zircon	-VT16-3-a Spot 33					424.821	89337.4	1.84956	19.8124	1.82377	0.250095	4.40196	0.0359526	4.00638	0.910137	227.697	8.96318	226.653	8.9423	216.859	42.2479	227.697	8.96318	NA
VT16-3-a	IESNI0024	mineral	zircon	-VT16-3-a Spot 16					1172.33	397105	3.2052	19.424	1.17734	0.255263	3.48658	0.0359761	3.28178	0.941262	227.843	7.34671	230.843	7.1993	262.504	27.0182	227.843	7.34671	NA
VT16-3-a	IESNI0024	mineral	zircon	-VT16-3-a Spot 17					1386.39	491489	4.726	19.6167	1.20617	0.257488	3.16745	0.0366498	2.92881	0.924656	232.033	6.67495	232.64	6.58566	239.788	27.8088	232.033	6.67495	NA
NR15-188	IESNI0021	mineral	zircon	NR15-188 Spot 35-C5					812.944	29484.1	4.48925	18.9877	1.10726	0.241522	2.56672	0.0332604	2.31561	0.902164	210.922	4.80508	219.666	5.07007	314.434	25.2013	210.922	4.80508	NA	exclude	off concordia
NR15-188	IESNI0021	mineral	zircon	NR15-188 Spot 4					846.652	12304.4	3.81418	17.7482	1.41526	0.271101	3.0164	0.0348968	2.66378	0.883098	221.123	5.79035	243.573	6.53245	465.914	31.3618	221.123	5.79035	NA	exclude	off concordia
NR15-188	IESNI0021	mineral	zircon	NR15-188 Spot 6-R4					1159.9	3939.4	3.68715	16.1385	1.54523	0.308821	2.7995	0.0361467	2.3344	0.833865	228.904	5.24977	273.266	6.70721	672.854	33.0338	228.904	5.24977	NA	exclude	off concordia
NR15-188	IESNI0021	mineral	zircon	NR15-188 Spot 33					698.481	1922.48	4.55082	9.83962	5.21279	0.888339	8.65631	0.0633951	6.91076	0.798349	396.24	26.5587	645.476	41.3715	1654.08	96.6563	396.24	26.5587	NA	exclude	off concordia
NR15-188	IESNI0021	mineral	zircon	NR15-188 Spot 31-C4					877.444	18598.7	3.64725	19.9861	1.30627	0.20878	3.13522	0.0302632	2.85013	0.909069	192.196	5.39697	192.529	5.4985	196.635	30.364	192.196	5.39697	NA		isolated young age
NR15-188	IESNI0021	mineral	zircon	NR15-188 Spot 34					1016.3	26523.7	4.59981	19.4182	1.2588	0.221836	3.31134	0.0312421	3.06274	0.924926	198.317	5.98147	203.436	6.1046	263.189	28.889	198.317	5.98147	NA		isolated young age
NR15-188	IESNI0021	mineral	zircon	NR15-188 Spot 17-R3					1073.26	33078.2	3.37039	19.759	1.16056	0.229557	3.69174	0.0328969	3.50457	0.949301	208.654	7.19535	209.833	6.99858	223.118	26.8163	208.654	7.19535	NA
NR15-188	IESNI0021	mineral	zircon	NR15-188 Spot 16-C1					834.757	42492.1	4.33642	19.6143	1.14247	0.235634	3.36524	0.0335203	3.16538	0.94061	212.543	6.6181	214.839	6.51628	240.062	26.3385	212.543	6.6181	NA
NR15-188	IESNI0021	mineral	zircon	NR15-188 Spot 32					1086.59	75397	4.31113	19.7759	1.07492	0.233909	2.75713	0.033549	2.53895	0.92087	212.722	5.31279	213.42	5.30705	221.104	24.8647	212.722	5.31279	NA
NR15-188	IESNI0021	mineral	zircon	NR15-188 Spot 19					966.518	83958.4	3.52693	19.8378	1.0121	0.234497	3.29395	0.0337387	3.13461	0.951626	213.905	6.59507	213.904	6.35331	213.912	23.4223	213.905	6.59507	NA
NR15-188	IESNI0021	mineral	zircon	NR15-188 Spot 15-C2					842.562	49535.9	4.68537	19.5085	1.06153	0.239225	3.17087	0.0338476	2.98791	0.942298	214.584	6.30603	217.785	6.21541	252.551	24.4226	214.584	6.30603	NA
NR15-188	IESNI0021	mineral	zircon	NR15-188 Spot 29					962.56	106989	4.55485	19.6275	1.14674	0.239536	3.02765	0.0340984	2.80208	0.925497	216.148	5.95623	218.04	5.9409	238.518	26.4574	216.148	5.95623	NA
NR15-188	IESNI0021	mineral	zircon	NR15-188 Spot 20-C3					859.45	49117.8	3.82975	19.4161	1.06803	0.242442	3.08069	0.0341404	2.88963	0.937981	216.41	6.14964	220.418	6.104	263.418	24.5316	216.41	6.14964	NA
NR15-188	IESNI0021	mineral	zircon	NR15-188 Spot 27-R2					999.068	552189	4.44621	19.5489	0.960927	0.240927	3.02902	0.0341592	2.87255	0.948345	216.527	6.11654	219.179	5.9714	247.758	22.1012	216.527	6.11654	NA
NR15-188	IESNI0021	mineral	zircon	NR15-188 Spot 11					1027.99	32380.2	3.97894	19.9383	1.04792	0.236962	3.16206	0.0342662	2.98337	0.943489	217.194	6.37175	215.93	6.15074	202.191	24.3474	217.194	6.37175	NA
NR15-188	IESNI0021	mineral	zircon	NR15-188 Spot 13					941.872	73551.9	3.94723	19.8438	1.11377	0.238351	2.81258	0.0343037	2.58265	0.918252	217.428	5.52176	217.07	5.49683	213.165	25.8035	217.428	5.52176	NA
NR15-188	IESNI0021	mineral	zircon	NR15-188 Spot 26					589.007	48548.3	5.03452	19.97	0.971747	0.236926	2.78892	0.0343154	2.61415	0.937334	217.501	5.59094	215.9	5.42424	198.502	22.5735	217.501	5.59094	NA
NR15-188	IESNI0021	mineral	zircon	NR15-188 Spot 10					1130.13	111855	3.37093	19.8029	1.03266	0.2391	2.46963	0.0343405	2.24337	0.908381	217.657	4.80133	217.683	4.83881	217.992	23.891	217.657	4.80133	NA
NR15-188	IESNI0021	mineral	zircon	NR15-188 Spot 18					904.936	39356.7	3.51739	19.6277	1.09127	0.241403	2.98229	0.0343644	2.77546	0.930647	217.806	5.94414	219.568	5.88862	238.506	25.1434	217.806	5.94414	NA
NR15-188	IESNI0021	mineral	zircon	NR15-188 Spot 12-R5					1192.46	226155	3.47447	19.5001	1.16925	0.244067	3.11839	0.034518	2.89088	0.927044	218.763	6.21807	221.746	6.212	253.524	26.9001	218.763	6.21807	NA
NR15-188	IESNI0021	mineral	zircon	NR15-188 Spot 8					1450.69	89975.4	2.65	19.8194	1.20447	0.240196	3.09928	0.0345267	2.85566	0.921395	218.817	6.14382	218.581	6.09497	216.028	27.8969	218.817	6.14382	NA
NR15-188	IESNI0021	mineral	zircon	NR15-188 Spot 1					746.996	464767	2.97262	19.788	0.795168	0.240676	3.15451	0.034541	3.05264	0.967708	218.906	6.57024	218.974	6.21358	219.721	18.3986	218.906	6.57024	NA
NR15-188	IESNI0021	mineral	zircon	NR15-188 Spot 7					699.833	19870.7	4.99576	20.0181	1.36973	0.237954	3.17625	0.0345473	2.86573	0.902237	218.946	6.16905	216.743	6.19924	192.91	31.8519	218.946	6.16905	NA
NR15-188	IESNI0021	mineral	zircon	NR15-188 Spot 25					599.346	23930.3	4.82732	19.8278	1.03612	0.240689	2.57914	0.0346121	2.36187	0.915758	219.35	5.09359	218.984	5.08044	215.05	23.9735	219.35	5.09359	NA
NR15-188	IESNI0021	mineral	zircon	NR15-188 Spot 30					934.509	20681.2	4.31983	19.7399	1.10468	0.242049	3.11446	0.0346535	2.91197	0.934982	219.607	6.2872	220.097	6.16287	225.312	25.5132	219.607	6.2872	NA
NR15-188	IESNI0021	mineral	zircon	NR15-188 Spot 21					682.901	27515.6	4.93212	20.0334	1.23962	0.23935	2.83344	0.0347766	2.54789	0.89922	220.374	5.51999	217.888	5.55633	191.139	28.8464	220.374	5.51999	NA
NR15-188	IESNI0021	mineral	zircon	NR15-188 Spot 9					1804.68	76620.5	2.85971	19.1081	0.998363	0.251212	2.64939	0.0348142	2.45408	0.926283	220.609	5.32233	227.561	5.40119	300.004	22.7688	220.609	5.32233	NA
NR15-188	IESNI0021	mineral	zircon	NR15-188 Spot 24					667.634	18951.1	4.27784	19.7717	0.763037	0.243167	2.71221	0.0348696	2.60267	0.95961	220.954	5.65325	221.011	5.38683	221.595	17.6722	220.954	5.65325	NA
NR15-188	IESNI0021	mineral	zircon	NR15-188 Spot 3					529.756	12079.6	4.77774	20.078	1.53533	0.23967	3.2162	0.0349006	2.82608	0.878701	221.147	6.1438	218.15	6.31373	185.913	35.7698	221.147	6.1438	NA
NR15-188	IESNI0021	mineral	zircon	NR15-188 Spot 28					383.134	22260.3	3.67494	19.6935	1.04607	0.244432	2.81609	0.0349125	2.6146	0.928449	221.221	5.68592	222.043	5.61654	230.746	24.1614	221.221	5.68592	NA
NR15-188	IESNI0021	mineral	zircon	NR15-188 Spot 14					1241.83	82695.7	3.52587	19.2484	1.17275	0.250736	3.2989	0.0350034	3.08341	0.934677	221.787	6.72229	227.174	6.71517	283.341	26.8236	221.787	6.72229	NA
NR15-188	IESNI0021	mineral	zircon	NR15-188 Spot 2					494.849	10471.9	4.22621	20.3053	1.22043	0.237904	3.57925	0.0350356	3.36476	0.940073	221.987	7.34219	216.703	6.98463	159.682	28.5366	221.987	7.34219	NA
NR15-188	IESNI0021	mineral	zircon	NR15-188 Spot 23					740.214	88180	3.62071	19.8338	1.28008	0.243985	3.06135	0.035097	2.78087	0.908381	222.37	6.07837	221.679	6.09672	214.372	29.6617	222.37	6.07837	NA
NR15-188	IESNI0021	mineral	zircon	NR15-188 Spot 22-R1					1167.9	57165.6	3.38147	19.5065	0.961342	0.24935	3.56407	0.0352767	3.43197	0.962936	223.489	7.53865	226.048	7.22285	252.78	22.1123	223.489	7.53865	NA
NR15-188	IESNI0021	mineral	zircon	NR15-188 Spot 5					1149.22	69730	2.61835	20.0001	0.957311	0.245587	2.74743	0.0356235	2.57525	0.937332	225.648	5.71049	222.985	5.50037	195	22.2677	225.648	5.71049	NA
RR16-S-33	IESNI0022	mineral	zircon	RR16-S-33 Spot 51					2727.04	3255.52	1.35911	5.71685	17.361	0.813591	18.1619	0.0337482	5.33395	0.293689	213.965	11.2255	604.466	82.913	2605.28	291.684	213.965	11.2255	NA	exclude	off concordia
RR16-S-33	IESNI0022	mineral	zircon	RR16-S-33 Spot 45					2747.31	55178.3	2.34617	17.2808	2.14846	0.278908	3.24958	0.0349715	2.43801	0.750254	221.588	5.31055	249.791	7.19593	524.731	47.1239	221.588	5.31055	NA	exclude	off concordia
RR16-S-33	IESNI0022	mineral	zircon	RR16-S-33 Spot 61					2296.29	69360.9	2.54176	18.8265	1.32435	0.259431	3.0634	0.0354388	2.76234	0.901724	224.498	6.09466	234.208	6.40747	333.782	30.0121	224.498	6.09466	NA	exclude	off concordia
RR16-S-33	IESNI0022	mineral	zircon	RR16-S-33 Spot 50					3464.22	56239.4	2.37974	16.3002	3.12267	0.312103	3.75512	0.036913	2.08563	0.555409	233.67	4.78621	275.809	9.06974	651.466	67.025	233.67	4.78621	NA	exclude	off concordia
RR16-S-33	IESNI0022	mineral	zircon	RR16-S-33 Spot 37					1013.78	58306.6	3.60384	19.7597	1.38053	0.231662	2.86967	0.0332142	2.51579	0.87668	210.633	5.21345	211.57	5.48062	223.017	31.9179	210.633	5.21345	NA
RR16-S-33	IESNI0022	mineral	zircon	RR16-S-33 Spot 64					1096.82	165868	3.05024	19.4971	1.19083	0.236631	2.34822	0.0334755	2.02388	0.861876	212.264	4.226	215.658	4.5625	253.853	27.3899	212.264	4.226	NA
RR16-S-33	IESNI0022	mineral	zircon	RR16-S-33 Spot 41					1326.19	165139	3.39291	19.504	1.08164	0.236754	2.4396	0.0335051	2.18672	0.896341	212.448	4.56992	215.759	4.74206	253.068	24.8971	212.448	4.56992	NA
RR16-S-33	IESNI0022	mineral	zircon	RR16-S-33 Spot 49					1027.91	102728	2.50576	19.5782	1.39662	0.238317	3.37105	0.0338544	3.06813	0.910142	214.626	6.4766	217.041	6.58754	244.298	32.1959	214.626	6.4766	NA
RR16-S-33	IESNI0022	mineral	zircon	RR16-S-33 Spot 47					1068.19	830849	4.34775	19.9012	1.1168	0.235705	3.65265	0.0340358	3.47773	0.952111	215.758	7.3793	214.897	7.07456	206.469	25.9054	215.758	7.3793	NA
RR16-S-33	IESNI0022	mineral	zircon	RR16-S-33 Spot 43					1621.94	387226	2.7119	19.8986	1.41094	0.237505	3.0382	0.0342912	2.69071	0.885626	217.35	5.75075	216.375	5.92075	206.795	32.7322	217.35	5.75075	NA
RR16-S-33	IESNI0022	mineral	zircon	RR16-S-33 Spot 58					1326.88	123311	4.03172	19.7202	1.39037	0.240444	2.98169	0.0344044	2.63768	0.884625	218.055	5.65539	218.784	5.86859	227.638	32.1049	218.055	5.65539	NA
RR16-S-33	IESNI0022	mineral	zircon	RR16-S-33 Spot 44					1303.6	212920	3.1365	19.6804	1.38039	0.241184	2.84599	0.0344405	2.48882	0.874499	218.28	5.34166	219.389	5.6154	232.285	31.87	218.28	5.34166	NA
RR16-S-33	IESNI0022	mineral	zircon	RR16-S-33 Spot 53					1062.75	188092	3.68481	19.7501	1.21061	0.24121	3.14519	0.0345661	2.90287	0.922955	219.063	6.25228	219.41	6.20629	224.144	27.9903	219.063	6.25228	NA
RR16-S-33	IESNI0022	mineral	zircon	RR16-S-33 Spot 36					2088.8	93697.4	2.97809	19.72	1.18464	0.24174	3.08089	0.0345895	2.84404	0.92312	219.209	6.12957	219.845	6.09018	227.655	27.3576	219.209	6.12957	NA
RR16-S-33	IESNI0022	mineral	zircon	RR16-S-33 Spot 54					1218.14	8.21877e+06	3.60274	19.6447	1.29066	0.243151	2.92344	0.0346584	2.62311	0.897268	219.638	5.66431	220.997	5.80606	236.523	29.7864	219.638	5.66431	NA
RR16-S-33	IESNI0022	mineral	zircon	RR16-S-33 Spot 46					1287.32	159389	4.21576	19.9796	1.03642	0.239345	3.12412	0.0346976	2.94719	0.943368	219.882	6.37107	217.884	6.12624	197.344	24.0804	219.882	6.37107	NA
RR16-S-33	IESNI0022	mineral	zircon	RR16-S-33 Spot 40					1529.98	167334	3.8536	20.035	1.42411	0.238913	2.88559	0.034731	2.50969	0.869731	220.09	5.43035	217.53	5.65025	190.944	33.1291	220.09	5.43035	NA
RR16-S-33	IESNI0022	mineral	zircon	RR16-S-33 Spot 55					1456.59	363854	3.2166	19.3356	1.13792	0.248953	2.39037	0.034927	2.10214	0.879421	221.311	4.57332	225.725	4.83803	272.948	26.057	221.311	4.57332	NA
RR16-S-33	IESNI0022	mineral	zircon	RR16-S-33 Spot 62					1765.38	231021	3.75868	19.5972	1.17114	0.24719	2.94402	0.0351491	2.70105	0.917471	222.694	5.91237	224.291	5.9248	242.09	26.9787	222.694	5.91237	NA
RR16-S-33	IESNI0022	mineral	zircon	RR16-S-33 Spot 56					1869.56	89082	2.23262	19.7555	1.39048	0.24718	2.90492	0.0354315	2.55052	0.877999	224.453	5.6262	224.283	5.84593	223.488	32.1427	224.453	5.6262	NA
RR16-S-33	IESNI0022	mineral	zircon	RR16-S-33 Spot 59					680.984	120745	4.26552	19.4185	1.36144	0.252442	3.58799	0.0355684	3.31966	0.925214	225.305	7.35017	228.558	7.34332	263.17	31.2718	225.305	7.35017	NA
RR16-S-33	IESNI0022	mineral	zircon	RR16-S-33 Spot 48					2149.81	170585	2.79822	19.4167	1.4722	0.253288	3.27082	0.0356842	2.92077	0.892978	226.026	6.4873	229.243	6.71206	263.381	33.8089	226.026	6.4873	NA
RR16-S-33	IESNI0022	mineral	zircon	RR16-S-33 Spot 65					1382.81	267532	3.22965	20.1592	1.09328	0.244198	2.56409	0.0357193	2.31933	0.904544	226.245	5.15634	221.853	5.10998	176.514	25.5134	226.245	5.15634	NA
RR16-S-33	IESNI0022	mineral	zircon	RR16-S-33 Spot 52					2197.65	1.08333e+06	2.62044	19.3093	1.11035	0.255051	2.62891	0.035734	2.38291	0.906427	226.336	5.2998	230.671	5.4247	276.064	25.4474	226.336	5.2998	NA
RR16-S-33	IESNI0022	mineral	zircon	RR16-S-33 Spot 57					1689.02	499858	2.08668	19.4379	1.44737	0.253465	2.925	0.0357483	2.5418	0.868991	226.425	5.65536	229.387	6.00574	260.84	33.246	226.425	5.65536	NA
RR16-S-33	IESNI0022	mineral	zircon	RR16-S-33 Spot 63					1807.03	256907	2.82819	19.4507	1.36717	0.254803	2.67137	0.0359607	2.29501	0.859112	227.747	5.13555	230.47	5.50805	259.346	31.3952	227.747	5.13555	NA
RR16-S-33	IESNI0022	mineral	zircon	RR16-S-33 Spot 39					2634.07	651490	2.30906	19.8802	1.28674	0.250008	3.32377	0.0360629	3.06459	0.922024	228.383	6.87647	226.582	6.75006	208.93	29.8335	228.383	6.87647	NA
RR16-S-33	IESNI0022	mineral	zircon	RR16-S-33 Spot 60					2292.45	239656	2.54501	19.7032	1.22514	0.255615	3.07527	0.0365435	2.82069	0.917219	231.372	6.41057	231.127	6.35694	229.617	28.3036	231.372	6.41057	NA
RR16-S-33	IESNI0022	mineral	zircon	RR16-S-33 Spot 38					2944.43	330313	2.35839	19.3845	1.12777	0.261589	3.12561	0.0367928	2.91506	0.932637	232.922	6.66862	235.947	6.5807	267.173	25.8961	232.922	6.66862	NA
RR16-S-33	IESNI0022	mineral	zircon	RR16-S-33 Spot 42					3534.62	102115	2.39444	18.8182	1.72814	0.278719	3.38091	0.0380567	2.90587	0.859494	240.776	6.86761	249.641	7.48277	334.762	39.1631	240.776	6.86761	NA		isolated older age
A-71	IESNI0023	mineral	zircon	A-71-15					380.751	118613	3.53338	14.4074	2.07496	0.81085	6.17861	0.0847274	5.81978	0.941923	524.278	29.3043	602.931	28.0989	910.9	42.7412	524.278	29.3043	NA	exclude	off concordia
A-71	IESNI0023	mineral	zircon	A-71-14					384.363	14364.5	1.03998	21.143	9.89532	0.125933	10.2977	0.0193111	2.85049	0.276809	123.3	3.48127	120.437	11.6955	64.2588	236.12	123.3	3.48127	NA	exclude	younger than independent constraints
A-71	IESNI0023	mineral	zircon	A-71-7					386.114	18801.2	3.00088	20.1756	6.09079	0.223723	7.5085	0.0327369	4.39088	0.584788	207.655	8.97259	205.004	13.9392	174.609	142.227	207.655	8.97259	NA
A-71	IESNI0023	mineral	zircon	A-71-24					443.138	41328.3	2.63681	19.1274	3.8282	0.242294	4.81161	0.0336122	2.91487	0.6058	213.116	6.1105	220.297	9.52909	297.724	87.3593	213.116	6.1105	NA
A-71	IESNI0023	mineral	zircon	A-71-12					310.003	43008	2.92931	19.4547	6.63385	0.242691	7.08432	0.0342434	2.48588	0.3509	217.052	5.30583	220.622	14.049	258.879	152.542	217.052	5.30583	NA
A-71	IESNI0023	mineral	zircon	A-71-16					562.654	58243.4	3.36104	20.1484	4.17169	0.23447	4.42895	0.0342631	1.48749	0.335855	217.174	3.17663	213.882	8.54175	177.758	97.3092	217.174	3.17663	NA
A-71	IESNI0023	mineral	zircon	A-71-23					670.947	34874.9	2.92683	20.12	3.1044	0.235746	3.28061	0.0344011	1.06069	0.323322	218.034	2.274	214.931	6.35485	181.047	72.3653	218.034	2.274	NA
A-71	IESNI0023	mineral	zircon	A-71-11					329.406	28457.1	3.55499	20.0303	5.90778	0.237096	6.20791	0.0344437	1.9069	0.307173	218.3	4.09308	216.039	12.0814	191.493	137.511	218.3	4.09308	NA
A-71	IESNI0023	mineral	zircon	A-71-26					480.263	40508.4	2.92461	19.4194	7.28344	0.24467	7.46958	0.03446	1.65716	0.221854	218.402	3.55864	222.237	14.9102	263.061	167.385	218.402	3.55864	NA
A-71	IESNI0023	mineral	zircon	A-71-1					196.826	26154.8	2.92215	18.1256	9.24111	0.262973	10.8581	0.0345701	5.70089	0.525036	219.088	12.2801	237.06	22.9601	419.126	206.774	219.088	12.2801	NA
A-71	IESNI0023	mineral	zircon	A-71-21					557.086	46785.5	2.62162	20.0036	4.05907	0.238742	4.32289	0.0346368	1.48706	0.343996	219.503	3.20919	217.39	8.45986	194.593	94.409	219.503	3.20919	NA
A-71	IESNI0023	mineral	zircon	A-71-22					619.329	49707.7	2.45821	19.9692	3.15662	0.239579	3.26344	0.0346984	0.828102	0.253751	219.887	1.79019	218.076	6.40451	198.558	73.3402	219.887	1.79019	NA
A-71	IESNI0023	mineral	zircon	A-71-27					1606.74	162437	2.61421	19.7392	1.19979	0.242716	1.80534	0.0347478	1.34898	0.747218	220.195	2.92023	220.642	3.58028	225.395	27.7362	220.195	2.92023	NA
A-71	IESNI0023	mineral	zircon	A-71-4					935.5	97414.5	4.727	19.551	2.23717	0.245922	4.60111	0.0348711	4.02061	0.873834	220.963	8.73352	223.258	9.2217	247.515	51.4885	220.963	8.73352	NA
A-71	IESNI0023	mineral	zircon	A-71-28					502.298	60640.1	3.90022	19.9382	2.83733	0.24215	6.22749	0.0350162	5.54357	0.890178	221.867	12.0901	220.18	12.3275	202.206	65.8757	221.867	12.0901	NA
A-71	IESNI0023	mineral	zircon	A-71-19					562.344	6147.87	3.03443	18.9571	5.48416	0.254798	5.77052	0.0350323	1.79523	0.311103	221.967	3.91699	230.467	11.8984	318.062	124.731	221.967	3.91699	NA
A-71	IESNI0023	mineral	zircon	A-71-20					553.817	29147.6	3.08978	19.8404	3.14921	0.243569	3.72616	0.0350487	1.99166	0.534508	222.069	4.34755	221.339	7.41057	213.607	72.9673	222.069	4.34755	NA
A-71	IESNI0023	mineral	zircon	A-71-13					427.168	29138.6	2.16916	19.1815	5.22146	0.25329	9.68408	0.035237	8.15584	0.84219	223.242	17.8956	229.245	19.8751	291.297	119.34	223.242	17.8956	NA
A-71	IESNI0023	mineral	zircon	A-71-18					520.641	28185.7	2.49174	19.8712	4.19149	0.248938	5.97373	0.0358768	4.25639	0.712517	227.225	9.50309	225.713	12.0905	209.967	97.1782	227.225	9.50309	NA
A-71	IESNI0023	mineral	zircon	A-71-6					782.651	50839.3	2.28141	19.7497	2.09855	0.251799	2.55429	0.0360674	1.45618	0.570093	228.41	3.26784	228.037	5.21703	224.17	48.5244	228.41	3.26784	NA
A-71	IESNI0023	mineral	zircon	A-71-25					424.212	39996.7	3.45915	20.01	5.34369	0.248884	5.45161	0.0361197	1.07936	0.197989	228.736	2.42559	225.669	11.0318	193.848	124.333	228.736	2.42559	NA
A-71	IESNI0023	mineral	zircon	A-71-9					181.401	21598.5	3.46163	21.4456	12.4619	0.232466	12.9288	0.0361573	3.44306	0.266311	228.97	7.74522	212.232	24.7661	30.3097	299.647	228.97	7.74522	NA
A-71	IESNI0023	mineral	zircon	A-71-5					487.268	42869.2	3.09305	19.7174	2.42885	0.254613	3.31372	0.0364107	2.2542	0.680262	230.546	5.10513	230.316	6.82846	227.967	56.1273	230.546	5.10513	NA
A-71	IESNI0023	mineral	zircon	A-71-8					689.952	121161	2.11661	19.5927	2.57105	0.263514	5.35502	0.0374452	4.69744	0.877203	236.978	10.9298	237.494	11.3405	242.587	59.2694	236.978	10.9298	NA
A-71	IESNI0023	mineral	zircon	A-71-10					284.067	35821.7	3.58549	18.9626	5.38542	0.282262	6.47647	0.0388194	3.59749	0.55547	245.511	8.66615	252.45	14.4768	317.411	122.497	245.511	8.66615	NA		isolated older age
A-71	IESNI0023	mineral	zircon	A-71-17					345.475	29435.6	3.04121	19.8074	4.99843	0.277628	5.43376	0.0398832	2.13107	0.39219	252.109	5.26892	248.774	11.9897	217.434	115.778	252.109	5.26892	NA		isolated older age
A-71	IESNI0023	mineral	zircon	A-71-3					673.116	31799.4	3.86529	19.3767	4.61024	0.284661	6.48981	0.0400043	4.56763	0.703817	252.86	11.3261	254.348	14.6026	268.072	105.797	252.86	11.3261	NA		isolated older age
B34A	IESNI001V	mineral	zircon	B34A-9					527.121	26216.1	1.78378	20.4757	6.30839	0.154204	10.2582	0.0228999	8.08917	0.788557	145.957	11.6741	145.617	13.9169	140.089	148.222	145.957	11.6741	NA
B34A	IESNI001V	mineral	zircon	B34A-2					369.551	14467.6	1.72324	20.0427	7.75322	0.161242	9.42599	0.0234386	5.36068	0.568713	149.352	7.91423	151.789	13.2903	190.052	180.596	149.352	7.91423	NA
B34A	IESNI001V	mineral	zircon	B34A-11					1119.35	61409.5	3.49096	20.4846	2.82056	0.160204	3.65692	0.0238013	2.32755	0.636478	151.635	3.4882	150.882	5.1273	139.081	66.232	151.635	3.4882	NA
B34A	IESNI001V	mineral	zircon	B34A-14					720.907	40964.9	1.63127	20.2135	4.4037	0.162382	4.53915	0.0238055	1.10059	0.242466	151.662	1.6497	152.786	6.43872	170.238	102.866	151.662	1.6497	NA
B34A	IESNI001V	mineral	zircon	B34A-5					229.898	1349.56	2.60854	19.8367	12.0617	0.168348	12.3316	0.0242201	2.56595	0.208079	154.272	3.91155	157.984	18.0439	214.037	280.246	154.272	3.91155	NA
B34A	IESNI001V	mineral	zircon	B34A-7					721.795	20733.2	1.3088	20.4569	5.97137	0.164369	6.29165	0.024387	1.98181	0.31499	155.323	3.04141	154.521	9.01854	142.245	140.264	155.323	3.04141	NA
B34A	IESNI001V	mineral	zircon	B34A-6					452.744	15359.7	2.87733	21.4158	7.1905	0.158565	7.51712	0.0246287	2.19177	0.291571	156.843	3.39617	149.447	10.4468	33.6421	172.397	156.843	3.39617	NA
B34A	IESNI001V	mineral	zircon	B34A-21					644.269	24337.7	3.08935	19.5148	6.66913	0.174505	6.99279	0.0246985	2.1028	0.30071	157.283	3.26732	163.321	10.5499	251.802	153.55	157.283	3.26732	NA
B34A	IESNI001V	mineral	zircon	B34A-15					256.452	5999.21	1.23221	21.6237	8.10949	0.158619	8.7204	0.0248761	3.20648	0.367699	158.4	5.01717	149.493	12.1227	10.4641	195.357	158.4	5.01717	NA
B34A	IESNI001V	mineral	zircon	B34A-8					542.049	27673.1	2.80264	20.4316	7.0798	0.167878	8.3499	0.0248769	4.42688	0.530172	158.404	6.92692	157.576	12.1879	145.122	166.25	158.404	6.92692	NA
B34A	IESNI001V	mineral	zircon	B34A-15					220.063	8702.85	1.03484	21.1901	22.8423	0.1625	22.9939	0.0249737	2.63648	0.11466	159.014	4.14109	152.889	32.6477	58.9724	550.668	159.014	4.14109	NA
B34A	IESNI001V	mineral	zircon	B34A-23					778.941	31648.4	1.11297	20.1003	3.81515	0.17187	4.13348	0.0250554	1.59071	0.384835	159.527	2.50647	161.04	6.15562	183.326	88.8776	159.527	2.50647	NA
B34A	IESNI001V	mineral	zircon	B34A-19					940.864	58477	1.43391	20.0441	2.56169	0.172726	3.35703	0.0251098	2.16966	0.646303	159.869	3.42597	161.782	5.02055	189.895	59.6005	159.869	3.42597	NA
B34A	IESNI001V	mineral	zircon	B34A-26					125.932	6965.79	1.82996	19.8187	25.558	0.174697	26.1175	0.0251108	5.37689	0.205873	159.875	8.49061	163.487	39.4584	216.093	600.388	159.875	8.49061	NA
B34A	IESNI001V	mineral	zircon	B34A-20					1014.03	54856.1	1.1584	20.1946	2.48084	0.173023	3.25009	0.0253418	2.09965	0.646028	161.328	3.3453	162.039	4.86773	172.419	57.911	161.328	3.3453	NA
B34A	IESNI001V	mineral	zircon	B34A-34					667.087	31926.3	1.54024	20.2691	4.38858	0.172391	5.08052	0.0253424	2.55968	0.503823	161.332	4.07834	161.492	7.58556	163.815	102.62	161.332	4.07834	NA
B34A	IESNI001V	mineral	zircon	B34A-28					294.098	17623.5	1.51507	19.7621	9.02556	0.177677	9.2848	0.0254662	2.17872	0.234654	162.11	3.48789	166.06	14.2245	222.72	209.075	162.11	3.48789	NA
B34A	IESNI001V	mineral	zircon	B34A-4					179.391	8309.46	2.36448	26.2569	30.7959	0.134663	31.1262	0.0256444	4.52285	0.145307	163.23	7.28997	128.279	37.5263	-479.267	832.534	163.23	7.28997	NA
B34A	IESNI001V	mineral	zircon	B34A-32					178.478	12732.1	1.37246	22.6157	13.0061	0.15666	13.2217	0.0256961	2.3782	0.179871	163.555	3.84075	147.776	18.1851	-98.5704	320.613	163.555	3.84075	NA
B34A	IESNI001V	mineral	zircon	B34A-24					174.441	7899.43	1.18448	22.3404	16.9086	0.159501	17.1233	0.0258436	2.70306	0.157858	164.482	4.38981	150.267	23.9216	-68.5642	415.418	164.482	4.38981	NA
B34A	IESNI001V	mineral	zircon	B34A-31					242.811	17932.7	1.59899	21.2027	7.13732	0.168518	7.8143	0.0259141	3.1815	0.407138	164.925	5.18055	158.132	11.4433	57.5068	170.34	164.925	5.18055	NA
B34A	IESNI001V	mineral	zircon	B34A-27					2246.52	71601	0.944748	20.1388	1.72798	0.177579	3.7058	0.0259373	3.27827	0.884632	165.071	5.34278	165.975	5.67438	178.868	40.2729	165.071	5.34278	NA
B34A	IESNI001V	mineral	zircon	B34A-18					420.923	18062	1.64717	20.8577	10.3242	0.171751	10.5769	0.0259815	2.2984	0.217304	165.348	3.75205	160.937	15.743	96.5009	244.931	165.348	3.75205	NA
B34A	IESNI001V	mineral	zircon	B34A-33					662.708	34935	1.63396	20.5092	3.11875	0.17509	3.29933	0.0260441	1.07654	0.326292	165.742	1.76154	163.827	4.99171	136.223	73.28	165.742	1.76154	NA
B34A	IESNI001V	mineral	zircon	B34A-22					161.914	6578.91	1.25067	22.5677	25.5066	0.15974	25.6075	0.0261457	2.27051	0.0886658	166.38	3.72935	150.475	35.8286	-93.3548	634.668	166.38	3.72935	NA
B34A	IESNI001V	mineral	zircon	B34A-17					989.296	48490.7	2.67974	20.1789	4.33232	0.179203	4.99582	0.0262265	2.48782	0.497979	166.888	4.09858	167.374	7.70907	174.237	101.146	166.888	4.09858	NA
B34A	IESNI001V	mineral	zircon	B34A-29					253.513	15124	1.42963	19.561	13.73	0.188124	14.0037	0.0266891	2.75529	0.196754	169.793	4.61723	175.027	22.5179	246.331	317.448	169.793	4.61723	NA
B34A	IESNI001V	mineral	zircon	B34A-1					384.008	15200.6	1.78468	20.0203	4.7981	0.185666	6.90061	0.0269589	4.9595	0.718705	171.487	8.39277	172.924	10.9725	192.652	111.651	171.487	8.39277	NA
B34A	IESNI001V	mineral	zircon	B34A-10					370.789	16875.8	2.73016	20.7323	11.7552	0.18054	12.1598	0.027147	3.11069	0.255817	172.667	5.29985	168.525	18.8843	110.764	278.31	172.667	5.29985	NA
B34A	IESNI001V	mineral	zircon	B34A-35					105.431	9750.81	3.50416	18.2331	28.1135	0.208566	28.4557	0.0275805	4.40015	0.154631	175.388	7.61328	192.348	49.9024	405.902	640.721	175.388	7.61328	NA
B34A	IESNI001V	mineral	zircon	B34A-30					262.999	4216.5	1.39041	16.0214	15.2729	0.23779	16.3794	0.0276308	5.91796	0.361306	175.703	10.2576	216.609	31.9607	688.427	327.612	175.703	10.2576	NA
B34A	IESNI001V	mineral	zircon	B34A-25					823.363	72638.7	3.06082	20.0111	3.87744	0.216744	5.21446	0.031457	3.48654	0.668631	199.661	6.85456	199.196	9.4319	193.724	90.1714	199.661	6.85456	NA	exclude	inheritance
B34A	IESNI001V	mineral	zircon	B34A-12					930.998	76916.1	2.55369	19.6625	3.05861	0.224936	3.4435	0.0320772	1.58198	0.459409	203.536	3.16958	206.01	6.42069	234.431	70.6083	203.536	3.16958	NA	exclude	inheritance
B34A	IESNI001V	mineral	zircon	B34A-16					2130.65	13639.2	2.45878	18.9392	4.2702	0.238492	4.66912	0.0327594	1.8884	0.404444	207.795	3.86143	217.185	9.12972	320.254	97.0595	207.795	3.86143	NA	exclude	inheritance
B34A	IESNI001V	mineral	zircon	B34A-3					533.677	51090.3	2.96729	19.7532	4.36191	0.230055	4.72672	0.0329585	1.82089	0.385233	209.038	3.74529	210.244	8.97653	223.761	100.904	209.038	3.74529	NA	exclude	inheritance
B34A	IESNI001V	mineral	zircon	B34A-13					2777.74	363111	2.05328	19.7067	0.60695	0.232562	2.15718	0.0332392	2.07004	0.959602	210.79	4.29286	212.311	4.13285	229.205	14.0402	210.79	4.29286	NA	exclude	inheritance
C-200	IESNI001U	mineral	zircon	C-200-12					1716.08	18164.3	2.65488	18.4743	2.08222	0.237806	2.33125	0.0318631	1.04836	0.449701	202.198	2.08687	216.622	4.54769	376.415	46.853	202.198	2.08687	NA	exclude	off concordia
C-200	IESNI001U	mineral	zircon	C-200-8					1038.51	32005.3	1.91236	18.6885	1.55503	0.241227	3.09788	0.0326964	2.67932	0.864888	207.402	5.46852	219.425	6.11329	350.437	35.146	207.402	5.46852	NA	exclude	off concordia
C-200	IESNI001U	mineral	zircon	C-200-27					1916.33	70826.5	1.24372	18.7758	1.21308	0.27175	2.33441	0.0370055	1.99447	0.854379	234.245	4.58809	244.092	5.06499	339.916	27.4491	234.245	4.58809	NA	exclude	off concordia
C-200	IESNI001U	mineral	zircon	C-200-21					219.899	1096.48	2.48446	27.7203	19.0925	0.120787	19.256	0.0242838	2.50388	0.130031	154.673	3.82674	115.785	21.0744	-625.237	525.589	154.673	3.82674	NA		cluster 1
C-200	IESNI001U	mineral	zircon	C-200-2					257.643	1305.91	1.97438	20.5367	21.7401	0.164277	21.8818	0.0244684	2.48612	0.113616	155.835	3.82779	154.44	31.3597	133.1	516.37	155.835	3.82779	NA		cluster 1
C-200	IESNI001U	mineral	zircon	C-200-30					236.384	1103.92	2.39875	26.529	16.2418	0.130949	16.5929	0.0251954	3.3957	0.204647	160.408	5.37976	124.95	19.5104	-506.676	435.293	160.408	5.37976	NA		cluster 1
C-200	IESNI001U	mineral	zircon	C-200-5					495.846	2779.14	5.04568	22.513	14.3781	0.159929	14.6899	0.0261132	3.01044	0.204933	166.176	4.93872	150.641	20.5686	-87.4002	353.953	166.176	4.93872	NA		cluster 1
C-200	IESNI001U	mineral	zircon	C-200-20					347.997	2118.03	2.3894	23.3327	14.8625	0.155618	15.3864	0.0263345	3.98096	0.258733	167.566	6.58479	146.861	21.0414	-175.813	372.317	167.566	6.58479	NA		cluster 1
C-200	IESNI001U	mineral	zircon	C-200-17					2059.99	12585.4	2.36477	19.8935	1.29545	0.220427	2.45799	0.0318035	2.0889	0.849842	201.826	4.15062	202.265	4.5078	207.373	30.0586	201.826	4.15062	NA		cluster2
C-200	IESNI001U	mineral	zircon	C-200-1					1427.69	9473.13	2.87886	19.2805	4.21564	0.229074	4.3721	0.0320326	1.15916	0.265126	203.257	2.31932	209.434	8.27424	279.526	96.5351	203.257	2.31932	NA		cluster2
C-200	IESNI001U	mineral	zircon	C-200-26					2220	41197.5	3.35504	19.3576	1.88488	0.22895	2.65533	0.0321433	1.8703	0.704356	203.948	3.75473	209.331	5.02294	270.337	43.2009	203.948	3.75473	NA		cluster2
C-200	IESNI001U	mineral	zircon	C-200-25					2272.05	15972.5	2.24782	18.8938	3.52902	0.236126	4.04185	0.0323566	1.97042	0.487504	205.281	3.98116	215.244	7.83972	325.66	80.1171	205.281	3.98116	NA		cluster2
C-200	IESNI001U	mineral	zircon	C-200-4					2700.35	44291.6	1.60877	19.2881	1.44781	0.232984	3.72017	0.0325923	3.42688	0.921163	206.752	6.97274	212.659	7.13787	278.62	33.1505	206.752	6.97274	NA		cluster2
C-200	IESNI001U	mineral	zircon	C-200-9					1773.64	18006.1	2.4632	19.4433	2.90758	0.23174	3.63431	0.0326791	2.18041	0.599951	207.294	4.44796	211.634	6.94291	260.245	66.7856	207.294	4.44796	NA		cluster2
C-200	IESNI001U	mineral	zircon	C-200-19					1862.71	19955	2.76245	19.4732	1.51267	0.23189	2.40148	0.0327506	1.86519	0.776683	207.741	3.81298	211.758	4.5901	256.68	34.7703	207.741	3.81298	NA		cluster2
C-200	IESNI001U	mineral	zircon	C-200-28					2274.44	16131.6	2.40103	19.8391	1.61034	0.228385	2.60458	0.0328615	2.04711	0.785965	208.433	4.1986	208.864	4.91704	213.761	37.3045	208.433	4.1986	NA		cluster2
C-200	IESNI001U	mineral	zircon	C-200-23					1865.87	23988.7	2.61681	18.745	2.53667	0.241947	3.13487	0.0328931	1.84193	0.587562	208.63	3.78129	220.013	6.20114	343.62	57.3964	208.63	3.78129	NA		cluster2
C-200	IESNI001U	mineral	zircon	C-200-3					1820.13	9576.9	2.53659	20.2384	2.26957	0.22604	2.84898	0.0331787	1.72213	0.604474	210.412	3.56508	206.924	5.33339	167.361	53.0371	210.412	3.56508	NA		cluster2
C-200	IESNI001U	mineral	zircon	C-200-31					1467.36	11187	2.22408	19.5859	2.71411	0.233691	3.35168	0.0331958	1.96656	0.586739	210.519	4.07312	213.241	6.44666	243.437	62.5528	210.519	4.07312	NA		cluster2
C-200	IESNI001U	mineral	zircon	C-200-15					2829.89	22124.5	1.96711	19.6762	1.62553	0.232879	2.15842	0.033233	1.42001	0.657893	210.751	2.94429	212.573	4.13979	232.783	37.5037	210.751	2.94429	NA		cluster2
C-200	IESNI001U	mineral	zircon	C-200-16					2581.31	15957.1	2.13487	19.6882	1.74862	0.232758	2.61253	0.033236	1.94105	0.742976	210.77	4.02498	212.473	5.00867	231.376	40.3561	210.77	4.02498	NA		cluster2
C-200	IESNI001U	mineral	zircon	C-200-11C					983.432	8046.49	2.77815	19.7207	3.07953	0.2341	4.76471	0.033483	3.63579	0.763066	212.31	7.59341	213.578	9.17761	227.592	71.1488	212.31	7.59341	NA		cluster2
C-200	IESNI001U	mineral	zircon	C-200-29					1711.96	9867.92	3.05282	19.7808	1.58639	0.233727	2.96897	0.0335313	2.50962	0.845281	212.611	5.2487	213.27	5.71123	220.551	36.7258	212.611	5.2487	NA		cluster2
C-200	IESNI001U	mineral	zircon	C-200-11					1870.01	10989.6	2.58162	19.9478	1.50311	0.232183	2.40144	0.0335911	1.87286	0.779889	212.985	3.92373	211.999	4.59474	201.061	34.9079	212.985	3.92373	NA		cluster2
C-200	IESNI001U	mineral	zircon	C-200-6					1513.5	8352.98	2.77997	20.5655	1.74302	0.22537	2.58474	0.0336152	1.9086	0.738411	213.135	4.00137	206.37	4.82702	129.778	40.9838	213.135	4.00137	NA		cluster2
C-200	IESNI001U	mineral	zircon	C-200-18					2004.3	13078.4	2.45844	19.9365	1.02463	0.233835	2.76897	0.033811	2.57241	0.929016	214.356	5.42346	213.36	5.3285	202.379	23.7949	214.356	5.42346	NA		cluster2
C-200	IESNI001U	mineral	zircon	C-200-32C					1692.43	10038.6	2.84688	19.5342	1.85792	0.24419	2.98306	0.0345957	2.33384	0.782364	219.247	5.03084	221.845	5.94481	249.511	42.7647	219.247	5.03084	NA		cluster2
C-200	IESNI001U	mineral	zircon	C-200-13					2167.44	15350	2.25682	19.8975	1.33099	0.240625	3.23494	0.0347247	2.94844	0.911437	220.051	6.3786	218.932	6.37092	206.915	30.8772	220.051	6.3786	NA		cluster2
C-200	IESNI001U	mineral	zircon	C-200-24					1586.6	11694.6	2.91218	19.5856	2.0251	0.245215	2.64463	0.0348323	1.70089	0.643149	220.721	3.69068	222.682	5.28811	243.468	46.6662	220.721	3.69068	NA		cluster2
C-200	IESNI001U	mineral	zircon	C-200-33C					1756.34	17087.8	2.73344	19.4487	1.40722	0.250308	3.25528	0.0353074	2.9354	0.901735	223.68	6.4533	226.827	6.61733	259.555	32.3196	223.68	6.4533	NA		cluster2
VT15-22-b	IESNI0027	mineral	zircon	VT15-22-b-SAMPLE 1 Spot 7					708.407	11525.3	2.46114	16.6684	1.85925	0.293936	3.12933	0.0355341	2.51712	0.804365	225.091	5.56805	261.653	7.2182	603.334	40.2556	225.091	5.56805	NA	exclude	off concordia
VT15-22-b	IESNI0027	mineral	zircon	VT15-22-b-SAMPLE 1 Spot 1					861.14	30172.7	1.53233	18.817	1.05173	0.276227	1.78349	0.0376977	1.44037	0.807617	238.546	3.37316	247.66	3.91958	334.947	23.8292	238.546	3.37316	NA	exclude	off concordia
VT15-22-b	IESNI0027	mineral	zircon	VT15-22-b-SAMPLE 1 Spot 5					383.792	20087.5	1.94662	18.4599	1.01795	0.306609	2.2534	0.04105	2.01037	0.892151	259.338	5.11019	271.549	5.36922	378.159	22.8859	259.338	5.11019	NA	exclude	off concordia
VT15-22-b	IESNI0027	mineral	zircon	VT15-22-b-SAMPLE 1 Spot 2					333.272	73395.7	1.97392	10.1605	0.627226	3.33383	4.17819	0.245674	4.13084	0.988668	1416.13	52.5196	1489.01	32.6467	1594.39	11.7131	1594.39	11.7131	88.8194	exclude	inheritance
VT15-22-b	IESNI0027	mineral	zircon	VT15-22-b-SAMPLE 1 Spot 3					614.774	31553.4	2.28642	19.3787	1.00461	0.27525	2.81375	0.0386856	2.6283	0.934091	244.681	6.31043	246.882	6.1667	267.84	23.0239	244.681	6.31043	NA
1-19	IESNI0020	mineral	zircon	I-19-20					850	51471	3.4	19.6374	1.8	0.2312	1.9	0.0329	0.8	0.41	208.8	1.6	211.2	3.7	237.3	40.8	208.8	1.6	NA		isolated young age
1-19	IESNI0020	mineral	zircon	I-19-5					291	17016	4.6	20.1596	8.2	0.2274	8.3	0.0333	0.5	0.06	210.9	1	208.1	15.5	176.5	192.4	210.9	1	NA		isolated young age
1-19	IESNI0020	mineral	zircon	I-19-17					587	66408	3.3	20.1822	2.5	0.2275	2.9	0.0333	1.5	0.5	211.2	3	208.1	5.4	173.8	57.9	211.2	3	NA
1-19	IESNI0020	mineral	zircon	I-19-1					817	58891	4.4	19.9748	2.5	0.2312	3.3	0.0335	2.1	0.63	212.4	4.3	211.2	6.2	197.9	58.8	212.4	4.3	NA
1-19	IESNI0020	mineral	zircon	I-19-22					680	46731	4.1	19.4038	2.1	0.2392	2.8	0.0337	1.8	0.65	213.4	3.8	217.7	5.5	264.9	48.8	213.4	3.8	NA
1-19	IESNI0020	mineral	zircon	I-19-8					648	54637	4.1	19.6705	2.4	0.2375	2.7	0.0339	1.3	0.49	214.8	2.8	216.4	5.2	233.5	54.3	214.8	2.8	NA
1-19	IESNI0020	mineral	zircon	I-19-14					981	89359	2.9	19.3499	1.9	0.2422	2.3	0.034	1.3	0.56	215.4	2.7	220.2	4.5	271.2	43.2	215.4	2.7	NA
1-19	IESNI0020	mineral	zircon	I-19-25					615	59958	3.7	19.8982	4	0.2362	4.4	0.0341	1.9	0.42	216	3.9	215.3	8.6	206.8	93.5	216	3.9	NA
1-19	IESNI0020	mineral	zircon	I-19-23					1180	86398	2.8	19.8548	1.7	0.2368	1.9	0.0341	0.8	0.44	216.1	1.8	215.8	3.7	211.9	39.5	216.1	1.8	NA
1-19	IESNI0020	mineral	zircon	I-19-11					1595	129849	2.7	19.6924	1.4	0.2394	2.4	0.0342	1.9	0.8	216.7	4.1	217.9	4.7	230.9	33.3	216.7	4.1	NA
1-19	IESNI0020	mineral	zircon	I-19-9					991	74012	3.3	19.6271	2.2	0.2407	2.5	0.0343	1.2	0.48	217.2	2.6	219	4.9	238.6	50.3	217.2	2.6	NA
1-19	IESNI0020	mineral	zircon	I-19-12					443	38416	2.6	20.2947	2.8	0.2332	3	0.0343	0.9	0.29	217.5	1.8	212.8	5.7	160.9	66	217.5	1.8	NA
1-19	IESNI0020	mineral	zircon	I-19-18					915	70870	3	19.8395	1.6	0.2387	2	0.0343	1.2	0.58	217.7	2.5	217.3	3.9	213.7	37.9	217.7	2.5	NA
1-19	IESNI0020	mineral	zircon	I-19-2					1247	119865	4.2	19.793	2	0.2397	2.8	0.0344	2	0.72	218.1	4.4	218.2	5.6	219.1	45.4	218.1	4.4	NA
1-19	IESNI0020	mineral	zircon	I-19-3					942	61388	2.8	19.9068	1.8	0.2388	2.8	0.0345	2.2	0.77	218.5	4.7	217.4	5.5	205.8	41.8	218.5	4.7	NA
1-19	IESNI0020	mineral	zircon	I-19-4					773	47130	3.7	19.4152	1.2	0.2452	1.5	0.0345	0.9	0.62	218.8	2	222.7	3	263.5	27	218.8	2	NA
1-19	IESNI0020	mineral	zircon	I-19-6					748	26783	3.2	19.2896	2.5	0.2476	2.8	0.0346	1.3	0.45	219.5	2.8	224.6	5.7	278.4	57.8	219.5	2.8	NA
1-19	IESNI0020	mineral	zircon	I-19-16					468	33790	3.9	20.3757	4.6	0.2346	4.7	0.0347	0.7	0.15	219.7	1.5	214	9.1	151.6	109	219.7	1.5	NA
1-19	IESNI0020	mineral	zircon	I-19-21					529	45665	4	19.4257	3	0.246	3.5	0.0347	1.8	0.5	219.7	3.8	223.3	7.1	262.3	69.8	219.7	3.8	NA
1-19	IESNI0020	mineral	zircon	I-19-24					767	70898	3.4	19.7899	1.5	0.2418	2.2	0.0347	1.7	0.75	219.9	3.6	219.9	4.4	219.5	34.2	219.9	3.6	NA
1-19	IESNI0020	mineral	zircon	I-19-10					659	64646	4.7	19.561	2.1	0.2448	2.2	0.0347	0.7	0.33	220	1.6	222.3	4.5	246.3	48.5	220	1.6	NA
1-19	IESNI0020	mineral	zircon	I-19-19					600	54958	3.7	19.5368	2.3	0.2451	2.5	0.0347	1.1	0.43	220.1	2.3	222.6	5	249.2	51.9	220.1	2.3	NA
1-19	IESNI0020	mineral	zircon	I-19-7					808	76880	3.1	19.7962	1.7	0.2422	2.1	0.0348	1.3	0.6	220.4	2.8	220.3	4.2	218.8	39.4	220.4	2.8	NA
1-19	IESNI0020	mineral	zircon	I-19-15					835	74111	3	20.1248	2.4	0.2419	3.4	0.0353	2.5	0.72	223.7	5.5	220	6.8	180.5	55.8	223.7	5.5	NA
2-1	IESNI0025	mineral	zircon	2-1-41671					379	27372	2.6	19.8121	4.1	0.224	9.4	0.0322	8.5	0.9	204.2	17	205.2	17.5	216.9	95.2	204.2	17	NA
2-1	IESNI0025	mineral	zircon	2-1-42036					277	21298	2.8	19.1198	5.9	0.2346	8	0.0325	5.4	0.68	206.3	11	214	15.5	298.6	135.1	206.3	11	NA
2-1	IESNI0025	mineral	zircon	2-1-42767					336	33569	2.9	20.6445	8.5	0.2183	10.1	0.0327	5.6	0.55	207.3	11.4	200.5	18.5	120.7	199.5	207.3	11.4	NA
2-1	IESNI0025	mineral	zircon	2-1-42401					421	37240	2.5	19.6034	5.7	0.2313	8.3	0.0329	6	0.72	208.6	12.3	211.3	15.8	241.3	131.5	208.6	12.3	NA
2-1	IESNI0025	mineral	zircon	2-1-43862					219	12537	3.8	21.2983	23.5	0.213	25.5	0.0329	9.7	0.38	208.7	19.9	196	45.4	46.8	569	208.7	19.9	NA
2-1	IESNI0025	mineral	zircon	2-1-39114					372	30117	2.6	19.604	9.6	0.232	10.3	0.033	3.8	0.37	209.3	7.8	211.9	19.7	241.3	221.2	209.3	7.8	NA
2-1	IESNI0025	mineral	zircon	2-1-44228					369	20495	3.1	19.6738	4.7	0.2335	10.9	0.0333	9.8	0.9	211.3	20.5	213.1	21	233.1	109.3	211.3	20.5	NA
2-1	IESNI0025	mineral	zircon	2-1-43132					502	41053	2.4	19.3111	5.5	0.2425	6.1	0.034	2.7	0.45	215.3	5.8	220.5	12.2	275.9	126.1	215.3	5.8	NA
2-1	IESNI0025	mineral	zircon	2-1-37288					734	61722	1.9	19.6394	2	0.2394	3.2	0.0341	2.5	0.79	216.2	5.3	218	6.2	237.1	45.2	216.2	5.3	NA
2-1	IESNI0025	mineral	zircon	2-1-37653					527	32396	2.2	19.7602	4	0.238	6.9	0.0341	5.7	0.82	216.2	12.1	216.8	13.5	223	92.3	216.2	12.1	NA
2-1	IESNI0025	mineral	zircon	2-1-39479					531	30574	1.9	19.0769	3	0.2465	3.9	0.0341	2.6	0.65	216.2	5.5	223.7	7.9	303.7	67.9	216.2	5.5	NA
2-1	IESNI0025	mineral	zircon	2-1-41306					503	29896	3.2	19.7776	2.4	0.2392	3	0.0343	1.7	0.57	217.5	3.7	217.8	5.8	220.9	56.5	217.5	3.7	NA
2-1	IESNI0025	mineral	zircon	2-1-36923					234	16330	3	19.8442	8.2	0.2387	8.7	0.0344	2.9	0.33	217.8	6.2	217.4	17.1	213.1	190.8	217.8	6.2	NA
2-1	IESNI0025	mineral	zircon	2-1-38384					630	36248	1.9	19.5894	2.9	0.2438	5	0.0346	4	0.81	219.5	8.6	221.5	9.9	243	67.8	219.5	8.6	NA
2-1	IESNI0025	mineral	zircon	2-1-38018					556	33839	2.2	19.7384	4.5	0.2424	6.5	0.0347	4.8	0.73	219.9	10.3	220.4	12.9	225.5	103.7	219.9	10.3	NA
2-1	IESNI0025	mineral	zircon	2-1-38749					680	54376	2	19.7087	2.6	0.244	4.3	0.0349	3.4	0.79	221	7.5	221.7	8.6	229	60.8	221	7.5	NA
2-1	IESNI0025	mineral	zircon	2-1-40210					772	58869	1.4	19.8145	2.7	0.2469	4.2	0.0355	3.2	0.77	224.8	7.2	224.1	8.5	216.6	62.8	224.8	7.2	NA
2-1	IESNI0025	mineral	zircon	2-1-40575					479	32724	1.9	20.0045	4	0.2457	4.6	0.0357	2.2	0.47	225.8	4.8	223.1	9.1	194.5	93.6	225.8	4.8	NA
2-1	IESNI0025	mineral	zircon	2-1-40940					1373	89968	1.1	19.7013	0.9	0.2526	1.5	0.0361	1.1	0.77	228.6	2.5	228.7	3	229.8	21.5	228.6	2.5	NA
2-1	IESNI0025	mineral	zircon	2-1-39845					786	52493	1.6	19.7753	2.4	0.2519	3.1	0.0361	2	0.65	228.8	4.5	228.2	6.3	221.2	54.4	228.8	4.5	NA
FG-2-10	IESNI001R	mineral	zircon	FG-2-10--9					215.608	7905.73	1.72588	20.3947	17.9972	0.109302	18.1837	0.0161676	2.59754	0.14285	103.389	2.66416	105.327	18.1944	149.385	424.799	103.389	2.66416	NA		isolated young age
FG-2-10	IESNI001R	mineral	zircon	FG-2-10--15A					251.646	18573.6	1.93176	19.5654	10.7016	0.120773	10.9133	0.0171378	2.13877	0.195979	109.541	2.32305	115.772	11.9414	245.846	247.081	109.541	2.32305	NA
FG-2-10	IESNI001R	mineral	zircon	FG-2-10--11					165.242	41557.2	3.70621	17.4935	11.7928	0.13701	12.5125	0.0173831	4.1825	0.334265	111.096	4.60677	130.377	15.3107	497.852	260.574	111.096	4.60677	NA
FG-2-10	IESNI001R	mineral	zircon	FG-2-10--3					202.55	3031.99	2.42059	21.2114	11.9414	0.113011	12.1415	0.0173856	2.19503	0.180787	111.112	2.41804	108.716	12.5183	56.5486	285.627	111.112	2.41804	NA
FG-2-10	IESNI001R	mineral	zircon	FG-2-10--17					749.212	16911	1.52269	19.9108	4.38643	0.120527	5.56447	0.0174049	3.42382	0.615301	111.234	3.77578	115.549	6.07743	205.373	101.806	111.234	3.77578	NA
FG-2-10	IESNI001R	mineral	zircon	FG-2-10--7					158.037	7227	4.83908	24.1125	18.2921	0.100061	18.6636	0.0174986	3.70511	0.198521	111.828	4.10762	96.8322	17.239	-258.464	466.849	111.828	4.10762	NA
FG-2-10	IESNI001R	mineral	zircon	FG-2-10--6					602.926	22953.8	1.62634	21.1311	4.24608	0.114389	4.52132	0.017531	1.55344	0.34358	112.033	1.72532	109.973	4.71245	65.5933	101.104	112.033	1.72532	NA
FG-2-10	IESNI001R	mineral	zircon	FG-2-10--18					494.577	4407.91	2.06337	17.1045	23.404	0.141391	24.9629	0.0175401	8.68331	0.347848	112.091	9.64906	134.282	31.4089	547.177	517.713	112.091	9.64906	NA
FG-2-10	IESNI001R	mineral	zircon	FG-2-10--6A					546.585	19355.7	1.79269	20.5017	4.17614	0.118453	4.43002	0.017613	1.47813	0.333663	112.552	1.64923	113.668	4.76393	137.124	98.1324	112.552	1.64923	NA
FG-2-10	IESNI001R	mineral	zircon	FG-2-10--19A					494.304	5621.66	1.29148	19.7613	4.70672	0.123575	4.92301	0.0177111	1.44318	0.29315	113.174	1.61904	118.308	5.49785	222.847	108.887	113.174	1.61904	NA
FG-2-10	IESNI001R	mineral	zircon	FG-2-10--10					978.472	2798.89	1.43981	18.8812	8.62475	0.132134	8.66311	0.0180944	0.814323	0.093999	115.601	0.932977	126.014	10.2668	327.201	196.087	115.601	0.932977	NA
FG-2-10	IESNI001R	mineral	zircon	FG-2-10--14					246.834	15486.2	1.84834	17.9343	12.7702	0.139295	14.0802	0.0181183	5.93092	0.421223	115.753	6.80393	132.415	17.4816	442.763	285.037	115.753	6.80393	NA
FG-2-10	IESNI001R	mineral	zircon	FG-2-10--8A					224.635	4268.99	2.63579	20.6548	10.4533	0.121209	10.569	0.0181574	1.55925	0.147531	116	1.79256	116.167	11.6019	119.602	246.927	116	1.79256	NA
FG-2-10	IESNI001R	mineral	zircon	FG-2-10--12					445.513	8635.27	1.88222	20.2462	7.32043	0.125337	7.5518	0.0184043	1.85498	0.245634	117.563	2.16101	119.899	8.54056	166.46	171.231	117.563	2.16101	NA
FG-2-10	IESNI001R	mineral	zircon	FG-2-10--15					122.63	5562.03	2.52703	20.8062	19.5877	0.12318	20.0787	0.0185879	4.41331	0.2198	118.725	5.19175	117.95	22.3628	102.354	466.991	118.725	5.19175	NA
FG-2-10	IESNI001R	mineral	zircon	FG-2-10--5					341.011	7166.98	2.11613	20.7987	6.45305	0.123306	6.85838	0.0186003	2.32281	0.338682	118.804	2.73431	118.065	7.64446	103.213	152.674	118.804	2.73431	NA
FG-2-10	IESNI001R	mineral	zircon	FG-2-10--1					310.873	3305.83	1.28843	19.1656	7.85598	0.135756	9.25019	0.0188703	4.88361	0.527947	120.512	5.83069	129.257	11.2272	293.176	179.648	120.512	5.83069	NA
FG-2-10	IESNI001R	mineral	zircon	FG-2-10--8					293.419	44861.9	2.98838	21.4093	11.273	0.121706	13.2215	0.0188979	6.90841	0.522514	120.687	8.25999	116.617	14.5671	34.3419	270.68	120.687	8.25999	NA
FG-2-10	IESNI001R	mineral	zircon	FG-2-10--2B					227.502	21555.3	2.66026	21.7533	11.441	0.120592	11.7827	0.0190258	2.81681	0.239064	121.496	3.39027	115.609	12.8756	-3.93333	276.746	121.496	3.39027	NA
FG-2-10	IESNI001R	mineral	zircon	FG-2-10--3					425.716	2327.94	1.70396	19.7354	4.99598	0.134039	8.90697	0.0191857	7.37389	0.827878	122.508	8.94828	127.721	10.6901	225.88	115.536	122.508	8.94828	NA
FG-2-10	IESNI001R	mineral	zircon	FG-2-10--2A					837.867	10367.4	4.61705	19.3799	3.6549	0.136595	5.16222	0.0191992	3.64558	0.706203	122.593	4.427	130.007	6.29943	267.702	83.8641	122.593	4.427	NA
FG-2-10	IESNI001R	mineral	zircon	FG-2-10--20					643.018	48844.5	1.51745	20.5214	4.55996	0.129167	5.12026	0.0192245	2.32892	0.454844	122.753	2.83178	123.349	5.94729	134.848	107.224	122.753	2.83178	NA
FG-2-10	IESNI001R	mineral	zircon	FG-2-10--16					673.997	4352.67	1.36445	19.5034	5.82299	0.140573	6.75677	0.0198844	3.42735	0.507247	126.925	4.30762	133.554	8.45586	253.102	134.004	126.925	4.30762	NA		isolated older age
FG-2-10	IESNI001R	mineral	zircon	FG-2-10--19					748.894	3447.4	2.84723	20.0933	4.38266	0.136667	5.37634	0.0199165	3.11406	0.579215	127.128	3.92007	130.071	6.56377	184.145	102.135	127.128	3.92007	NA		isolated older age
FG-2-10	IESNI001R	mineral	zircon	FG-2-10--2					623.628	38832.2	2.69414	20.2145	3.49409	0.143887	4.56236	0.0210952	2.93367	0.643016	134.574	3.90703	136.5	5.82724	170.123	81.6073	134.574	3.90703	NA	exclude	inheritance
FG-2-10	IESNI001R	mineral	zircon	FG-2-10--13					305.517	4475.53	1.61919	19.523	8.19509	0.149964	9.36577	0.0212341	4.53411	0.484115	135.451	6.07741	141.88	12.4022	250.789	188.814	135.451	6.07741	NA	exclude	inheritance

## Sheet: 4 Primary Analytical Metadata
Primary Analytical Metadata
FROM DATA TAB	Measured Parameter		ANALYTICAL PROCEDURE						ANALYTICAL ACCURACY & REPRODUCIBILITY
METHOD CODE	PARAMETER		TECHNIQUE	instrument	LABORATORY	analyst	analysis date		REFERENCE SAMPLE NAME	REFERENCE SAMPLE MEASURED VALUE	REFERENCE UNCERTAINTY	REFERENCE UNCERTAINTY UNIT	NUMBER OF MEASUREMENTS
must match a code in the DATA tab row 3	must match a parameter in the DATA tab row 2		[view list]	e.g. Thermo-Finnigan Triton	e.g. Woods Hole Oceanographic Institute	name of analyst	MM/DD/YYYY		e.g. SRM-981		standard deviation	e.g. ppm, wt%	leave blank if 1
1	U (ppm)		ICP:MS-LA-MC	Nu Plasma mulitcollector ICPMS	LaserChron Center, University of Arizona				HC18-AW-17-15	739.35	UNKNOWN	ppm
1	Pb206_Pb204		ICP:MS-LA-MC	Nu Plasma mulitcollector ICPMS	LaserChron Center, University of Arizona				HC18-AW-17-15	10445.8	UNKNOWN
2	U_Th		CALC		LaserChron Center, University of Arizona				HC18-AW-17-15	1.73576	UNKNOWN
1	Pb206_Pb207		ICP:MS-LA-MC	Nu Plasma mulitcollector ICPMS	LaserChron Center, University of Arizona				HC18-AW-17-15	20.8476	0.99999	%
1	Pb207_U235		ICP:MS-LA-MC	Nu Plasma mulitcollector ICPMS	LaserChron Center, University of Arizona				HC18-AW-17-15	0.0969506	1.64989	%
1	Pb206_U238		ICP:MS-LA-MC	Nu Plasma mulitcollector ICPMS	LaserChron Center, University of Arizona				HC18-AW-17-15	0.0146654	1.31231	%
2	error correlation		CALC		LaserChron Center, University of Arizona				HC18-AW-17-15	0.795392
1	Pb206_U238 Age		ICP:MS-LA-MC	Nu Plasma mulitcollector ICPMS	LaserChron Center, University of Arizona				HC18-AW-17-15	93.8527	1.22271	Ma
1	Pb207_U235 Age		ICP:MS-LA-MC	Nu Plasma mulitcollector ICPMS	LaserChron Center, University of Arizona				HC18-AW-17-15	93.9576	1.48064	Ma
1	Pb206_Pb207 Age		ICP:MS-LA-MC	Nu Plasma mulitcollector ICPMS	LaserChron Center, University of Arizona				HC18-AW-17-15	96.6076	23.6797	Ma
2	BestAge		CALC		LaserChron Center, University of Arizona				HC18-AW-17-15	93.8527	1.22271	Ma
2	Concardance%		CALC			Snir Attia
2	Filter		CALC			Snir Attia
2	Comment		CALC			Snir Attia

## Sheet: 5 Notes and Refs
Notes for U-Pb Data Table
Analyses with red text have been flitered due to violating concordance criteria or being significantly younger or older than independent age controls. Analyses with blue text are young isolated ages or older ages not included in rock age estimates.
Analyses with >10% uncertainty (1-sigma) in 206Pb/238U age are not included. Analyses with >10% uncertainty (1-sigma) in 206Pb/207Pb age are not included, unless 206Pb/238U age is <400 Ma. Best age is determined from 206Pb/238U age for analyses with 206Pb/238U age <900 Ma and from 206Pb/207Pb age for analyses with 206Pb/238Uage >900 Ma. Concordance is based on 206Pb/238U age / 206Pb/207Pb age. Va…
References:
Gehrels, G.E., and Pecha, M., 2014, Detrital zircon U-Pb geochronology and Hf isotope geochemistry of Paleozoic and Triassic passive margin strata of western North America: Geosphere, v. 10, p. 49-65.
Gehrels, G.E., Valencia, V., and Ruiz, J., 2008, Enhanced precision, accuracy, efficiency, and spatial resolution of U-Pb ages by laser ablation-multicollector-inductively coupled plasma-mass spectrometry: Geochemistry, Geophysics, Geosystems, v. 9, Q03017, doi:10.1029/2007GC001805.
Stacey, J.S., and Kramers, J.D., 1975, Approximation of terrestrial lead isotope evolution by a two stage model: Earth and Planetary Science Letters, v. 26, p. 207-221.

## Sheet: 6 Vocabularies
Vocabularies
This tab contains the suggested Vocabularies for EarthChem Data Submissions: Parameter, Technique, Unit. Please scroll to the right to see the entire page
The EarthChem Vocabularies are maintained at http://www.earthchem/resources/vocabularies
Contact us with questions or additions: info@earthchem.org
Last modified: 21 Apr 2014
Parameter	Parameter Description		Technique	Technique Description		Unit	Unit Description		Mineral Code	Mineral Description
AB	albite		14C	CARBON 14 AGE DETERMINATION		%	percent		AB	ALBITE
AC	acmite		AA	ACTIVATION ANALYSIS		age	age		ACC	ACCESSORY MINERALS
ACC	accessory minerals		AAS	ATOMIC ABSORPTION		atoms/g	atoms per gram		ACT	ACTINOLITE
ACETATE	acetate		AGE:ASSIG	Assigned Sample Age		bar	bar		ACT-HORN	ACTINOLITIC HORNBLENDE
ACT	actinolite		AGE:GEO	Geological Sample Age		CC	cubic centimeter		AEG	AEGIRINE
ACT-HORN	actinolitic hornblende		ALPHA	ALPHA COUNTING		cc/g	cubic centimeters per gram		AL-SAP	ALUMINUM SAPONITE
AEG	aegirine		ALPHA-ID	ALPHA COUNTING ISOTOPE DILUTION		ccstp	cubic centimeters at standard temperature and pressure		ALLA	ALLANITE
Ag	silver		AMS	ACCELERATOR MASS SPECTROMETRY		ccstp/g	cubic centimeters at standard temperature and pressure per gram		ALT	ALTERATION PRODUCT
Age	sample age		ANC	ANION CHROMATOGRAPHY		cm	centimeter		AM-SI	AMORPHOUS SILICA
AI	age item		AR_AR	AR40_AR39 AGE DETERMINATION		cps/g	counts per second/gram		AMES	AMESITE
Al	aluminum		ARC	ARC SPECTROMETRY		degrees C	degrees Celsius		AMPH	AMPHIBOLE
Al2O3	aluminium oxide		AUT	AUTO ANALYZER		dpm	disintegrations per minute		AN	ANORTHITE
ALK	alkalinity		AUTLCH	AUTOMATED LEACHING		dpm/g	disintegrations per minute per gram		ANAL	ANALCITE
ALKENONE	alkenone		BOMB	CARBONATE BOMB		fg/g	femptograms per gram		ANALC	ANALC
ALLA	allanite		CALC	CALCULATED		Ga	billion years ago		ANCL	ANORTHOCLASE
ALM	almandine		CCP	CALCIUM CARBONATE PRESERVATION		GPa	gigapascal		ANH	ANHYDRITE
AL-SAP	aluminum saponite		CHN	CARBON HYDROGEN NITROGEN ANALYSIS		ka	thousand years ago		ANOR	ANORTHOSITE
ALT	alteration product		CHN-G	CHN GAS CHROMATOGRAPHY		KBAR	kilobar		APA	APATITE
AMES	amesite		CHS	CARBON HYDROGEN SULFUR ELEMENTAL ANALYZER		km	kilometer		ARA	ARAGONITE
AMG	amygdule		CMBN	COMBUSTION		m	meter		ARMA	ARMALCOLITE
AMPH	amphibole		CNS	CARBON NITROGEN SULFUR ANALYZER		Ma	million years ago		AUG	AUGITE
AM-SI	amorphous silica		COL	COLORIMETRIC ANALYSIS		meq/kg	milliequivalent per kilogram		AWA	AWARUITE
AN	anorthite		COUL	COULOMETRICAL ANALYSIS		micromol	micromol		BIO	BIOTITE
ANAL	analcite		CSA	CARBON SULFUR ANALYSIS		micron	micron		BST	BST
ANCL	anorthoclase		DCP	DIRECT CURRENT PLASMA (FURTHER DETAIL NOT PROVIDED)		millimol	millimol		BZT	BRONZITE
AND	andalusite		DCP-AES	DIRECT CURRENT PLASMA ATOMIC EMISSION SPECTROMETRY		MLSTP/G	milliliters per gram at standard temperature and pressure		CALC	CALCITE
ANDR	andradite		DROES	DIRECT READING OPTICAL EMISSIONS SPECTROSCOPY		mm	millimeter		CARB	CARBONATE
ANH	anhydrite		EA	ELEMENTAL ANALYSIS		mmol/kg	millimol per kilogram		CASU	CALCIUM SULFATE
ANOR	anorthosite		EA-CF-IRMS	ELEMENTAL ANALYZER-CONTINUOUS FLOW ISOTOPE RATIO MASS SPECTROMETRY		mmol/L	millimol per liter		CATS	CaAl(AlSiO6)
APA	apatite		EMP	ELECTRON MICROPROBE		mol	mol		CCR	CaCr(AlSiO6)
Ar	argon		ENAA	EPITHERMAL NEUTRON ACTIVATION ANALYSIS		mol%	mol percent		CEL	CELADONITE
Ar36	argon isotope ar36		ES	EMISSION SPECTROMETRY		mol/g	moles per gram		CEL-NON	CELADONITE-NONTRONITE
Ar36_Ar38	ratio of argon isotopes ar36 to ar38		FIS	FISSION TRACK		Mpa	megapascal		CEL-NON-SAP	CELADONITE-NONTRANITE-SAPONITE
Ar36_Ar40	ratio of argon isotopes ar36 to ar40		FL-ES	FLAME EMISSION SPECTROSCOPY		nanomol	nanomol		CHL	CHL
Ar37_Ar40	ratio of ar37 to ar40		FP	FILM POLAROGRAPHY		nccstp/g	nanocubic centimeters per gram at standard temperature and pressure		CHL/SMEC	CHLORITE/SMECTITE
Ar38	argon isotope ar38		FPHOT	FLAME PHOTOMETRY		ng/g	nanograms per gram		CHLOR	CHLORITE
Ar38_Ar36	ratio of argon isotopes ar38 to ar36		FTIR	FOURIER TRANSFORM INFRARED SPECTROMETRY		per mil	parts per thousand		CHLOR-SAP	CHLORITE-SAPONITE
Ar39	argon isotope ar39		GAMMA	GAMMA COUNTING		per mil CDT	parts per thousand relative to CDT (Canon Diablo Troilite)		CHROM	CHROMITE
Ar39_Ar40	ratio of argon isotopes ar39 to ar40		GC	GAS CHROMATOGRAPHY		per mil SMOW	parts per thousand relative to SMOW (Standard Mean Ocean Water)		CHRYS	CHRYSOTILE
Ar40	argon isotope ar40		GC-MS	GAS CHROMATOGRAPHY- MASS SPECTROMETRY		ppb	parts per billion		CLAY	CLAY
Ar40*	radiogenic ar40		GF-AAS	GRAPHITE FURNACE ATOMIC ABSORPTION SPECTROMETRY		ppm	parts per million		CLS	CELESTINE
Ar40_Ar36	ratio of argon isotopes ar40 to ar36		GIO	GRADIENT ION-CHROMATOGRAPHY		ppm (atomic)	parts per million on atomic scale		CLY	CLAY MINERAL
Ar40_Ar36(I)	initial ar40 to ar36 ratio		GL-EL	GLASS ELECTRODE		ppt	parts per thousand		CMG	CUMMINGTONITE
Ar40_Ar39	ratio of argon isotopes ar40 to ar39		GRAV	GRAVIMETRY		umol	micromol		COR	CORUNDUM
Ar40_ATM	atmospheric argon isotope ar40		GS	GASOMETRIC TECHNIQUE		umol/g	micromoles per gram		CORD	CORDIERITE
Ar40_He4	ratio of argon isotopes ar40 to helium isotope he4		HPLC	HIGH-PERFORMANCE LIQUID CHROMATOGRAPHY		vol%	volume percent		CORR	CORRENSITE
Ar40_RG	radiogenic ar40		HR-ICP-MS	HIGH-RESOLUTION INDUCTIVELY COUPLED PLASMA MASS SPECTROMETRY		vs ATMOS	relative to the atmosphere		CPX	CLINOPYROXENE
Ar40RG_Ar39K	ratio of radiogenic ar40 to ar39 produced from k		IA	IMAGE ANALYSIS		vs CDT	relative to CDT (Canon Diablo Troilite)		CPY	CHALCOPYRITE
ARA	aragonite		ICP	INDUCTIVELY COUPLED PLASMA (FURTHER DETAIL NOT PROVIDED)		vs NBS951	relative to NBS-951 standard reference material		CRICH	CRICHTONITE
ARMA	armalcolite		ICP:AES	INDUCTIVELY COUPLED PLASMA ATOMIC EMISSION SPECTROSCOPY		vs PDB	relative to PDB (Pee Dee Belemnite)		CRIS	CRISTOBALITE
As	arsenic		ICP:ES	INDUCTIVELY COUPLED PLASMA SOURCE EMISSION SPECTROMETRY		vs SLAP	relative to SLAP (Standard Light Antarctic Precipitation)		CSO	CaSiO3, HIGH PRESSURE
Au	gold		ICP:LA	INDUCTIVELY COUPLED PLASMA LASER ABLATION (FURTHER DETAIL NOT PROVIDED)		vs SMOW	relative to SMOW (Standard Mean Ocean Water)		CST	COESITE
AUG	augite		ICP:LAM	INDUCTIVELY COUPLED PLASMA MASS SPECTROMETRY LASER ABLATION MICROPROBE		wt%	weight percent		CTD	CHLORITOID
AWA	awaruite		ICP:MS	INDUCTIVELY COUPLED PLASMA MASS SPECTROMETRY		years	years		CTI	CaTi(Al2O6)
B	boron		ICP:MS-HR	INDUCTIVELY COUPLED PLASMA MASS SPECTROMETRY HIGH-RESOLUTION					CUB	CUBANITE
B_Ca	ratio of boron to calcium		ICP:MS-ID	INDUCTIVELY COUPLED PLASMA MASS SPECTROMETRY ISOTOPE DILUTION					DI	DIOPSIDE
B11_B10	boron isotope		ICP:MS-LA	INDUCTIVELY COUPLED PLASMA MASS SPECTROMETRY LASER ABLATION					DIA	DIAMOND
Ba	barium		ICP:MS-LA-MC	INDUCTIVELY COUPLED PLASMA MASS SPECTROMETRY LASER ABLATION MULTICOLLECTOR					DOL	DOLOMITE
Ba_Ca	ratio of barium to calcium		ICP:MS-MC	INDUCTIVELY COUPLED PLASMA MASS SPECTROMETRY MULTI-COLLECTOR					ED-HORN	EDENITIC HORNBLENDE
BaO	barium oxide		ICP-OES	OPTICAL EMISSION SPECTROSPCOPY					EDE	EDENITE
BaSO4	barite		ICS	IRIDIUM COINCIDENCE SPECTROMETRY					EN	ENSTATITE
Be	beryllium		IGN	IGNITION					EP	EPIDOTE
Be10	beryllium isotope be10		IMP	ION MICROPROBE					FE-OX	FE-OXIDE
Be10_Be9	ratio of beryllium isotopes be10 to be9		INAA	INSTRUMENTAL NEUTRON ACTIVATION ANALYSIS					FETI-OX	FE-TI OXIDE
Be10_Be9(T)	ratio of isotopes be10 to be 9, time corrected		INC	ION CHROMATOGRAPHY					FPER	FERROPERICLASE
Be9	beryllium isotope be9		IR-SP	INFRA-RED SPECTROSCOPY					FSP	FELDSPAR
Bi	bismuth		ISE	ION SENSITIVE ELECTRODE					GAR	GARNET
BIO	biotite		IVA	INVERSION VOLT-AMPERMETRY					GL	GLASS
Br	bromium		K-AR	K-AR AGE DETERMINATION					GM	GROUNDMASS
BROMIDE	bromide		LAICP	INDUCTIVELY COUPLED PLASMA LASER ABLATION (FURTHER DETAIL NOT PROVIDED)					GM-GL	GLASSY GROUNDMASS
BST	bastite		LA-ICPMS	LASER ABLATION INDUCTIVELY COUPLED PLASMA MASS SPECTROMETRY					GOLD	GOLD
BZT	bronzite		LF	LASER FLUORINATION					GONN	GONNARDITE
C	carbon		LU-HF	LUTETIUM-HAFNIUM AGE DETERMINATION					GRAPH	GRAPHITE
C(INORG)	inorganic carbon		MANO	MANOMETRY					HAUY	HAUYNE
C(ORG)	organic carbon		MBS	MOLYBDATE-BLUE SPECTROMETRY					HEM	HEMATITE
C(TOT)	total carbon		MC-ICP-MS	LASER ABLATION MULTICOLLECTOR INDUCTIVELY COUPLED PLASMA MASS SPECTROMETRY					HERC	HERCYNITE
C_(non-carb)	non-carbonate carbon		MOSS	MOSSBAUER SPECTRA					HEU	HEULANDITE
C_N	ratio of organic carbon to total nitrogen		MS	MASS SPECTROMETRY					HGAR	HYDROGARNET
C14_AGE	c14_age		MS:ID	ISOTOPE DILUTION MASS SPECTROMETRY					HORN	HORNBLENDE
Ca	calcium		MS:SIMS	SECONDARY IONIZATION MASS SPECTROMETRY					HSCHL	HYDROSCHORLOMITE
Ca_K	ratio of calcium to potassium		MS:SS-ID	SPARK SOURCE MASS SPECTROMETRY - ISOTOPE DILUTION					HYGR	HYDROGROSSULAR
CaCO3	calcium carbonate		MS:SSMS	SPARK SOURCE MASS SPECTROMETRY					IDD	IDDINGSITE
CALC	calcite		MS:TIMS	THERMAL IONIZATION MASS SPECTROMETRY					ILL	ILLITE
CALCITE	calcite		MS:TIMS-ID	TIMS ISOTOPE DILUTION					ILM	ILMENITE
CALIBRATED C14_AGE	calibrated c14_age		MS:TIMS-ID-NEG	NEGATIVE THERMAL IONIZATION MASS SPECTROMETRY ISOTOPE DILUTION					INT	INTERSTITIAL
CaO	calcium oxide		MS:TIMS-NEG	NEGATIVE THERMAL IONIZATION MASS SPECTROMETRY					IO	INCLUDED IN OLIVINE
Ca-OL	calcium-olivine		MS-ID	MASS SPECTROMETRY ISOTOPE DILUTION					JD	NaAl(Si2O6)
CAP_DELTA_S33	deviation of delta_s33 from the terrestrial fractionation array, calculated as delta_s33 minus 1000 times ((delta_s34 divided by 1000 then plus one) taken to the 0.515th power) minus 1 or cap_delta_33s=delta_s33-1000×[(delta_s34/1000+1)^0.515-1]		NAA	NEUTRON ACTIVATION ANALYSIS					KAER	KAERSUTITE
CARB	carbonate		NAA-PG	PROMPT-GAMMA NEUTRON ACTIVATION ANALYSIS					KELY	KELYPHITE
CASU	calcium sulfate		NCC	NEUTRON COINCIDENCE COUNTING					KF	K-FELDSPAR
CATS	calcium tschermak molecule		NN	UNKNOWN					KY	KYANITE
CCR	calcium chromium clinopyroxene		NSFA-ID	NICKEL SULFIDE FIRE ASSAY ISOTOPE DILUTION					LAU	LAUMONITE
Cd	cadmium		NTIMS	NEGATIVE THERMAL IONIZATION MASS SPECTROMETRY					LAW	LAWSONITE
Cd_Ca	ratio of cadmium to calcium		NTIMS-ID	NEGATIVE THERMAL IONIZATION MASS SPECTROMETRY ISOTOPE DILUTION					LEU	LEUCITE
Ce	cerium		OES	OPTICAL EMISSION SPECTROMETRY					LHER	LHERZOLITE
Ce136_Ce142	ratio of cerium isotopes ce136 to ce142		OPS	OPTICAL SPECTROSCOPY					MAF	MAFIC MINERALS
Ce138_Ce142	ratio of cerium isotopes ce138 to ce142		PB-PB	PB-PB DATING					MARC	MARCASITE
Ce140_Nd146	ratio of cerium to neodymium isotopes ce140 to nd146		PC	POINT-COUNTING					MGH	MAGHEMITE
Ce2O3	cerium oxide		PEN	PENFIELD METHOD					MICA	MICA
CEL	celadonite		PGNAA	PROMPT-GAMMA NEUTRON ACTIVATION ANALYSIS					MIL	MILLERITE
CEL-NON	celadonite-nontronite		PMP	PROTON MICROPROBE					MNZ	MONAZITE
CEL-NON-SAP	celadonite-nontranite-saponite		POT	POTENTIOMETRY					MONT	MONTMORILLONITE
CELS	celsian		PYHY	PYROHYDROLYSIS					MS	MATNESITE
CH4	methane		RA-TH	RA226_TH230 AGE DETERMINATION					MT	MAGNETITE
CHL/SMEC	chlorite/smectite		RB-SR	RB-SR AGE DETERMINATION					MULL	MULLITE
CHLOR	chlorite		REF	REFRACTOMETER					MUS	MUSCOVITE
CHLORINITY	chlorinity		RE-OS	RHENIUM-OSMIUM AGE DETERMINATION					MYR	MYRMEKITE
CHLORITE	chlorite		REP	ROCK EVAL PYROLYSIS					NAC	NaCr(Si2O6)
CHLOR-SAP	chlorite-saponite		RNAA	RADIOANALYTICAL NEUTRON ACTIVATION					NATR	NATROLITE
CHRG_BAL	electrical charge balance, calculated as the sum of cations vs. anions		RR	RAPID ROCK					NCU	NATIVE COPPER
CHROM	chromite		RSA	RADIO-ISOTOPIC SAMPLE AGE					NE	NEPHELINE
CHRYS	chrysotile		SEM	SCANNING ELECTRON MICROSCOPE					NN	UNKNOWN
Cl	chlorine		SEM-EDS	SEM-ENERGY DISPERSIVE XRAYS					OL	OLIVINE
CLAY	clay		SIMS	SECONDARY ION MASS SPECTROMETRY					OL(R)	OL(R)
CLS	celestine		SMA	SOLID'S MOISTURE ANALYSIS					OLIG	OLIGOCLASE
CLY	clay mineral		SM-ND	SAMARIUM-NEODYMIUM AGE DETERMINATION					OLPS	OLIVINE PSEUDOMORPH
CMG	cummingtonite		SPEC	SPECTROGRAPHIC ANALYSIS					OLXC	OLIVINE XENOCRYST
Co	cobalt		SP-PH	SPECTROPHOTOMETRY					OMPH	OMPHACITE
CO1	carbon monoxide		SS-ID	SPARK SOURCE MASS SPECTROMETRY - ISOTOPE DILUTION					OPQ	OPAQUE MINERAL
CO2	carbon dioxide		SSMS	SPARK SOURCE MASS SPECTROMETRY					OPX	ORTHOPYROXENE
CO2_umol	carbon dioxide measured in micromols		TH_PB	THORIUM-LEAD AGE DETERMINATION					OR	ORTHOCLASE
CoO	cobalt oxide		TIMS	Thermal Ionization Mass Spectrometer					ORE	ORE
COR	corundum		TIMS-ID	THERMAL IONIZATION MASS SPECTROMETRY ISOTOPE DILUTION					OX	OXIDE
CORD	cordierite		TITR	TITRATION					OX-CEL	OXYHYDROXIDE-CELADONITE
CORR	corrensite		U_PA	U235_PA231 AGE DETERMINATION					OX-PHYLL	OXYHYDROXIDE-PHYLLOSILICATE
CPX	clinopyroxene		U_PB	URANIUM LEAD AGE DETERMINATION					PAL	PALAGONITE
CPY	chalcopyrite		U_TH	U238_TH230 AGE DETERMINATION					PARA	PARAGONITE
Cr	chromium		U_TH_HE	U-TH-HE AGE DETERMINATION					PARG	PARGASITE
Cr2O3	chromium oxide		UNKNOWN	UNKNOWN					PECT	PECTOLITE
CRICH	crichtonite		U-PB	URANIUM-LEAD AGE DETERMINATION					PENT	PENTLANDITE
CRIS	cristobalite		UV-ES	ULTRAVIOLET EMISSION SPECTROGRAPHY					PEROV	PEROVSKITE
Cs	cesium		VAC-F	VACUUM FUSION					PGN	PIGEONITE
Cs137_ACTIVITY	cesium isotope cs137 reported as activity		VOL	VOLUMETRIC ANALYSIS					PHE	PHENGITE
CSO	casio3, high pressure		WET	WET CHEMISTRY					PHIL	PHILIPPSITE
CST	coesite		XANES	X-RAY ABSORPTION NEAR-EDGE STRUCTURE SPECTROSCOPY					PHLOG	PHLOGOPITE
CTD	chloritoid		XRD	X-RAY DISPERSIVE SPECTROMETRY					PHYLL	PHYLLOSILICATE
CTI	calcium titanium tschermak molecule		XRF	X-RAY FLUORESCENCE					PL-XC	PLAGIOCLASE XENOCRYST
Cu	copper		XRF-EDS	ENERGY-DISPERSIVE X-RAY FLUORESCENCE					PLAG	PLAGIOCLASE
Cu2O	copper(i) oxide		XRF-SCAN	X-RAY FLUORESCENCE SCANNING					PREH	PREHNITE
CUB	cubanite								PSB	PSEUDOBROOKITE
CuO	copper oxide								PUMP	PUMPELLYITE
DELTA_B11	equals: (ratio of boron isotopes b11/b10 in the sample divided by ratio of b11/b10 in reference material srm951) minus 1, multiplied by 1000								PX	PYROXENE (NOT CLASSIFIED)
DELTA_C13	equals: (ratio of carbon isotopes c13/c12 in the sample divided by ratio of c13/c12 of the pee dee belemnite) minus 1, multiplied by 1000								PY	PYRITE
DELTA_Ca44	equals :(ratio of 44ca to 40ca sample) divided by (ratio of 44ca std to 40ca std) minus 1, multplied by 1000								PYRH	PYRRHOTITE
DELTA_Cl37	equals: (ratio of chlorine isotopes cl37/cl35 in the sample divided by ratio of cl37/cl35 of the standard mean ocean chlorine) minus 1, multiplied by 1000								PYRPH	PYROPHYLLITE
DELTA_D	equals: (ratio of hydrogen isotopes h2/h1 in the sample divided by ratio of h2/h1 in reference material ) minus 1, multiplied by 1000								QZ	QUARTZ
DELTA_Fe56	equals: (ratio of iron isotopes fe56/fe54 in the sample divided by ratio of fe56/fe54 of irmm-014) minus 1, multiplied by 1000								RHO	RHONITE
DELTA_Fe57	equals: (ratio of iron isotopes fe57/fe54 in the sample divided by ratio of fe57/fe54 of irmm-014) minus 1, multiplied by 1000								RUT	RUTILE
DELTA_Li6	equals: (ratio of lithium isotopes li6/li7 in the sample divided by ratio of li6/li7 of the standard) minus 1, multiplied by 1000								SAP	SAPONITE
DELTA_Li7	equals: (ratio of lithium isotopes li7/li6 in the sample divided by ratio of li7/li6 of the standard) minus 1, multiplied by 1000								SAP-FE-OX	SAPONITE-IRON-OXIDE
DELTA_Mg25	equals: (ratio of magnesium isotopes mg25/mg24 in the sample divided by ratio of mg25/mg24 in the reference material) minus 1, multiplied by 1000								SAP-GA	SAPONITE-GLAUCONITE
DELTA_Mg26	equals: (ratio of magnesium isotopes mg26/mg24 in the sample divided by ratio of mg26/mg24 in the reference material) minus 1, multiplied by 1000								SCAP	SCAPOLITE
DELTA_N15	equals: (ratio of nitrogen isotopes n15/n14 in the sample divided by ratio of n15/n14 in the reference material) minus 1, multiplied by 1000								SERP	SERPENTINE
DELTA_O18	equals: (ratio of oxygen isotopes o18/o16 in the sample divided by ratio of o18/o16 of the standard) minus 1, multiplied by 1000								SIL	SILICATE
DELTA_S33	equals: (ratio of sulfur isotopes s33/s32 in the sample divided by ratio of s33/s32 in the reference material) minus 1, multiplied by 1000								SILM	SILLIMANITE
DELTA_S34	equals: (ratio of sulphur isotopes s34/s32 in the sample divided by ratio of s34/s32 in reference material ) minus 1, multiplied by 1000								SIOH	SiO2, HIGH PRESSURE
DELTA_S34SO4	sulfur isotope of the sulfate. equals: (ratio of sulphur isotopes s34/s32 in the sample divided by ratio of s34/s32 in reference material ) minus 1, multiplied by 1000								SLFA	SULFATE
DELTA_U234	equals: (ratio of uranium isotopes u234/u238 in the sample divided by ratio of u234/u238 in the secular equilibrium) minus 1, multiplied by 1000								SLFI	SULFIDE
DELTA_Zn66	equals :(ratio of 66zn to 64zn sample) divided by (ratio of 66zn std to 64zn std) minus 1, multplied by 1000								SMEC	SMECTITE
DI	diopside								SMEC-CEL	SMECTITE-CELADONITE
DIA	diamond								SND	SANIDINE
DIC	dissolved inorganic carbon								SODA	SODALITE
DOL	dolomite								SP	SPINEL
Dy	dysprosium								SPH	SPHENE
Dy2O3	dysprosium oxide								SPHL	SPHALERITE
E_Cd	epsilon 114/110cadmium								SS	SHEET SILICATE
E_Ce	epsilon ce = [(138ce/142ce)sample/(138ce/142ce)chur - 1]x10e4								SULF	SULF
E_Hf	epsilon hf = [(176hf/177hf)sample/(176hf/177hf)chur - 1]x10e4								SYMP	SYMPLECTITE
E_Hf(T)	epsilon hf = [(176hf/177hf)sample/(176hf/177hf)chur - 1]x10e4, time corrected								SYMT	SYMTHITE
E_Nd	epsilon nd = [(nd143/nd144)sample/(nd143/nd144)reference - 1]x10e4								TALC	TALC
E_Nd(JUV)	epsilon nd(juv) = [(nd143/nd144)sample/(nd143/nd144)juv - 1]x10e4, where juv is juvinas achondrite								THOM	THOMSONITE
E_Nd(T)	epsilon nd = [(nd143/nd144)sample/(nd143/nd144)reference - 1]x10e4, time corrected								TI-MT	TI-MAGNETITE
E_Sr	epsilon sr= [(sr87/sr86)sample/(sr87/sr86)reference - 1]x10e4								TI-NB	TITANONIOBATE
E_Sr(T)	epsilon sr= [(sr87/sr86)sample/(sr87/sr86)reference - 1]x10e4, time corrected								TREM	TREMOLITE
E_Tl205	epsilon thallium isotope 205								TREV	TREVORITE
EDE	edenite								TRI	TRIDYMITE
ED-HORN	edenitic hornblende								TRO	TROILITE
EN	enstatite								ULSP	ULVOSPINEL
EP	epidote								VES	VESICLES
Er	erbium								VES-F	FILLED VESICLE
Eu	europium								YMG	YIMENGITE
F	fluorine								ZEOL	ZEOLITE
FA	fayalite								ZIRC	ZIRCON
Fe	iron								ZOI	ZOISITE
Fe2O3	ferric iron oxide (tri-valent iron)
Fe2O3T	total iron oxide content reported as ferric (tri-valent) iron
Fe3_SUMFe	ratio of fe3+ to total fe
Fe3O4
Fe3P_FeT	feric iron total iron ratio
FeCO3	siderite
Fe-Fe	iron ferrite = fefe2o4
FeO	ferrous iron oxide (di-valent)
FE-ORE	iron ore
FeOT	total iron oxide content reported as ferrous (di-valent) iron
FE-OX	fe-oxide
FeS2	iron sulfide
FETI-OX	iron titanium oxide
FO	forsterite
FORMATE	formate
FPER	ferropericlase
FS	ferrosilite
FSP	feldspar
G_Os	gamma osmium
G_Os(T)	gamma osmium, time corrected
Ga	gallium
GAL	galaxite = mnal2o4
GAR	garnet
Gd	gadolinium
Gd2O3	gadolinium oxide
Ge	germanium
GKL	geikilite
GL	glass
GM	groundmass
GM-GL	glassy groundmass
GOLD	gold
GONN	gonnardite
GPH	graphite
GRAPH	graphite
GROS	grossular
H	hydrogen
H(TOT)	total hydrogen
H2	hydrogen
H2O	water
H2OM	crystal water (h2o-)
H2OP	crystal water (h2o+)
H2S	hydrogen sulfide
H2S(TOT)	total sulfide
H4SiO4	silicic acid
HALITE	halite
HAUS	hausmannite
HAUY	hauyne
HCO3	bicarbonate
HCY	hercynite
He	helium
He3	helium isotope he3
He3_He4	ratio of helium isotopes he3 to he4
He3_He4(R/Ra)	ratio of helium isotopes he3 to he4 expressed relative to the helium isotope ratio of the atmosphere
He4	helium isotope he4
He4(NCC)	helium isotope he4 measured by neutron coincidence counting
He4_Ar40	ratio of helium isotope he4 to argon isotope ar40
He4_He3	ratio of helium isotopes he4 to he3
He4_Ne20	ratio of helium isotope he4 to neon isotope ne20
He4_Ne21	ratio of helium isotope he4 to neon isotope ne21
HEDN	hedenbergite
HEM	hematite
HERC	hercynite
HEU	heulandite
Hf	hafnium
Hf176_Hf177	ratio of hafnium isotopes hf176 to hf177
Hf176_Hf177(I)	ratio of hafnium isotopes hf176 to hf177 at initial time
Hf176_Hf177(T)	ratio of hafnium isotopes hf176 to hf177, time corrected
Hf177_Hf178	ratio of hafnium isotopes hf177 to hf178
Hf178_Hf177	ratio of hafnium isotopes hf178 to hf177
Hf179_Hf177	ratio of hafnium isotopes hf179 to hf177
Hf180_Hf177	ratio of hafnium isotopes hf180 to hf177
HfO2	hafnium oxide
Hg	mercury
HGAR	hydrogarnet
Ho	holmium
HORN	hornblende
HSCHL	hydroschorlomite
HYGR	hydrogrossular
I	iodine
IDD	iddingsite
ILL	illite
ILM	ilmenite
In	indium
INT	interstitial
IO	included in olivine
Ir	iridium
JAC	jacobsite
JD	jadeite
K	potassium
K2O	potassium oxide
KAER	kaersutite
KAOLINITE	kaolinite
KELY	kelyphite
KF	potassium feldspar
Kr	krypton
Kr78	krypton isotope kr78
Kr78_Kr84	ratio of krypton isotopes kr78 to kr84
Kr80	krypton isotope kr80
Kr80_Kr84	ratio of krypton isotopes kr80 to kr84
Kr82	krypton isotope kr82
Kr82_Kr84	ratio of krypton isotopes kr82 to kr84
Kr83	krypton isotope kr83
Kr83_Kr84	ratio of krypton isotopes kr83 to kr84
Kr84	krypton isotope kr84
Kr86	krypton isotope kr86
Kr86_Kr84	ratio of krypton isotopes kr86 to kr84
Kr90	krypton isotope kr90
KS	kalsilite
KY	kyanite
La	lanthanum
La2O3	lanthanum oxide
LAU	laumonite
LAW	lawsonite
LEU	leucite
LHER	lherzolite
Li	lithium
Li7_Li6	ratio of litium isotopes li7 toli6
LOI	loss on ignition
Lu	lutetium
Lu176_Hf177	ratio of lutetium isotope lu176 to hafnium isotope hf177
Lu176_Hf177(T)	ratio of lutetium isotope lu176 to hafnium isotope hf177, time corrected
Lu176_Lu177	ratio of lutetium isotopes lu176 to lu177
LW	lawsonite
MAF	mafic minerals
MARC	marcasite
Mg	magnesium
Mg_Ca	ratio of magnesium to calcium
MgCO3	magnesium carbonate
MGCR	magnesiochromite
MGF	mg-ferrite
MGH	maghemite
MgO	magnesium oxide
MICA	mica
MIL	millerite
Mn	manganese
Mn_Ca	ratio of manganese to calcium
Mn3O4	manganese tetroxide
MnCO3	manganese carbonate
MNCR	manganese chromite
MnO	manganese oxide
Mn-OL	manganese olivine
MNZ	monazite
Mo	molybdenum
MONT	montmorillonite
MS	matnesite
MT	magnetite
MULL	mullite
MUS	muscovite
MYR	myrmekite
N	nitrogen
N(A)	percent nitrogen in the a defect site of diamonds
N(B)	percent nitrogen in the b defect site of diamonds
N(ORG)	organic nitrogen
N(TOT)	total nitrogen
N2	nitrogen
N2[nmol]	nitrogen measured in nanomols
N2_Ar36	ratio of nitrogen isotope n2 to argon isotope ar36
N2_He3	ratio of nitrogen isotope n2 to helium isotope he3
Na	sodium
Na2O	sodium oxide
NAC	clinopyroxene end-member nacr (si2o6)
NATR	natrolite
Nb	niobium
Nb2O3	niobium oxide
Nb2O5	niobium pentoxide
NCU	native copper
Nd	neodymium
Nd_Ca	ratio of neodymium to calcium
Nd142_Nd144	ratio of neodymium isotopes nd142 to nd144
Nd143_Nd144	ratio of neodymium isotopes nd143 to nd144
Nd143_Nd144(I)	ratio of neodymium isotopes nd143 to nd144 at initial age
Nd143_Nd144(T)	ratio of neodymium isotopes nd143 to nd144, time corrected
Nd144_Nd146	ratio of neodymium isotopes nd144 to nd146
Nd145_Nd144	ratio of neodymium isotopes nd145 to nd144
Nd146_Nd142	ratio of neodymium isotopes nd146 to nd142
Nd146_Nd144	ratio of neodymium isotopes nd146 to nd144
Nd146_Nd145	ratio of neodymium isotopes nd146 to nd145
Nd148_Nd144	ratio of neodymium isotopes nd148 to nd144
Nd148O_Nd144O	ratio of neodymium nd148 oxide to neodymium nd144 oxide
Nd150_Nd144	ratio of neodymium isotopes nd150 to nd144
Nd2O3	neodymium oxide
Ne	neon
Ne20	neon isotope ne20
Ne20_Ne22	ratio of neon isotope ne20 to ne22
Ne21	neon isotope ne21
Ne21_He4	ratio of neon isotope ne21 to helium isotope he4
Ne21_Ne20	ratio of neon isotope ne21 to ne20
Ne21_Ne22	ratio of neon isotope ne21 to ne22
Ne22	neon isotope ne22
Ne22_Ne20	ratio of neon isotope ne22 to ne20
Ne23	neon isotope ne23
NH3	ammonia
NH4	ammonium
Ni	nickel
NiO	nickel oxide
NN	unknown
NO2	nitrite
NO3	nitrate
O	oxygen
O2	dioxygen
OH	hydroxide
OL	olivine
OL(R)	ol(r)
OLIG	oligoclase
OLPS	olivine pseudomorph
OLXC	olivine xenocryst
OMPH	omphacite
OPAL	opal
OPAQ	opaque mineral
OPQ	opaque mineral
OPX	orthopyroxene
OR	orthoclase
ORE	ore
Os	osmium
Os(I)	common osmium at initial age
Os184_Os188	ratio of osmium isotopes os184 to os188
Os186_Os188	ratio of osmium isotopes os186 to os188
Os187_Os186	ratio of osmium isotopes os187 to os186
Os187_Os188	ratio of osmium isotopes os187 to os188
Os187_Os188(I)	ratio of osmium isotopes os187 to os188 at initial age
Os187_Os188(T)	ratio of osmium isotopes os187 to os188, time corrected
Os188	osmium isotope os188
Os188_Os192	ratio of osmium isotopes os188 to os192
Os189_Os188	ratio of osmium isotopes os189 to os188
Os190_Os188	ratio of osmium isotopes os190 to os188
Os192_Os188	ratio of osmium isotopes os192 to os188
OX	oxide
OX-CEL	oxyhydroxide-celadonite
OX-PHYLL	oxyhydroxide-phyllosilicate
P	phosphorus
P(ORG)	phosphorous, organic
P2O5	phosphorus oxide
Pa	protactinium
Pa231	protactinium isotope pa231
Pa231_ACTIVITY	protactinium isotope pa231, reported as activity
Pa231_Th230	ratio of protactinium 231 to thorium 230
Pa231_U235_ACTIVITY	ratio of protactinium isotope pa231 to uranium isotope u235, reported as activity
Pa231_XS	excess protactinium 231
PAL	palagonite
PARA	paragonite
PARG	pargasite
Pb	lead
Pb204	lead isotope pb204
Pb204_Pb206	ratio of lead isotopes pb204 to pb206
Pb206	lead isotope 206
Pb206_Pb204	ratio of lead isotopes pb206 to pb204
Pb206_Pb204(I)	ratio of lead isotopes pb206 to pb204 at initial age
Pb206_Pb204(T)	ratio of lead isotopes pb206 to pb204, time corrected
Pb206_Pb207	ratio of lead isotopes pb206 to pb207
Pb206_Pb208	ratio of lead isotopes pb206 to pb208
Pb206_U235	ratio of lead isotope pb206 to uranium isotope u235
Pb206_U238	ratio of lead isotope pb206 to uranium isotope u238
Pb207_Pb204	ratio of lead isotopes pb207 to pb204
Pb207_Pb204(I)	initial pb207_pb204 ratio (age-corrected)
Pb207_Pb204(T)	ratio of lead isotopes pb207 to pb204, time corrected
Pb207_Pb206	ratio of lead isotopes pb207 to pb206
Pb207_Pb206(I)	ratio of lead isotopes pb207 to pb206 at initial age
Pb207_U235	ratio of lead isotope pb207 to uranium isotope u235
Pb208_Pb204	ratio of lead isotopes pb208 to pb204
Pb208_Pb204(I)	ratio of lead isotopes pb208 to pb204 at initial age
Pb208_Pb204(T)	ratio of lead isotopes pb208 to pb204, time corrected
Pb208_Pb206	ratio of lead isotopes pb208 to pb206
Pb208_Pb206(I)	ratio of lead isotopes pb208 to pb206 at initial age
Pb208_Th232	ratio of lead isotope pb208 to thorium isotope th232
Pb210	lead isotope pb210
Pb210_ACTIVITY	lead isotope pb210, reported as activity
Pb210_Ra226	ratio of lead isotope pb210 to radium isotope ra226
Pb210_U238	ratio of lead isotope pb210 to uranium isotope u238
Pb210_XS	excess lead 210
Pd	palladium
PECT	pectolite
PENT	pentlandite
PEROV	perovskite
PGN	pigeonite
pH	pH
PHEN	phengite
PHIL	philippsite
PHLOG	phlogopite
PHYLL	phyllosilicate
PI	physical item
PLAG	plagioclase
PLEO	pleonaste
PL-XC	plagioclase xenocryst
Po210	polonium isotope Po210
Po210_ACTIVITY	polonium isotope po210, reported as activity
Po210_Pb210	ratio of polonium isotope 210 to lead isotope 210
PO4	phosphate
Pr	praseodymium
PREH	prehnite
PRESS	pressure
PSB	pseudobrookite
Pt	platinum
Pt190_Os188	ratio of platinum isotope pt190 to osmium isotope os188
PUMP	pumpellyite
PX	pyroxene (not classified)
PY	pyrite
PYPH	pyrophanite
PYR	pyrope
PYRH	pyrrhotite
PYRPH	pyrophyllite
QUARTZ	quartz
QZ	quartz
r2	the correlation coefficient used to calculate the best-fit line through ambient seawater and the concentration of a given chemical species measured in the samples, plotted against Mg
Ra	radium
Ra226	radium isotope ra226
Ra226_ACTIVITY	radium 226, reported as activity
Ra226_Th230	ratio of radium isotope 226 to thorium isotope 230
Ra226_Th230_ACTIVITY	ratio of radium isotope 226 to thorium isotope 230, reported as activity
Rb	rubidium
Rb87_Sr86	ratio of rubidium isotope rb87 to strontium isotope sr86
Re	rhenium
Re187_Os186	ratio of rhenium isotope re187 to osmium isotope os186
Re187_Os188	ratio of rhenium isotope re187 to osmium isotope os188
Rh	rhodium
RHO	rhonite
Ru	ruthenium
RUT	rutile
S	sulfur
S(TOT)	total sulfur
S_(SLFI)	sulfur present as sulfide
S_PY	sulfur present in pyrite form
SAL	salinity
SAP	saponite
SAP-FE-OX	saponite-iron-oxide
SAP-GA	saponite-glauconite
Sb	antimony
Sc	scandium
Sc2O3	scandium oxide
SCAP	scapolite
Se	selenium
SERP	serpentine
Si	silica
Si(AMORPH)	amorphous silica
SID	sideromelane
SIL	silicate
SILM	sillimanite
SiO2	silica oxide
SIOH	sio2, high pressure
SLFA	sulfate
SLFI	sulfide
Sm	samarium
Sm147_Nd143	ratio of samarium isotope sm147 to neodymium isotope nd143
Sm147_Nd144	ration of samarium isotope sm147 to neodymium isotope nd144
Sm147_Nd146	ratio of samarium to neodymium isotopes sm147 to nd146
Sm2O3	samarium oxide
SMEC	smectite
SMEC-CEL	smectite-celadonite
Sn	tin
SND	sanidine
SO2	sulfur dioxide
SO3	sulfur trioxide
SO4	sulfate
SODA	sodalite
SP	spinel
SPES	spessartine
SPH	sphene
SPHL	sphalerite
Sr	strontium
Sr_Ca	ratio of sr to ca
Sr84_Sr86	ratio of strontium isotopes sr84 to sr86
Sr84_Sr88	ratio of strontium isotopes sr84 to sr88
Sr86_Sr88	ratio of strontium isotopes sr86 to sr88
Sr87_Sr86	ratio of strontium isotopes sr87 to sr86
Sr87_Sr86(I)	ratio of strontium isotopes sr87 to sr86 at initial age
Sr87_Sr86(T)	ratio of strontium isotopes sr87 to sr86, time corrected
Sr87_Sr88	ratio of strontium isotopes sr87 to sr88
Sr88_Sr86	ratio of strontium isotopes sr88 to sr86
SrO	strontium oxide
SS	sheet silicate
SYMP	symplectite
SYMT	symthite
Ta	tantalum
Ta2O5	tantalum oxide
TACH	tachylite
TALC	talc
Tb	terbium
Te	tellurium
TEMP	temperature
Th	thorium
Th227_ACTIVITY	th227 reported as activity
Th228_Th232	ratio of thorium isotopes th228 to th232
Th230	thorium isotope th230
Th230_ACTIVITY	thorium isotope th230, reported as activity
Th230_Th232	ratio of thorium isotopes th230 to th232
Th230_Th232_ACTIVITY	ratio of thorium isotopes th230 to th232, reported as activity
Th230_U238	ratio of thorium isotope th230 to uranium isotope u238
Th230_U238_ACTIVITY	ratio of thorium isotope th230 to uranium isotope u238, reported as activity
Th230_XS	excess thorium 230
Th232	thorium 232
Th232_ACTIVITY	thorium isotope th232, reported as activity
Th232_Pb204	ratio of thorium isotope th232 to lead isotope pb204
Th232_Th230	ratio of isotopes th232 to th230
Th232_Th230 ACTIVITY	ratio of isotopes th232 to th230 measured as activity
Th232_U238	ratio of thorium isotope th232 to uranium isotope u238
Th234	thorium 234
Th234_XS	thorium 234 excess
Th238_Th232_ACTIVITY	ratio of thorium isotopes th238 to th232, reported as activity
ThO	thorium oxide
ThO2	thorium oxide
THOM	thomsonite
Ti	titanium
TIC	total inorganic carbon
TI-MT	ti-magnetite
TI-NB	titanoniobate
TiO2	titanium oxide
Tl	thallium
Tl205_Tl203	ratio of thallium isotopes tl205 to tl203
Tm	thulium
TOC	total organic carbon
TREM	tremolite
TREV	trevorite
TRI	tridymite
TRO	troilite
U	uranium
U234	uranium 234
U234_ACTIVITY	uranium isotope u234, reported as activity
U234_U238	ratio of uranium isotopes u234 to u238
U234_U238 ACTIVITY	ratio of isotopes u234 to u235 measured as activity
U234_U238 ACTIVITY(T)	uranium 234 to uranium 238 measured as activity at time t
U234_U238_ACTIVITY	ratio of uranium isotopes u234 to u238, reported as activity
U235_Pb204	ratio of uranium isotope u235 to lead isotope pb204
U235_U234	ratio of isotopes u235 to u234
U238	uranium 238
U238_ACTIVITY	uranium isotope u238, reported as activity
U238_Pb204	ratio of uranium isotope u238 to lead isotope pb204
U238_Pb206	ratio of uranium isotope u238 to lead isotope pb206
U238_Th230	ratio of uranium isotope u238 to thorium isotope th230
U238_Th232	ratio of uranium isotope u238 to thorium isotope th232
U238_Th232_ACTIVITY	ratio of uranium isotope u238 to thorium isotope th232, reported as activity
UK'37	alkenone uk'37
ULSP	ulvospinel
UO2	uranium oxide
UVR	uvarovite
V	vanadium
V2O3	vanadium sesquioxide
V2O5	vanadium pentoxide
VES	vesicles
VES-F	filled vesicle
W	tungsten
WO	wollastonite
WO3	tungsten trioxide
Xe	xenon
Xe124	xenon isotope xe124
Xe124_Xe130	ratio of xenon isotopes xe124 to xe130
Xe124_Xe132	ratio of xenon isotopes xe124 to xe132
Xe126	xenon isotope xe126
Xe126_Xe130	ratio of xenon isotopes xe126 to xe130
Xe126_Xe132	ratio of xenon isotopes xe126 to xe132
Xe128	xenon isotope xe128
Xe128_Xe130	ratio of xenon isotopes xe128 to xe130
Xe128_Xe132	ratio of xenon isotopes xe128 to xe132
Xe129	xenon isotope xe129
Xe129_Xe130	ratio of xenon isotopes xe129 to xe130
Xe129_Xe132	ratio of xenon isotopes xe129 to xe132
Xe129_Xe136	ratio of xenon isotopes xe129 to xe136
Xe130	xenon isotope xe130
Xe130_Xe132	ratio of xenon isotopes xe130 to xe132
Xe131	xenon isotope xe131
Xe131_Xe130	ratio of xenon isotopes xe131 to xe130
Xe131_Xe132	ratio of xenon isotopes xe131 to xe132
Xe132	xenon isotope xe132
Xe132_Xe130	ratio of xenon isotopes xe132 to xe130
Xe134	xenon isotope xe134
Xe134_Xe130	ratio of xenon isotopes xe134 to xe130
Xe134_Xe132	ratio of xenon isotopes xe134 to xe132
Xe136	xenon isotope xe136
Xe136_He4	ratio of xenon isotope xe136 to helium isotope he4
Xe136_Xe130	ratio of xenon isotopes xe136 to xe130
Xe136_Xe132	ratio of xenon isotopes xe136 to xe132
Y	yttrium
Y2O3	yttrium oxide
Yb	ytterbium
Yb176_Hf177	ratio of ytterbium isotope yb176 to hafnium isotope hf177
YMG	yimengite
ZEOL	zeolite
ZIRC	zircon
Zn	zinc
ZnO	zinc oxide
ZO	zoisite
ZOI	zoisite
Zr	zirconium
Zr2O3	zirconium pentoxide
ZrO2	zirconium oxide
